# Supplementary material for: Limited and localized magmatism in the Central Atlantic Magmatic Province
Source: Nat Commun. 2020 Jul 7;11:3397. doi: 10.1038/s41467-020-17193-6 (PMC7341742; doi:10.1038/s41467-020-17193-6)
Supplement: Supplementary file 4 — Supplementary Data 1 [file 41467_2020_17193_MOESM4_ESM.xlsx]

## Sheet: Overview
Supplementary Dataset 1
Limited and localized magmatism in the Central Atlantic Magmatic Province
R.E. Marzen1*, D.J. Shillington1,6, D. Lizarralde2, J.H. Knapp3, D.M. Heffner4,7, J.K. Davis1,8, S.H. Harder5
1Lamont-Doherty Earth Observatory of Columbia University, Palisades, NY 10964
2Woods Hole Oceanographic Institution, Woods Hole, MA 02543
3Oklahoma State University, Stillwater, OK 74078
4University of South Carolina, Columbia, SC 29208
5University of Texas El Paso, El Paso, TX 79902
6now at Northern Arizona University, Flagstaff, AZ 86011
7now at Occidental Petroleum Corporation, Houston, TX 77046
8now at Drummond Carpenter, PLLC, Orlando, FL 32801
Worksheet	Column Number	Description
Line1_Shots	1	Shot Number (Mapped in Supplementary Fig. 1)
	2	Distance in km along seismic transect. Here, 0 is the SE end of the line. This is the opposite of Fig. 2, which was flipped so that Line 1 and Line 2 would both have distance increasing from NW to SE.
	3	Shot elevation in km
	4	Shot latitude in decimal degrees
	5	Shot longitude in decimal degrees
Line1_Instruments	1	Instrument Number*
		*Note that instrument numbers here have been renumbered from 1 to 1193 from the original instrument numbers that spanned 1 to 1200 because seven instruments were not recovered.
	2	Instrument elevation in km
	3	Instrument latitude in decimal degrees
	4	Instrument longitude in decimal degrees
Line1_ArrivalPicks	1	Shot Number
	2	Instrument Number
	3	Arrival Type: 1 is sedimentary refraction through top layer of sediment, 2 is sedimentary refraction through lower layer of sediment, 3 is crustal refraction Pg, -4 is Moho reflection PmP, 4 is upper mantle refraction Pn
	4	Distance in km of the instrument along the seismic transect
	5	Pick arrival time (s)
	6	Pick uncertainty (sigma, in s)
Line2_Shots	1	Shot Number (Mapped in Supplementary Fig. 1)
	2	Distance in km along seismic transect. Here, 0 is the NW end of the line.
	3	Shot elevation in km
	4	Shot latitude in decimal degrees
	5	Shot longitude in decimal degrees
Line2_Instruments	1	Instrument Number
	2	Instrument elevation in km
	3	Instrument latitude in decimal degrees
	4	Instrument longitude in decimal degrees
Line2_ArrivalPicks	1	Shot Number
	2	Instrument Number
	3	Arrival Type: 1 is sedimentary refraction through top layer of sediment, 2 is sedimentary refraction through lower layer of sediment, 3 is refraction through the upper crust Pg, 5 is refraction through the crust below the low velocity zone Pg, -6 is reflection off the Moho PmP, and 6 is refraction through the upper mantle Pn
	4	Distance in km of the instrument along the seismic transect
	5	Pick arrival time (s)
	6	Pick uncertainty (sigma, in s)

## Sheet: Line1_Shots
Shot Number	Distance (km)	Elevation (km)	Latitude (deg)	Longitude (deg)
1	316.466	0.18	32.6868	-84.9863
3	260.74	0.19	32.308	-84.5978
4	240.099	0.19	32.1604	-84.4641
5	222.346	0.15	32.0211	-84.3659
6	189.278	0.09	31.8091	-84.1194
7	178.149	0.09	31.7317	-84.0447
8	153.582	0.13	31.5794	-83.8543
10	101.088	0.08	31.2152	-83.5021
11	84.8009	0.08	31.0968	-83.4005
13	43.3076	0.06	30.806	-83.1272
14	20.919	0.05	30.6571	-82.9689

## Sheet: Line1_Instruments
Instrument Number	Elevation (km)	Instrument Latitude (deg)	Instrument Longitude (deg)
1	0.0457	30.5098	-82.8326
2	0.04855	30.5114	-82.8346
3	0.0474	30.5132	-82.8364
4	0.04505	30.5152	-82.8381
5	0.0506	30.517	-82.8396
6	0.0477	30.5189	-82.8413
7	0.04715	30.5209	-82.8429
8	0.04365	30.5229	-82.8447
9	0.04365	30.5248	-82.8463
10	0.0423	30.5266	-82.848
11	0.043	30.5278	-82.8505
12	0.04015	30.5281	-82.8547
13	0.0428	30.5279	-82.8592
14	0.04435	30.5277	-82.864
15	0.04385	30.5279	-82.8678
16	0.045	30.5286	-82.8705
17	0.04265	30.5301	-82.8735
18	0.04305	30.5313	-82.8758
19	0.04435	30.5329	-82.8781
20	0.0434	30.5341	-82.8807
21	0.0424	30.5348	-82.8843
22	0.04155	30.5342	-82.889
23	0.04795	30.5356	-82.8917
24	0.0506	30.5404	-82.8894
25	0.05405	30.5476	-82.8858
26	0.0576	30.5483	-82.8872
27	0.0531	30.5486	-82.8908
28	0.05385	30.5477	-82.8962
29	0.05615	30.5468	-82.9007
30	0.05495	30.5451	-82.9064
31	0.05135	30.5444	-82.9112
32	0.05665	30.5483	-82.9112
33	0.0558	30.5515	-82.9115
34	0.0524	30.5551	-82.9122
35	0.04855	30.5565	-82.9144
36	0.04895	30.5579	-82.9166
37	0.0526	30.5594	-82.9188
38	0.04915	30.5608	-82.9215
39	0.04925	30.5616	-82.9249
40	0.04815	30.5631	-82.9269
41	0.04355	30.5645	-82.9289
42	0.0462	30.5663	-82.9307
43	0.04905	30.5677	-82.9329
44	0.05135	30.5682	-82.9365
45	0.0544	30.5695	-82.94
46	0.0559	30.5724	-82.94
47	0.06035	30.5757	-82.9393
48	0.04845	30.5778	-82.9407
49	0.04925	30.5798	-82.9421
50	0.05215	30.5823	-82.9432
51	0.0464	30.5842	-82.9437
52	0.0544	30.5868	-82.9451
53	0.0553	30.5914	-82.9434
54	0.04845	30.5963	-82.9404
55	0.05475	30.5996	-82.9409
56	0.0484	30.6021	-82.9415
57	0.0496	30.6047	-82.9419
58	0.05295	30.6089	-82.9399
59	0.05115	30.6124	-82.94
60	0.04775	30.613	-82.9439
61	0.0524	30.6136	-82.9468
62	0.05245	30.6144	-82.9498
63	0.05295	30.6149	-82.9534
64	0.04845	30.6139	-82.9593
65	0.05095	30.6156	-82.9613
66	0.05285	30.6173	-82.9624
67	0.05475	30.6196	-82.9645
68	0.05145	30.6213	-82.9663
69	0.05355	30.6233	-82.9678
70	0.05285	30.6257	-82.9688
71	0.0565	30.6271	-82.9714
72	0.0546	30.6284	-82.9739
73	0.0629	30.63	-82.9759
74	0.05825	30.6323	-82.9772
75	0.0591	30.6343	-82.978
76	0.0539	30.6364	-82.9799
77	0.05385	30.6383	-82.9815
78	0.0508	30.641	-82.982
79	0.0496	30.6439	-82.9826
80	0.0504	30.6465	-82.9828
81	0.0512	30.6532	-82.9782
82	0.0502	30.6608	-82.9716
83	0.05375	30.6687	-82.965
84	0.05425	30.6711	-82.9658
85	0.05415	30.6731	-82.967
86	0.0523	30.6756	-82.9679
87	0.0537	30.6839	-82.9652
88	0.0508	30.687	-82.9647
89	0.05215	30.6907	-82.9641
90	0.05335	30.6933	-82.9647
91	0.0538	30.6962	-82.965
92	0.053	30.6983	-82.9665
93	0.05065	30.7008	-82.9672
94	0.05135	30.7012	-82.9713
95	0.051	30.7015	-82.975
96	0.04915	30.7019	-82.9798
97	0.0529	30.702	-82.9832
98	0.05235	30.702	-82.9874
99	0.0521	30.702	-82.9918
100	0.0509	30.7019	-82.9961
101	0.0514	30.7019	-83.0004
102	0.0517	30.7019	-83.0047
103	0.0504	30.702	-83.0094
104	0.05125	30.7022	-83.0128
105	0.0534	30.7028	-83.0167
106	0.04815	30.7032	-83.0203
107	0.04695	30.7034	-83.0243
108	0.04815	30.7035	-83.0282
109	0.0383	30.7041	-83.033
110	0.03835	30.7045	-83.0357
111	0.0376	30.705	-83.0395
112	0.0374	30.7057	-83.0439
113	0.03835	30.7063	-83.0471
114	0.03665	30.7068	-83.0504
115	0.0435	30.7075	-83.0531
116	0.0453	30.7086	-83.0558
117	0.0481	30.7101	-83.0582
118	0.0445	30.7118	-83.0605
119	0.04615	30.7134	-83.0624
120	0.05175	30.7148	-83.0643
121	0.05	30.7163	-83.0665
122	0.049	30.7182	-83.0686
123	0.05395	30.7198	-83.0707
124	0.05165	30.7213	-83.0727
125	0.04675	30.7228	-83.0747
126	0.0522	30.7245	-83.0767
127	0.05375	30.7262	-83.079
128	0.0513	30.7277	-83.0809
129	0.05355	30.7295	-83.083
130	0.058	30.7311	-83.085
131	0.05625	30.7326	-83.0872
132	0.05335	30.7343	-83.0891
133	0.05825	30.7359	-83.0912
134	0.05785	30.7375	-83.0933
135	0.05145	30.7391	-83.0954
136	0.0548	30.7407	-83.0973
137	0.0556	30.7424	-83.0995
138	0.0578	30.744	-83.1016
139	0.0607	30.7456	-83.1036
140	0.0578	30.7472	-83.1057
141	0.06145	30.7488	-83.1077
142	0.06335	30.7504	-83.1098
143	0.06315	30.752	-83.1119
144	0.064	30.7537	-83.1139
145	0.0577	30.7553	-83.116
146	0.05675	30.789	-83.1316
147	0.06115	30.7585	-83.1201
148	0.05345	30.7602	-83.1221
149	0.06075	30.7616	-83.1242
150	0.0499	30.7634	-83.1263
151	0.049	30.7649	-83.1286
152	0.0479	30.7663	-83.1309
153	0.049	30.7677	-83.1334
154	0.04625	30.7689	-83.1358
155	0.0514	30.77	-83.1384
156	0.05475	30.7715	-83.1409
157	0.05435	30.7733	-83.1427
158	0.05765	30.7757	-83.1435
159	0.05635	30.7792	-83.143
160	0.0552	30.782	-83.1434
161	0.0547	30.7844	-83.1445
162	0.05405	30.7892	-83.142
163	0.0563	30.7927	-83.1413
164	0.0566	30.7962	-83.1409
165	0.0591	30.7995	-83.1405
166	0.05865	30.8029	-83.1401
167	0.05945	30.8101	-83.1346
168	0.0583	30.8118	-83.1364
169	0.06165	30.8136	-83.1383
170	0.0619	30.8151	-83.1401
171	0.05725	30.8172	-83.1419
172	0.054	30.8191	-83.1434
173	0.0548	30.8211	-83.1452
174	0.0588	30.8228	-83.1468
175	0.05745	30.8254	-83.1476
176	0.05835	30.8287	-83.1473
177	0.0581	30.8299	-83.1503
178	0.0631	30.8296	-83.1553
179	0.0592	30.8296	-83.1591
180	0.05915	30.8304	-83.1624
181	0.0591	30.8312	-83.1655
182	0.0596	30.8321	-83.1687
183	0.0594	30.8321	-83.173
184	0.0638	30.8297	-83.1805
185	0.0629	30.8323	-83.1811
186	0.0619	30.8356	-83.1813
187	0.069	30.8385	-83.1812
188	0.0804	30.8408	-83.1823
189	0.08075	30.8432	-83.1834
190	0.07275	30.8453	-83.1842
191	0.0701	30.8486	-83.1848
192	0.06675	30.8525	-83.184
193	0.07015	30.8555	-83.1836
194	0.0739	30.8584	-83.1837
195	0.08315	30.8613	-83.1841
196	0.0704	30.8629	-83.1862
197	0.07005	30.8643	-83.1887
198	0.0683	30.8628	-83.1954
199	0.069	30.8653	-83.1957
200	0.0788	30.8662	-83.199
201	0.0883	30.869	-83.1992
202	0.08545	30.8718	-83.1995
203	0.07845	30.8741	-83.2005
204	0.07075	30.8759	-83.2024
205	0.07075	30.8773	-83.2046
206	0.07145	30.879	-83.2069
207	0.07255	30.881	-83.2082
208	0.0759	30.8828	-83.2102
209	0.06995	30.8923	-83.2016
210	0.07085	30.8958	-83.2004
211	0.0709	30.8982	-83.2016
212	0.06705	30.9006	-83.2025
213	0.06865	30.9033	-83.2036
214	0.07085	30.9056	-83.2041
215	0.0761	30.9081	-83.205
216	0.0797	30.9106	-83.206
217	0.07475	30.9136	-83.2063
218	0.07305	30.9155	-83.2081
219	0.07025	30.9158	-83.2121
220	0.07035	30.9161	-83.2155
221	0.0681	30.9172	-83.2187
222	0.0705	30.9175	-83.2225
223	0.06915	30.9186	-83.2251
224	0.0694	30.9203	-83.227
225	0.0716	30.9216	-83.2293
226	0.0708	30.9227	-83.2326
227	0.0714	30.9249	-83.2336
228	0.07135	30.9272	-83.2341
229	0.07705	30.9297	-83.2362
230	0.0774	30.9307	-83.2379
231	0.08125	30.9323	-83.2407
232	0.0799	30.9332	-83.2428
233	0.0824	30.9366	-83.2426
234	0.0835	30.9407	-83.2425
235	0.0787	30.9434	-83.2422
236	0.07905	30.9468	-83.2424
237	0.0784	30.9493	-83.2425
238	0.0748	30.9506	-83.2455
239	0.0737	30.9509	-83.2497
240	0.0671	30.9515	-83.2528
241	0.06085	30.9521	-83.2561
242	0.0524	30.9527	-83.2643
243	0.05015	30.9485	-83.2652
244	0.04515	30.9493	-83.2748
245	0.0542	30.9494	-83.2779
246	0.05345	30.9528	-83.2767
247	0.05785	30.9573	-83.2748
248	0.06115	30.9596	-83.2758
249	0.061	30.962	-83.2767
250	0.0646	30.965	-83.2768
251	0.06675	30.9683	-83.2766
252	0.06775	30.9713	-83.277
253	0.06725	30.9737	-83.2779
254	0.06675	30.9761	-83.2788
255	0.06765	30.9783	-83.28
256	0.0678	30.9805	-83.2812
257	0.0647	30.9824	-83.2831
258	0.06325	30.9837	-83.2851
259	0.0639	30.9857	-83.2872
260	0.06685	30.9874	-83.2892
261	0.06455	30.9888	-83.2912
262	0.05605	30.9914	-83.292
263	0.05555	30.9943	-83.2921
264	0.05695	30.9971	-83.2927
265	0.05365	30.9999	-83.2933
266	0.0518	31.0016	-83.295
267	0.0499	31.0033	-83.2972
268	0.05245	31.0047	-83.2992
269	0.06085	31.0064	-83.3014
270	0.0606	31.0079	-83.3035
271	0.0588	31.0096	-83.3054
272	0.0625	31.0113	-83.3071
273	0.0599	31.0132	-83.3092
274	0.06675	31.0116	-83.3156
275	0.07615	31.0112	-83.3205
276	0.0728	31.0108	-83.3251
277	0.0734	31.0136	-83.3256
278	0.0725	31.0158	-83.3265
279	0.0764	31.0175	-83.3287
280	0.0736	31.019	-83.3308
281	0.0738	31.0205	-83.3329
282	0.06565	31.0227	-83.3344
283	0.0642	31.025	-83.3358
284	0.0769	31.0271	-83.3372
285	0.0771	31.0286	-83.3389
286	0.0729	31.0304	-83.3408
287	0.071	31.0323	-83.3426
288	0.0711	31.0347	-83.3436
289	0.0702	31.0377	-83.3447
290	0.07015	31.0396	-83.3455
291	0.0701	31.0417	-83.3468
292	0.0713	31.0436	-83.3488
293	0.075	31.0456	-83.3501
294	0.0778	31.0476	-83.3512
295	0.0778	31.0501	-83.3524
296	0.0654	31.0537	-83.3518
297	0.07195	31.0578	-83.3505
298	0.07515	31.0622	-83.3496
299	0.0776	31.0639	-83.3505
300	0.0751	31.0663	-83.3517
301	0.07325	31.068	-83.3537
302	0.07555	31.0692	-83.3561
303	0.079	31.0705	-83.3586
304	0.07795	31.0725	-83.3606
305	0.0797	31.0742	-83.3622
306	0.079	31.0764	-83.3636
307	0.07775	31.0784	-83.365
308	0.0781	31.0801	-83.3671
309	0.07595	31.0814	-83.3695
310	0.07785	31.083	-83.3716
311	0.07625	31.0848	-83.3731
312	0.07585	31.0868	-83.3748
313	0.07435	31.0882	-83.3772
314	0.07255	31.0891	-83.3802
315	0.075	31.0907	-83.3824
316	0.0702	31.0929	-83.3838
317	0.07555	31.0948	-83.3852
318	0.07215	31.0968	-83.3869
319	0.07515	31.0985	-83.3888
320	0.0767	31.1004	-83.3909
321	0.0782	31.1018	-83.393
322	0.07705	31.1032	-83.3951
323	0.07625	31.1049	-83.3972
324	0.0765	31.1068	-83.3992
325	0.07915	31.1087	-83.4016
326	0.07805	31.1098	-83.4031
327	0.0785	31.1124	-83.4039
328	0.0773	31.1131	-83.4072
329	0.0783	31.1137	-83.4108
330	0.07865	31.1147	-83.4138
331	0.07935	31.1171	-83.4148
332	0.0769	31.1196	-83.4153
333	0.078	31.1206	-83.4195
334	0.0789	31.12	-83.419
335	0.07565	31.1206	-83.4269
336	0.0751	31.121	-83.4303
337	0.0787	31.1215	-83.4357
338	0.08035	31.122	-83.4381
339	0.07715	31.1255	-83.4364
340	0.0762	31.1276	-83.4388
341	0.0747	31.1291	-83.4406
342	0.07895	31.1314	-83.4418
343	0.0833	31.1347	-83.441
344	0.07885	31.1356	-83.4448
345	0.07965	31.1377	-83.4458
346	0.08025	31.1402	-83.4467
347	0.0788	31.1416	-83.4494
348	0.07785	31.1428	-83.4516
349	0.0797	31.1442	-83.4542
350	0.08035	31.1457	-83.457
351	0.07935	31.147	-83.4595
352	0.07815	31.1481	-83.4628
353	0.07985	31.1531	-83.4596
354	0.07975	31.1574	-83.4581
355	0.08195	31.1654	-83.4507
356	0.07795	31.1681	-83.4517
357	0.0796	31.1702	-83.4537
358	0.081	31.172	-83.4551
359	0.08145	31.1738	-83.4567
360	0.08305	31.1754	-83.4589
361	0.0822	31.1765	-83.4618
362	0.0835	31.1775	-83.4647
363	0.0822	31.178	-83.4685
364	0.082	31.1792	-83.4713
365	0.08175	31.1801	-83.4746
366	0.08295	31.1806	-83.478
367	0.0809	31.1807	-83.4819
368	0.0809	31.1815	-83.4852
369	0.08625	31.1828	-83.4878
370	0.0844	31.1841	-83.4902
371	0.0822	31.1873	-83.4898
372	0.08355	31.1911	-83.4889
373	0.08185	31.1949	-83.4877
374	0.08515	31.1978	-83.4885
375	0.0828	31.1998	-83.4905
376	0.08145	31.2022	-83.4914
377	0.0758	31.2053	-83.4911
378	0.0832	31.2084	-83.4908
379	0.0819	31.2121	-83.4903
380	0.08525	31.2154	-83.4898
381	0.08165	31.2188	-83.4892
382	0.0872	31.2271	-83.4818
383	0.0794	31.2279	-83.4853
384	0.0768	31.2295	-83.4874
385	0.0787	31.2319	-83.4887
386	0.0804	31.2338	-83.4905
387	0.0811	31.2357	-83.4923
388	0.077	31.2375	-83.494
389	0.0758	31.2392	-83.4956
390	0.0823	31.2411	-83.4972
391	0.0776	31.2436	-83.4985
392	0.07675	31.2454	-83.4995
393	0.0756	31.248	-83.5009
394	0.07145	31.2495	-83.5028
395	0.0698	31.2513	-83.5047
396	0.07585	31.2532	-83.506
397	0.07345	31.2542	-83.5088
398	0.06785	31.2548	-83.5119
399	0.06975	31.2551	-83.516
400	0.08165	31.2557	-83.5195
401	0.07975	31.2564	-83.5232
402	0.07865	31.257	-83.5265
403	0.0774	31.2574	-83.53
404	0.07905	31.2573	-83.5348
405	0.0824	31.2571	-83.5397
406	0.0796	31.2572	-83.5442
407	0.08295	31.2573	-83.548
408	0.08545	31.2575	-83.5523
409	0.08685	31.2582	-83.5558
410	0.08385	31.2591	-83.559
411	0.0904	31.2603	-83.5619
412	0.0904	31.2616	-83.5639
413	0.0884	31.2634	-83.5662
414	0.08175	31.2647	-83.5679
415	0.0861	31.2666	7e-06
416	0.08435	31.2678	-83.5726
417	0.0877	31.2688	-83.5755
418	0.08685	31.2701	-83.5785
419	0.0786	31.2705	-83.5818
420	0.08745	31.2679	-83.5901
421	0.0883	31.2689	-83.593
422	0.08885	31.2699	-83.5961
423	0.0884	31.2709	-83.5991
424	0.0927	31.272	-83.6018
425	0.08695	31.273	-83.6043
426	0.09545	31.2742	-83.6072
427	0.09725	31.2753	-83.6098
428	0.0915	31.2764	-83.6122
429	0.08575	31.2779	-83.6149
430	0.09125	31.279	-83.6173
431	0.08815	31.2803	-83.6198
432	0.08885	31.282	-83.6219
433	0.09425	31.2839	-83.6236
434	0.0994	31.2857	-83.6253
435	0.0992	31.2876	-83.6272
436	0.0956	31.2896	-83.6288
437	0.0982	31.2917	-83.6302
438	0.09835	31.2934	-83.6317
439	0.1	31.2953	-83.634
440	0.1	31.2969	-83.6356
441	0.10295	31.2989	-83.6373
442	0.0991	31.3007	-83.639
443	0.09115	31.3023	-83.6409
444	0.08865	31.3042	-83.6425
445	0.0947	31.3074	-83.6422
446	0.09545	31.3106	-83.6423
447	0.09665	31.3135	-83.6422
448	0.0971	31.3157	-83.6437
449	0.09815	31.3176	-83.6454
450	0.0941	31.3194	-83.6473
451	0.0958	31.3211	-83.649
452	0.09745	31.3229	-83.6507
453	0.0956	31.3245	-83.6525
454	0.09915	31.327	-83.6542
455	0.09925	31.33	-83.654
456	0.10115	31.3327	-83.6542
457	0.10065	31.3352	-83.6552
458	0.0977	31.3371	-83.6567
459	0.10365	31.3432	-83.6611
460	0.102	31.3456	-83.6627
461	0.1096	31.3474	-83.6643
462	0.1064	31.3496	-83.6655
463	0.10915	31.3516	-83.6669
464	0.10375	31.3534	-83.6684
465	0.1102	31.3577	-83.6711
466	0.1108	31.3599	-83.6726
467	0.10705	31.3618	-83.6743
468	0.1055	31.3636	-83.6761
469	0.10845	31.3654	-83.6782
470	0.10665	31.367	-83.6799
471	0.10675	31.3689	-83.6817
472	0.10395	31.3709	-83.6829
473	0.1013	31.3742	-83.6848
474	0.1051	31.3756	-83.6855
475	0.1087	31.378	-83.6866
476	0.11525	31.3802	-83.6884
477	0.114	31.3819	-83.6897
478	0.1165	31.3836	-83.6912
479	0.11445	31.386	-83.6935
480	0.1177	31.3882	-83.6946
481	0.11685	31.3902	-83.6957
482	0.1173	31.3924	-83.6969
483	0.11635	31.3949	-83.6983
484	0.1185	31.3968	-83.6999
485	0.11825	31.399	-83.7014
486	0.1136	31.4007	-83.7029
487	0.11245	31.4029	-83.7044
488	0.1158	31.4051	-83.706
489	0.1165	31.407	-83.7076
490	0.1193	31.409	-83.7092
491	0.11735	31.4108	-83.711
492	0.11005	31.4129	-83.7127
493	0.1057	31.4145	-83.7141
494	0.1096	31.4164	-83.7155
495	0.1171	31.4186	-83.7171
496	0.1096	31.42	-83.7194
497	0.10885	31.4212	-83.7219
498	0.1078	31.4227	-83.7245
499	0.1027	31.4239	-83.7269
500	0.1096	31.4249	-83.7299
501	0.1113	31.4259	-83.7327
502	0.11495	31.427	-83.7357
503	0.11915	31.4284	-83.7383
504	0.1183	31.4297	-83.7407
505	0.1253	31.4311	-83.7429
506	0.11885	31.432	-83.7461
507	0.11925	31.433	-83.7488
508	0.11525	31.4339	-83.7519
509	0.1128	31.4348	-83.7553
510	0.1074	31.436	-83.7576
511	0.1018	31.4375	-83.7599
512	0.1057	31.4393	-83.7619
513	0.10645	31.4412	-83.7635
514	0.10955	31.443	-83.7651
515	0.1115	31.4448	-83.7669
516	0.11435	31.4468	-83.7687
517	0.1168	31.4491	-83.7699
518	0.1156	31.4515	-83.771
519	0.11815	31.4535	-83.772
520	0.11745	31.4561	-83.7732
521	0.12255	31.4588	-83.774
522	0.12105	31.461	-83.7749
523	0.123	31.4636	-83.7757
524	0.1158	31.466	-83.7765
525	0.1197	31.4681	-83.7783
526	0.1186	31.4694	-83.7806
527	0.1138	31.4709	-83.7827
528	0.10735	31.4732	-83.7839
529	0.1114	31.4761	-83.7844
530	0.1076	31.4783	-83.7853
531	0.1075	31.4806	-83.7867
532	0.1096	31.4824	-83.7883
533	0.1131	31.4845	-83.7898
534	0.11915	31.4865	-83.7909
535	0.12375	31.489	-83.7922
536	0.1157	31.4908	-83.794
537	0.1172	31.4927	-83.7958
538	0.1239	31.4946	-83.7971
539	0.1219	31.4972	-83.7979
540	0.12625	31.5	-83.7986
541	0.1258	31.5024	-83.7995
542	0.12105	31.5048	-83.8005
543	0.12005	31.5063	-83.8029
544	0.12145	31.5077	-83.8051
545	0.11115	31.5089	-83.8077
546	0.11255	31.5104	-83.8097
547	0.1185	31.5121	-83.8121
548	0.1286	31.5144	-83.8126
549	0.1199	31.5178	-83.8125
550	0.1228	31.5213	-83.8124
551	0.12415	31.5242	-83.8124
552	0.12385	31.5271	-83.8124
553	0.12935	31.5271	-83.8158
554	0.13655	31.5298	-83.8173
555	0.1303	31.5321	-83.8179
556	0.13015	31.5321	-83.8227
557	0.13005	31.5346	-83.8227
558	0.1294	31.5368	-83.8249
559	0.13345	31.5384	-83.828
560	0.1311	31.5397	-83.8292
561	0.13915	31.542	-83.8307
562	0.133	31.5449	-83.8307
563	0.1286	31.5484	-83.8307
564	0.1313	31.5507	-83.8309
565	0.1334	31.5509	-83.8359
566	0.1342	31.5508	-83.8407
567	0.13295	31.551	-83.8427
568	0.1352	31.5545	-83.8435
569	0.13665	31.5566	-83.8454
570	0.13445	31.5582	-83.8473
571	0.13565	31.5602	-83.849
572	0.13885	31.5625	-83.8502
573	0.1314	31.5645	-83.8517
574	0.1342	31.5665	-83.8532
575	0.1366	31.5689	-83.8541
576	0.1356	31.5719	-83.854
577	0.1378	31.5746	-83.8546
578	0.133	31.5772	-83.8552
579	0.12975	31.5796	-83.8567
580	0.13145	31.5816	-83.8579
581	0.1305	31.5835	-83.8595
582	0.1286	31.5857	-83.8606
583	0.13065	31.5879	-83.8619
584	0.12855	31.5903	-83.863
585	0.12275	31.5928	-83.8637
586	0.1182	31.5952	-83.8649
587	0.11245	31.5968	-83.8669
588	0.11265	31.5987	-83.8687
589	0.11795	31.6005	-83.8706
590	0.05325	31.6023	-83.8726
591	0.1081	31.6038	-83.8748
592	0.10505	31.6053	-83.8768
593	0.1026	31.6068	-83.879
594	0.0987	31.6082	-83.8813
595	0.09625	31.6098	-83.8835
596	0.0968	31.6115	-83.8859
597	0.09925	31.613	-83.8878
598	0.09585	31.6148	-83.8898
599	0.0986	31.6164	-83.8919
600	0.0972	31.6177	-83.8942
601	0.09645	31.6189	-83.8962
602	0.0972	31.6206	-83.8988
603	0.0941	31.6218	-83.9016
604	0.09245	31.6244	-83.906
605	0.09225	31.6243	-83.9074
606	0.09295	31.6244	-83.911
607	0.0961	31.6244	-83.9154
608	0.0909	31.6245	-83.9194
609	0.0929	31.6245	-83.924
610	0.09295	31.6246	-83.9281
611	0.0832	31.6246	-83.9324
612	0.08335	31.6247	-83.9368
613	0.0907	31.6247	-83.941
614	0.0897	31.6248	-83.945
615	0.0845	31.6275	-83.9453
616	0.08845	31.6308	-83.9453
617	0.08805	31.6336	-83.9452
618	0.0885	31.6371	-83.9452
619	0.0848	31.6403	-83.9451
620	0.0906	31.6434	-83.9451
621	0.09105	31.6465	-83.945
622	0.09055	31.6497	-83.945
623	0.088	31.6525	-83.9449
624	0.0973	31.655	-83.945
625	0.08715	31.6573	-83.9469
626	0.0801	31.6577	-83.9504
627	0.081	31.6578	-83.9545
628	0.0842	31.6578	-83.9596
629	0.08355	31.6611	-83.9596
630	0.07915	31.6642	-83.9596
631	0.07635	31.667	-83.9598
632	0.082	31.6696	-83.9609
633	0.074	31.6713	-83.9623
634	0.0823	31.6732	-83.9639
635	0.07955	31.6766	-83.9639
636	0.0852	31.6795	-83.9639
637	0.08345	31.6858	-83.9638
638	0.08685	31.6891	-83.9638
639	0.08645	31.6919	-83.9638
640	0.0871	31.6947	-83.9639
641	0.08675	31.6963	-83.9664
642	0.0778	31.6972	-83.97
643	0.0848	31.6982	-83.9726
644	0.0799	31.7011	-83.9732
645	0.08485	31.7046	-83.9731
646	0.0842	31.7065	-83.9742
647	0.082	31.707	-83.9778
648	0.0802	31.707	-83.9829
649	0.0821	31.7071	-83.9863
650	0.08325	31.7075	-83.99
651	0.08555	31.7109	-83.9894
652	0.0828	31.7143	-83.9889
653	0.0735	31.7179	-83.9884
654	0.0804	31.7215	-83.9878
655	0.08065	31.7249	-83.9872
656	0.0833	31.7261	-83.9901
657	0.0827	31.7256	-83.9951
658	0.0828	31.725	-84.001
659	0.0901	31.7246	-84.005
660	0.08675	31.7248	-84.0095
661	0.08145	31.725	-84.0132
662	0.07215	31.7252	-84.017
663	0.07305	31.7254	-84.0212
664	0.07255	31.7255	-84.0249
665	0.07845	31.7259	-84.0313
666	0.0791	31.7259	-84.0311
667	0.08015	31.7261	-84.0365
668	0.0851	31.7263	-84.0409
669	0.08465	31.7265	-84.0448
670	0.0869	31.7268	-84.0482
671	0.08945	31.7271	-84.0527
672	0.0895	31.7275	-84.057
673	0.09065	31.7284	-84.0593
674	0.0908	31.7293	-84.0638
675	0.0897	31.732	-84.0643
676	0.0967	31.7366	-84.0628
677	0.0937	31.7394	-84.0625
678	0.0893	31.7418	-84.0635
679	0.0942	31.744	-84.0648
680	0.09605	31.7468	-84.0649
681	0.09615	31.75	-84.065
682	0.08905	31.7532	-84.0652
683	0.09165	31.7561	-84.0653
684	0.08805	31.7576	-84.0675
685	0.08815	31.7602	-84.0684
686	0.08845	31.7627	-84.0692
687	0.0888	31.766	-84.0702
688	0.08865	31.7677	-84.0707
689	0.0941	31.7706	-84.0711
690	0.0943	31.7734	-84.0716
691	0.0942	31.7758	-84.0724
692	0.0931	31.7783	-84.0736
693	0.09325	31.7788	-84.0771
694	0.09005	31.7782	-84.0822
695	0.09165	31.7785	-84.0862
696	0.08635	31.7792	-84.0896
697	0.08695	31.7799	-84.093
698	0.0889	31.78	-84.0965
699	0.0866	31.7771	-84.1033
700	0.08495	31.7733	-84.1131
701	0.08695	31.7732	-84.1171
702	0.08675	31.7732	-84.1205
703	0.0835	31.7732	-84.1248
704	0.0861	31.774	-84.1272
705	0.0846	31.776	-84.1298
706	0.0794	31.7779	-84.1324
707	0.0799	31.7789	-84.1338
708	0.0831	31.7839	-84.1337
709	0.0883	31.7899	-84.1294
710	0.0876	31.7961	-84.1252
711	0.09255	31.8033	-84.1202
712	0.09065	31.8091	-84.1169
713	0.09025	31.8143	-84.1137
714	0.09645	31.8201	-84.1104
715	0.09255	31.8213	-84.1131
716	0.0886	31.8225	-84.1162
717	0.0908	31.8235	-84.1191
718	0.09255	31.8246	-84.1216
719	0.0911	31.8258	-84.1242
720	0.0867	31.8272	-84.127
721	0.089	31.8286	-84.129
722	0.0908	31.8302	-84.1311
723	0.0919	31.8321	-84.1327
724	0.09325	31.8342	-84.1339
725	0.09585	31.8365	-84.1353
726	0.0926	31.8386	-84.1367
727	0.0895	31.8407	-84.1379
728	0.0911	31.8429	-84.1393
729	0.0901	31.8454	-84.1403
730	0.09345	31.8476	-84.1415
731	0.0904	31.8491	-84.1439
732	0.08275	31.8503	-84.1464
733	0.08755	31.8515	-84.149
734	0.08815	31.8529	-84.1515
735	0.0927	31.8543	-84.1537
736	0.09765	31.8558	-84.156
737	0.09535	31.8579	-84.1582
738	0.09135	31.8594	-84.1597
739	0.10595	31.8617	-84.1613
740	0.0965	31.8636	-84.1626
741	0.09895	31.8651	-84.1645
742	0.09475	31.8669	-84.1667
743	0.09625	31.8686	-84.1688
744	0.09515	31.8702	-84.1709
745	0.09435	31.8716	-84.1732
746	0.09685	31.8729	-84.1753
747	0.09745	31.8748	-84.1776
748	0.0949	31.8763	-84.1795
749	0.09735	31.8779	-84.1814
750	0.0958	31.88	-84.1831
751	0.0964	31.8822	-84.1846
752	0.0986	31.8844	-84.1852
753	0.0953	31.8872	-84.1859
754	0.0932	31.89	-84.1864
755	0.09325	31.8928	-84.1867
756	0.09555	31.8958	-84.1869
757	0.0958	31.8983	-84.1881
758	0.0957	31.8971	-84.1938
759	0.0975	31.8936	-84.2033
760	0.10705	31.8935	-84.2077
761	0.1107	31.8936	-84.2121
762	0.11235	31.8952	-84.2139
763	0.11275	31.8972	-84.2153
764	0.11315	31.8994	-84.2168
765	0.1131	31.9016	-84.2182
766	0.11375	31.9035	-84.2196
767	0.1182	31.9053	-84.2212
768	0.112	31.9086	-84.2213
769	0.1129	31.911	-84.2224
770	0.10685	31.9129	-84.2238
771	0.1132	31.915	-84.2253
772	0.12575	31.9172	-84.2267
773	0.12055	31.9191	-84.2285
774	0.11685	31.9214	-84.2293
775	0.11635	31.9238	-84.2302
776	0.1237	31.9263	-84.2312
777	0.12075	31.9285	-84.2325
778	0.1173	31.9307	-84.2339
779	0.1139	31.9327	-84.2353
780	0.1096	31.9348	-84.2369
781	0.112	31.9369	-84.2386
782	0.11425	31.939	-84.2399
783	0.11355	31.9405	-84.2418
784	0.12215	31.9426	-84.2434
785	0.12205	31.9446	-84.2446
786	0.11525	31.947	-84.2459
787	0.11445	31.9485	-84.2478
788	0.1215	31.9486	-84.2518
789	0.11665	31.949	-84.2554
790	0.11285	31.9521	-84.2554
791	0.11315	31.9554	-84.2554
792	0.11625	31.9569	-84.2577
793	0.12025	31.9572	-84.2617
794	0.12375	31.9605	-84.2616
795	0.12035	31.9637	-84.2614
796	0.12525	31.9651	-84.264
797	0.12235	31.9671	-84.2655
798	0.1218	31.9704	-84.2653
799	0.1179	31.9736	-84.2651
800	0.11285	31.9781	-84.2636
801	0.1089	31.9817	-84.2627
802	0.1166	31.9843	-84.2632
803	0.116	31.987	-84.2638
804	0.1155	31.9896	-84.2645
805	0.11115	31.9927	-84.2646
806	0.1246	31.9954	-84.265
807	0.1179	31.9974	-84.2667
808	0.12715	31.9994	-84.2683
809	0.12215	32.0017	-84.2694
810	0.12145	32.0041	-84.2704
811	0.12365	32.0065	-84.2715
812	0.1259	32.0065	-84.2757
813	0.1271	32.0067	-84.28
814	0.1331	32.0069	-84.284
815	0.13	32.007	-84.2881
816	0.13675	32.0069	-84.2924
817	0.1349	32.0072	-84.2966
818	0.13485	32.0073	-84.3009
819	0.1316	32.0075	-84.3048
820	0.1223	32.0091	-84.3067
821	0.13225	32.0083	-84.312
822	0.13975	32.0097	-84.3146
823	0.13725	32.013	-84.3145
824	0.13315	32.0161	-84.3144
825	0.1332	32.0193	-84.3143
826	0.1334	32.0227	-84.3139
827	0.1364	32.0243	-84.3161
828	0.13665	32.0244	-84.3202
829	0.1496	32.0244	-84.3243
830	0.14695	32.0245	-84.3288
831	0.14165	32.0247	-84.3328
832	0.14465	32.0247	-84.337
833	0.14375	32.0249	-84.3412
834	0.1402	32.025	-84.3455
835	0.145	32.0251	-84.3496
836	0.15315	32.0252	-84.354
837	0.15245	32.028	-84.3539
838	0.1526	32.0312	-84.3538
839	0.15745	32.0365	-84.3507
840	0.1463	32.0441	-84.3438
841	0.1488	32.0474	-84.3445
842	0.1487	32.0476	-84.3481
843	0.153	32.0476	-84.3522
844	0.1566	32.0476	-84.357
845	0.1524	32.0478	-84.3616
846	0.16005	32.0479	-84.3657
847	0.1606	32.048	-84.3706
848	0.1599	32.0481	-84.3733
849	0.15855	32.0498	-84.3758
850	0.15975	32.05	-84.3799
851	0.1605	32.05	-84.3843
852	0.1607	32.0499	-84.3883
853	0.15865	32.0544	-84.3863
854	0.16245	32.0605	-84.3825
855	0.16275	32.0655	-84.3797
856	0.16485	32.0691	-84.3795
857	0.164	32.0725	-84.3789
858	0.1686	32.0758	-84.3786
859	0.1668	32.0792	-84.3781
860	0.171	32.0829	-84.3777
861	0.1675	32.086	-84.3776
862	0.1677	32.0891	-84.3775
863	0.16745	32.0924	-84.3773
864	0.1648	32.0955	-84.3772
865	0.1603	32.0982	-84.3778
866	0.16175	32.1007	-84.3787
867	0.1641	32.1033	-84.3795
868	0.16275	32.106	-84.38
869	0.16215	32.1088	-84.3804
870	0.1604	32.1116	-84.3808
871	0.15825	32.1146	-84.3812
872	0.15715	32.117	-84.3825
873	0.1542	32.1168	-84.3866
874	0.16325	32.117	-84.3909
875	0.14875	32.1168	-84.3961
876	0.1439	32.1168	-84.3997
877	0.1579	32.1141	-84.4079
878	0.16545	32.1142	-84.4122
879	0.17135	32.1173	-84.4122
880	0.17855	32.1203	-84.4121
881	0.172	32.1236	-84.412
882	0.16485	32.1266	-84.412
883	0.17365	32.1298	-84.4119
884	0.17455	32.133	-84.4118
885	0.17255	32.1362	-84.4118
886	0.172	32.1394	-84.4117
887	0.1734	32.1425	-84.4117
888	0.1756	32.1457	-84.4115
889	0.1697	32.1484	-84.4124
890	0.17085	32.1491	-84.4156
891	0.17315	32.1497	-84.419
892	0.17525	32.1507	-84.422
893	0.1738	32.1523	-84.4239
894	0.17665	32.1542	-84.4256
895	0.17165	32.1565	-84.4268
896	0.182	32.1589	-84.4279
897	0.1865	32.1613	-84.4289
898	0.1907	32.1636	-84.43
899	0.1886	32.1654	-84.4319
900	0.1895	32.1668	-84.4344
901	0.1889	32.1685	-84.4361
902	0.188	32.1705	-84.4378
903	0.18625	32.1726	-84.4393
904	0.1867	32.1747	-84.4407
905	0.18465	32.1768	-84.442
906	0.18595	32.1786	-84.4438
907	0.1854	32.1804	-84.4459
908	0.1818	32.1819	-84.448
909	0.1863	32.1833	-84.4504
910	0.18	32.1848	-84.4526
911	0.1834	32.1865	-84.4546
912	0.19135	32.1882	-84.4565
913	0.18775	32.19	-84.4584
914	0.1842	32.1916	-84.4603
915	0.182	32.1934	-84.4621
916	0.1825	32.1953	-84.4641
917	0.1841	32.197	-84.4661
918	0.1848	32.1984	-84.4684
919	0.1858	32.1998	-84.4708
920	0.1853	32.2012	-84.4733
921	0.18995	32.2026	-84.4756
922	0.1932	32.2043	-84.4775
923	0.1981	32.2063	-84.4791
924	0.19405	32.2092	-84.4838
925	0.1936	32.2105	-84.4864
926	0.19695	32.2116	-84.4891
927	0.1922	32.2132	-84.4914
928	0.19315	32.2147	-84.4935
929	0.1978	32.2164	-84.4956
930	0.19345	32.2186	-84.4968
931	0.19555	32.2207	-84.498
932	0.19405	32.2231	-84.4991
933	0.19555	32.2253	-84.5003
934	0.19565	32.2281	-84.5006
935	0.19645	32.2313	-84.5007
936	0.2007	32.2339	-84.5014
937	0.19905	32.2362	-84.5025
938	0.2012	32.2384	-84.5039
939	0.20725	32.2405	-84.5053
940	0.20155	32.2412	-84.5089
941	0.1973	32.2412	-84.5132
942	0.17775	32.2412	-84.5176
943	0.1699	32.241	-84.5217
944	0.16875	32.2411	-84.5262
945	0.17545	32.2412	-84.5305
946	0.16995	32.2412	-84.5348
947	0.16515	32.2413	-84.539
948	0.17505	32.2413	-84.5434
949	0.17085	32.2394	-84.5502
950	0.1544	32.2409	-84.5522
951	0.14445	32.2435	-84.5541
952	0.1561	32.2451	-84.5552
953	0.1663	32.2471	-84.5569
954	0.18415	32.2486	-84.559
955	0.18845	32.2502	-84.5612
956	0.18685	32.252	-84.5629
957	0.1752	32.2552	-84.5628
958	0.18415	32.2583	-84.5627
959	0.18515	32.2596	-84.5656
960	0.1699	32.2585	-84.5713
961	0.14735	32.2555	-84.5799
962	0.16905	32.2545	-84.5854
963	0.17435	32.2557	-84.5882
964	0.175	32.2568	-84.591
965	0.17925	32.2573	-84.5948
966	0.18075	32.2572	-84.5992
967	0.185	32.2551	-84.6063
968	0.1933	32.254	-84.6122
969	0.19035	32.2543	-84.6162
970	0.1937	32.2549	-84.6197
971	0.19515	32.2579	-84.6199
972	0.20345	32.2602	-84.6211
973	0.20285	32.2622	-84.6225
974	0.19755	32.2644	-84.6239
975	0.2012	32.2678	-84.6232
976	0.1977	32.2706	-84.6237
977	0.2035	32.2726	-84.6252
978	0.2096	32.2742	-84.6275
979	0.2027	32.276	-84.6294
980	0.2011	32.2781	-84.6306
981	0.2061	32.2826	-84.6343
982	0.1533	32.2911	-84.6214
983	0.153	32.2924	-84.6241
984	0.1687	32.3002	-84.6173
985	0.1768	32.3035	-84.617
986	0.1785	32.3048	-84.6198
987	0.1822	32.3054	-84.6233
988	0.1783	32.306	-84.6268
989	0.17625	32.3067	-84.63
990	0.1669	32.3073	-84.6334
991	0.1821	32.308	-84.6373
992	0.18145	32.3085	-84.6406
993	0.1859	32.3089	-84.6445
994	0.18885	32.3092	-84.6484
995	0.20305	32.3094	-84.6524
996	0.2106	32.3112	-84.6542
997	0.1983	32.3136	-84.6552
998	0.20405	32.3164	-84.6556
999	0.20545	32.3215	-84.6532
1000	0.2089	32.3238	-84.6539
1001	0.21005	32.3255	-84.6561
1002	0.21495	32.3269	-84.6584
1003	0.21645	32.3295	-84.6593
1004	0.22655	32.3323	-84.6594
1005	0.2239	32.3357	-84.6593
1006	0.2273	32.3426	-84.654
1007	0.22305	32.3474	-84.6515
1008	0.22525	32.3508	-84.6512
1009	0.2231	32.3541	-84.6511
1010	0.2293	32.3593	-84.6481
1011	0.2246	32.3626	-84.6479
1012	0.23145	32.3648	-84.6492
1013	0.22045	32.3672	-84.6503
1014	0.2263	32.3687	-84.6525
1015	0.224	32.3704	-84.6545
1016	0.23345	32.372	-84.6566
1017	0.2218	32.3731	-84.6597
1018	0.2327	32.3718	-84.6656
1019	0.2166	32.373	-84.6682
1020	0.21725	32.3744	-84.6706
1021	0.2228	32.3758	-84.6729
1022	0.22815	32.3773	-84.6752
1023	0.22155	32.3792	-84.6768
1024	0.21685	32.3811	-84.6785
1025	0.2012	32.383	-84.6802
1026	0.1854	32.385	-84.682
1027	0.1853	32.3869	-84.6835
1028	0.1764	32.3888	-84.6851
1029	0.17995	32.3911	-84.6864
1030	0.1702	32.3932	-84.6877
1031	0.16465	32.3954	-84.6891
1032	0.1624	32.3972	-84.6909
1033	0.16965	32.3989	-84.6929
1034	0.16985	32.4006	-84.6948
1035	0.16525	32.4028	-84.6961
1036	0.16135	32.4052	-84.6974
1037	0.16755	32.4074	-84.6985
1038	0.16935	32.4096	-84.6998
1039	0.16245	32.4113	-84.7014
1040	0.1597	32.413	-84.7038
1041	0.14945	32.4146	-84.7059
1042	0.1493	32.4163	-84.708
1043	0.15445	32.4178	-84.7101
1044	0.1565	32.4194	-84.7122
1045	0.16105	32.421	-84.7143
1046	0.1662	32.4226	-84.7164
1047	0.16425	32.4245	-84.718
1048	0.1647	32.4267	-84.7195
1049	0.1593	32.4287	-84.7211
1050	0.1519	32.4301	-84.7236
1051	0.1504	32.4315	-84.7257
1052	0.13805	32.4334	-84.7275
1053	0.12475	32.4352	-84.7293
1054	0.11855	32.437	-84.7311
1055	0.10305	32.4388	-84.7327
1056	0.10395	32.4409	-84.7348
1057	0.1053	32.4426	-84.7364
1058	0.1212	32.4444	-84.7383
1059	0.12315	32.4455	-84.7411
1060	0.11215	32.4453	-84.7457
1061	0.1121	32.4451	-84.7507
1062	0.1013	32.4452	-84.7552
1063	0.10145	32.4456	-84.7595
1064	0.0944	32.4465	-84.7621
1065	0.0997	32.4469	-84.7652
1066	0.11555	32.4473	-84.769
1067	0.1246	32.4482	-84.772
1068	0.12515	32.4491	-84.7751
1069	0.1304	32.4501	-84.7782
1070	0.13365	32.451	-84.7809
1071	0.1271	32.4521	-84.7839
1072	0.11175	32.4533	-84.7865
1073	0.0957	32.4541	-84.7899
1074	0.09375	32.4544	-84.7937
1075	0.10535	32.4552	-84.7974
1076	0.1134	32.4558	-84.8005
1077	0.10795	32.4564	-84.8035
1078	0.1167	32.459	-84.8046
1079	0.11865	32.4614	-84.8056
1080	0.12585	32.4632	-84.8073
1081	0.1102	32.4706	-84.8016
1082	0.11785	32.4736	-84.8016
1083	0.12435	32.4767	-84.8018
1084	0.11785	32.481	-84.8002
1085	0.12805	32.4842	-84.7999
1086	0.1296	32.4874	-84.8
1087	0.13575	32.4907	-84.7997
1088	0.13705	32.4934	-84.8005
1089	0.13755	32.4953	-84.8021
1090	0.1437	32.4976	-84.8031
1091	0.14785	32.5001	-84.804
1092	0.14725	32.5025	-84.805
1093	0.1449	32.5046	-84.8064
1094	0.14625	32.5063	-84.8083
1095	0.1543	32.5077	-84.8108
1096	0.1567	32.5095	-84.8127
1097	0.1593	32.5111	-84.8147
1098	0.15735	32.5129	-84.8167
1099	0.153	32.5146	-84.8187
1100	0.15505	32.5165	-84.8207
1101	0.16225	32.5174	-84.7819
1102	0.1621	32.5178	-84.8274
1103	0.15655	32.5182	-84.8311
1104	0.15385	32.5202	-84.8326
1105	0.1462	32.5223	-84.834
1106	0.1355	32.5243	-84.8355
1107	0.1288	32.5264	-84.837
1108	0.12085	32.5281	-84.8389
1109	0.1162	32.5304	-84.8401
1110	0.1162	32.5331	-84.8406
1111	0.11625	32.5364	-84.8404
1112	0.1242	32.5396	-84.8406
1113	0.1351	32.5435	-84.8403
1114	0.1456	32.5459	-84.8403
1115	0.1516	32.549	-84.8403
1116	0.1362	32.5522	-84.8403
1117	0.14805	32.5552	-84.8403
1118	0.1561	32.5584	-84.8402
1119	0.15375	32.5618	-84.8402
1120	0.16295	32.5648	-84.8402
1121	0.15745	32.5672	-84.8411
1122	0.14825	32.5664	-84.8466
1123	0.14035	32.5654	-84.8527
1124	0.15255	32.5611	-84.8611
1125	0.15135	32.5629	-84.8644
1126	0.1558	32.5651	-84.8657
1127	0.16905	32.5685	-84.8652
1128	0.16525	32.5721	-84.8646
1129	0.18295	32.5753	-84.8646
1130	0.1829	32.578	-84.8652
1131	0.185	32.5804	-84.8662
1132	0.18375	32.5826	-84.8675
1133	0.1903	32.5848	-84.8689
1134	0.19225	32.5871	-84.87
1135	0.1945	32.5893	-84.8712
1136	0.19635	32.5917	-84.8723
1137	0.20245	32.5939	-84.8733
1138	0.2099	32.5962	-84.8747
1139	0.21035	32.5984	-84.876
1140	0.20625	32.5999	-84.8784
1141	0.20405	32.6025	-84.8789
1142	0.2018	32.6045	-84.8805
1143	0.2071	32.6065	-84.882
1144	0.2049	32.6086	-84.8834
1145	0.21425	32.6108	-84.8849
1146	0.2246	32.6128	-84.8865
1147	0.1933	32.6157	-84.891
1148	0.19075	32.6178	-84.8922
1149	0.18885	32.6198	-84.8943
1150	0.1958	32.6213	-84.8964
1151	0.1982	32.6219	-84.9
1152	0.1918	32.6219	-84.9031
1153	0.1901	32.6236	-84.906
1154	0.1866	32.6261	-84.9074
1155	0.1858	32.627	-84.9099
1156	0.1864	32.6285	-84.9123
1157	0.19075	32.6301	-84.9143
1158	0.19365	32.6313	-84.9172
1159	0.1916	32.6298	-84.9223
1160	0.20565	32.6305	-84.9269
1161	0.204	32.6288	-84.9336
1162	0.2026	32.6264	-84.9388
1163	0.1877	32.6272	-84.9449
1164	0.1758	32.6282	-84.9475
1165	0.1722	32.6303	-84.9488
1166	0.1739	32.6329	-84.9496
1167	0.17445	32.6353	-84.9505
1168	0.1699	32.6376	-84.9517
1169	0.1702	32.64	-84.9527
1170	0.1633	32.6427	-84.9534
1171	0.17215	32.6466	-84.9523
1172	0.17735	32.6501	-84.9519
1173	0.18515	32.6523	-84.9531
1174	0.1861	32.6547	-84.954
1175	0.18665	32.6572	-84.955
1176	0.19085	32.6596	-84.956
1177	0.2001	32.6618	-84.9573
1178	0.2044	32.6639	-84.9586
1179	0.2079	32.6655	-84.9609
1180	0.2012	32.6667	-84.9636
1181	0.2099	32.6676	-84.9666
1182	0.20875	32.6681	-84.9704
1183	0.2133	32.6687	-84.9739
1184	0.20865	32.6696	-84.9767
1185	0.20685	32.6712	-84.9795
1186	0.20635	32.673	-84.9808
1187	0.19985	32.6751	-84.9821
1188	0.2039	32.6766	-84.9848
1189	0.2119	32.68	-84.9845
1190	0.19985	32.683	-84.9845
1191	0.18895	32.6856	-84.9855
1192	0.18375	32.6873	-84.9865
1193	0.17715	32.6887	-84.9872

## Sheet: Line1_ArrivalPicks
Shot Number	Instrument Number	Arrival Type	Distance (km)	Pick Time (s)	Pick Uncertainty (s)
1	865	3	229.548	14.9237	0.075
1	866	3	229.808	14.8648	0.075
1	867	3	230.078	14.7914	0.075
1	868	3	230.336	14.7415	0.075
1	869	3	230.6	14.6908	0.075
1	874	3	231.931	14.4142	0.075
1	876	3	232.462	14.2959	0.075
1	877	3	232.744	14.2095	0.075
1	878	3	233.009	14.1485	0.075
1	880	3	233.526	14.0561	0.075
1	881	3	233.792	14.0042	0.075
1	883	3	234.311	13.9069	0.075
1	885	3	234.835	13.7856	0.075
1	886	3	235.093	13.7255	0.075
1	903	3	239.579	12.9736	0.075
1	904	3	239.835	12.9253	0.075
1	905	3	240.098	12.8762	0.075
1	906	3	240.36	12.8318	0.075
1	907	3	240.635	12.7766	0.075
1	908	3	240.898	12.7297	0.075
1	909	3	241.164	12.6826	0.075
1	913	3	242.226	12.5011	0.075
1	915	3	242.736	12.4234	0.075
1	916	3	243.019	12.3741	0.075
1	917	3	243.285	12.3246	0.075
1	918	3	243.545	12.2781	0.075
1	919	3	243.817	12.2302	0.075
1	921	3	244.348	12.1522	0.075
1	922	3	244.602	12.1135	0.075
1	923	3	244.87	12.0591	0.075
1	924	3	245.409	11.9778	0.075
1	925	3	245.674	11.9308	0.075
1	928	3	246.471	11.7638	0.075
1	930	3	247.002	11.6487	0.075
1	932	3	247.52	11.577	0.075
1	963	3	255.68	10.282	0.075
1	964	3	255.938	10.2381	0.075
1	965	3	256.206	10.1977	0.075
1	966	3	256.444	10.1726	0.075
1	967	3	256.659	10.1364	0.075
1	968	3	256.888	10.1101	0.075
1	971	3	257.669	10.0032	0.075
1	972	3	257.938	9.958	0.075
1	973	3	258.199	9.9114	0.075
1	974	3	258.479	9.8694	0.075
1	975	3	258.746	9.8291	0.075
1	976	3	259.023	9.7852	0.075
1	977	3	259.285	9.7571	0.075
1	978	3	259.555	9.7187	0.075
1	980	3	260.081	9.6204	0.075
1	987	3	262.063	9.317	0.075
1	988	3	262.321	9.2615	0.075
1	989	3	262.568	9.1958	0.075
1	990	3	262.82	9.1388	0.075
1	991	3	263.11	9.1025	0.075
1	1006	3	267.088	8.491	0.075
1	1007	3	267.352	8.4742	0.075
1	1008	3	267.624	8.4333	0.075
1	1009	3	267.899	8.3687	0.075
1	1010	3	268.149	8.3235	0.075
1	1011	3	268.412	8.286	0.075
1	1012	3	268.68	8.2409	0.075
1	1013	3	268.945	8.2008	0.075
1	1014	3	269.207	8.1565	0.075
1	1015	3	269.473	8.1232	0.075
1	1016	3	269.739	8.0784	0.075
1	1018	3	270.283	7.9802	0.075
1	1019	3	270.541	7.9317	0.075
1	1020	3	270.805	7.8824	0.075
1	1022	3	271.334	7.814	0.075
1	1025	3	272.122	7.6551	0.075
1	1027	3	272.652	7.5331	0.075
1	1029	3	273.183	7.4621	0.075
1	1030	3	273.442	7.4112	0.075
1	1031	3	273.704	7.3645	0.075
1	1032	3	273.972	7.3124	0.075
1	1034	3	274.501	7.244	0.075
1	1035	3	274.765	7.2063	0.075
1	1036	3	275.044	7.154	0.075
1	1037	3	275.3	7.1197	0.075
1	1038	3	275.563	7.0729	0.075
1	1040	3	276.093	6.9765	0.075
1	1041	3	276.354	6.923	0.075
1	1042	3	276.629	6.8723	0.075
1	1043	3	276.884	6.8335	0.075
1	1044	3	277.15	6.7956	0.075
1	1045	3	277.414	6.7626	0.075
1	1046	3	277.675	6.7253	0.075
1	1047	3	277.937	6.6601	0.075
1	1048	3	278.21	6.619	0.075
1	1049	3	278.477	6.5694	0.075
1	1050	3	278.75	6.5167	0.075
1	1051	3	278.992	6.4841	0.075
1	1052	3	279.263	6.4316	0.075
1	1053	3	279.524	6.3828	0.075
1	1054	3	279.792	6.3307	0.075
1	1055	3	280.04	6.2858	0.075
1	1056	3	280.341	6.2272	0.075
1	1057	3	280.585	6.1828	0.075
1	1058	3	280.857	6.1418	0.075
1	1059	3	281.122	6.1064	0.075
1	1060	3	281.384	6.0574	0.075
1	1061	3	281.665	5.999	0.075
1	1062	3	281.946	5.9523	0.075
1	1064	3	282.466	5.8664	0.075
1	1065	3	282.678	5.8213	0.075
1	1066	3	282.931	5.7897	0.075
1	1067	3	283.181	5.7561	0.075
1	1068	3	283.436	5.708	0.075
1	1069	3	283.697	5.6731	0.075
1	1070	3	283.936	5.6339	0.075
1	1071	3	284.197	5.592	0.075
1	1072	3	284.449	5.5187	0.075
1	1073	3	284.703	5.4742	0.075
1	1074	3	284.942	5.4373	0.075
1	1075	3	285.208	5.3902	0.075
1	1076	3	285.433	5.3411	0.075
1	1077	3	285.642	5.3197	0.075
1	1078	3	285.94	5.2708	0.075
1	1079	3	286.213	5.2204	0.075
1	1080	3	286.477	5.1828	0.075
1	1081	3	286.838	5.1237	0.075
1	1082	3	287.107	5.0901	0.075
1	1083	3	287.391	5.0337	0.075
1	1084	3	287.691	4.9823	0.075
1	1085	3	287.956	4.9445	0.075
1	1086	3	288.239	4.9022	0.075
1	1087	3	288.501	4.8625	0.075
1	1088	3	288.786	4.8152	0.075
1	1089	3	289.043	4.7692	0.075
1	1090	3	289.301	4.7207	0.075
1	1091	3	289.567	4.6781	0.075
1	1092	3	289.83	4.636	0.075
1	1093	3	290.097	4.5887	0.075
1	1094	3	290.357	4.5422	0.075
1	1095	3	290.632	4.4939	0.075
1	1097	3	291.157	4.4028	0.075
1	1098	3	291.423	4.3556	0.075
1	1099	3	291.686	4.3134	0.075
1	1100	3	291.974	4.2728	0.075
1	1104	3	292.989	4.1227	0.075
1	1105	3	293.259	4.0657	0.075
1	1106	3	293.524	4.0187	0.075
1	1107	3	293.795	3.9639	0.075
1	1108	3	294.051	3.904	0.075
1	1110	3	294.584	3.7631	0.075
1	1111	3	294.856	3.7314	0.075
1	1113	3	295.453	3.6684	0.075
1	1114	3	295.659	3.6427	0.075
1	1115	3	295.913	3.6132	0.075
1	1116	3	296.176	3.5734	0.075
1	1117	3	296.424	3.5331	0.075
1	1118	3	296.67	3.4838	0.075
1	1119	3	296.946	3.4423	0.075
1	1120	3	297.183	3.4034	0.075
1	1121	3	297.427	3.3636	0.075
1	1122	3	297.727	3.3099	0.075
1	1123	3	298.045	3.2562	0.075
1	1124	3	298.211	3.2331	0.075
1	1125	3	298.565	3.1796	0.075
1	1126	3	298.829	3.135	0.075
1	1127	3	299.091	3.0953	0.075
1	1128	3	299.351	3.0372	0.075
1	1129	3	299.611	2.9931	0.075
1	1130	3	299.871	2.9513	0.075
1	1131	3	300.128	2.9238	0.075
1	1132	3	300.39	2.8841	0.075
1	1133	3	300.655	2.8556	0.075
1	1134	3	300.909	2.8053	0.075
1	1135	3	301.161	2.7692	0.075
1	1136	3	301.419	2.7276	0.075
1	1137	3	301.666	2.6828	0.075
1	1138	3	301.935	2.6353	0.075
1	1139	3	302.194	2.5936	0.075
1	1141	3	302.703	2.5091	0.075
1	1142	3	302.967	2.4738	0.075
1	1143	3	303.217	2.4123	0.075
1	1144	3	303.477	2.3729	0.075
1	1146	3	303.998	2.2776	0.075
1	1147	3	304.53	2.2034	0.075
1	1148	3	304.774	2.1685	0.075
1	1149	3	305.057	2.1181	0.075
1	1150	3	305.318	2.0768	0.075
1	1151	3	305.625	2.0191	0.075
1	1152	3	305.838	1.9903	0.075
1	1153	3	306.161	1.9499	0.075
1	1154	3	306.451	1.9029	0.075
1	1155	3	306.69	1.8644	0.075
1	1156	3	306.972	1.814	0.075
1	1157	3	307.227	1.7735	0.075
1	1158	3	307.517	1.7157	0.075
1	1159	3	307.742	1.6811	0.075
1	1160	3	308.091	1.6203	0.075
1	1161	3	308.348	1.5881	0.075
1	1162	3	308.409	1.574	0.075
1	1163	3	308.785	1.5206	0.075
1	1164	3	309.003	1.4782	0.075
1	1165	3	309.268	1.4386	0.075
1	1166	3	309.557	1.381	0.075
1	1167	3	309.832	1.3423	0.075
1	1168	3	310.112	1.2986	0.075
1	1169	3	310.385	1.2386	0.075
1	1170	3	310.677	1.2021	0.075
1	1171	3	310.972	1.1329	0.075
1	1172	3	311.262	1.073	0.075
1	1173	3	311.528	1.0268	0.075
1	1174	3	311.787	0.9836	0.075
1	1175	3	312.054	0.9352	0.075
1	1176	3	312.312	0.8878	0.075
1	1177	3	312.574	0.8421	0.075
1	1178	3	312.829	0.7973	0.075
1	1179	3	313.106	0.7519	0.075
1	1180	3	313.378	0.7028	0.075
1	1181	3	313.644	0.6631	0.075
1	1182	3	313.907	0.6259	0.075
1	1183	3	314.145	0.5832	0.075
1	1184	3	314.351	0.5618	0.075
1	1185	3	314.618	0.5284	0.075
1	1186	3	314.846	0.4956	0.075
1	1187	3	315.11	0.4518	0.075
1	1188	3	315.325	0.4012	0.075
1	1189	3	315.696	0.3376	0.075
1	1190	3	316.012	0.2787	0.075
1	1191	3	316.316	0.2256	0.075
1	1192	3	316.404	0.2146	0.075
1	1193	3	316.243	0.2283	0.075
1	627	3	166.355	25.4174	0.075
1	630	3	167.215	25.2914	0.075
1	631	3	167.461	25.242	0.075
1	633	3	167.982	25.1444	0.075
1	634	3	168.243	25.0886	0.075
1	636	3	168.775	25.0035	0.075
1	677	3	179.867	23.1306	0.075
1	679	3	180.405	23.0308	0.075
1	680	3	180.652	22.9953	0.075
1	681	3	180.934	22.9601	0.075
1	683	3	181.464	22.8845	0.075
1	684	3	181.728	22.8237	0.075
1	686	3	182.266	22.7379	0.075
1	688	3	182.786	22.6403	0.075
1	690	3	183.318	22.5123	0.075
1	691	3	183.579	22.4565	0.075
1	693	3	184.114	22.3617	0.075
1	694	3	184.379	22.2961	0.075
1	696	3	184.907	22.2034	0.075
1	697	3	185.175	22.1374	0.075
1	699	3	185.558	22.0895	0.075
1	701	3	186.041	22.0106	0.075
1	703	3	186.503	21.9436	0.075
1	758	3	201.278	19.7378	0.075
1	761	3	202.089	19.6271	0.075
1	762	3	202.338	19.5891	0.075
1	764	3	202.865	19.5023	0.075
1	766	3	203.39	19.432	0.075
1	768	3	203.925	19.3481	0.075
1	769	3	204.199	19.3045	0.075
1	770	3	204.445	19.2583	0.075
1	771	3	204.717	19.2166	0.075
1	772	3	204.989	19.1779	0.075
1	774	3	205.507	19.0992	0.075
1	777	3	206.298	18.9771	0.075
1	778	3	206.569	18.9386	0.075
1	780	3	207.104	18.8578	0.075
1	781	3	207.393	18.8132	0.075
1	782	3	207.64	18.7908	0.075
1	784	3	208.161	18.7103	0.075
1	789	3	209.434	18.5419	0.075
1	791	3	209.982	18.4641	0.075
1	793	3	210.521	18.3828	0.075
1	794	3	210.79	18.3413	0.075
1	798	3	211.854	18.1929	0.075
1	832	3	220.831	16.5116	0.075
1	833	3	221.097	16.4519	0.075
1	834	3	221.367	16.4182	0.075
1	835	3	221.62	16.3821	0.075
1	837	3	222.132	16.3093	0.075
1	838	3	222.402	16.2535	0.075
1	824	3	218.733	16.9017	0.075
1	827	3	219.524	16.7323	0.075
1	828	3	219.789	16.6948	0.075
1	829	3	220.04	16.6458	0.075
1	831	3	220.578	16.5741	0.075
1	823	3	218.475	16.934	0.075
1	826	3	219.255	16.788	0.075
1	825	3	218.995	16.8513	0.075
1	800	3	212.398	18.0463	0.075
1	801	3	212.653	17.9968	0.075
1	803	3	213.166	17.9327	0.075
1	807	3	214.209	17.745	0.075
1	808	3	214.477	17.6983	0.075
1	810	3	215.003	17.5928	0.075
1	809	3	214.739	17.6391	0.075
1	812	3	215.533	17.4913	0.075
1	799	3	212.119	18.0768	0.075
1	797	3	211.586	18.1831	0.075
1	796	3	211.331	18.237	0.075
1	795	3	211.056	18.2934	0.075
1	437	-4	115.41	33.3972	0.1
1	439	-4	115.956	33.3312	0.1
1	440	-4	116.183	33.2913	0.1
1	442	-4	116.714	33.2133	0.1
1	453	-4	119.572	32.8212	0.1
1	455	-4	120.133	32.7395	0.1
1	456	-4	120.381	32.6992	0.1
1	459	-4	121.694	32.5304	0.1
1	460	-4	122.001	32.4897	0.1
1	461	-4	122.249	32.4541	0.1
1	463	-4	122.768	32.3776	0.1
1	464	-4	123.004	32.3385	0.1
1	466	-4	123.821	32.2367	0.1
1	467	-4	124.082	32.1971	0.1
1	469	-4	124.628	32.1242	0.1
1	471	-4	125.142	32.0483	0.1
1	472	-4	125.382	32.0137	0.1
1	476	-4	126.506	31.8407	0.1
1	477	-4	126.735	31.8074	0.1
1	479	-4	127.319	31.7228	0.1
1	491	-4	130.5	31.2416	0.1
1	494	-4	131.246	31.157	0.1
1	496	-4	131.786	31.0941	0.1
1	497	-4	132.045	31.0641	0.1
1	499	-4	132.58	31.0115	0.1
1	500	-4	132.852	30.9702	0.1
1	502	-4	133.381	30.911	0.1
1	504	-4	133.917	30.8463	0.1
1	506	-4	134.444	30.7758	0.1
1	508	-4	134.958	30.7023	0.1
1	511	-4	135.746	30.5922	0.1
1	512	-4	136.021	30.5485	0.1
1	514	-4	136.53	30.4802	0.1
1	515	-4	136.799	30.4443	0.1
1	517	-4	137.343	30.374	0.1
1	525	-4	139.475	30.1005	0.1
1	528	-4	140.251	29.9965	0.1
1	529	-4	140.529	29.9316	0.1
1	530	-4	140.772	29.8896	0.1
1	532	-4	141.305	29.8114	0.1
1	534	-4	141.812	29.748	0.1
1	535	-4	142.099	29.7191	0.1
1	629	-4	166.949	26.5203	0.1
1	630	-4	167.215	26.4701	0.1
1	632	-4	167.748	26.3965	0.1
1	634	-4	168.243	26.3261	0.1
1	635	-4	168.526	26.2784	0.1
1	636	-4	168.775	26.2519	0.1
1	638	-4	169.571	26.1547	0.1
1	641	-4	170.338	26.0264	0.1
1	643	-4	170.883	25.9234	0.1
1	645	-4	171.451	25.8385	0.1
1	647	-4	171.943	25.7607	0.1
1	649	-4	172.476	25.715	0.1
1	651	-4	172.993	25.6394	0.1
1	653	-4	173.509	25.5905	0.1
1	656	-4	174.305	25.4864	0.1
1	658	-4	174.89	25.4156	0.1
1	661	-4	175.646	25.3217	0.1
1	662	-4	175.896	25.2898	0.1
1	663	-4	176.167	25.2566	0.1
1	664	-4	176.407	25.2173	0.1
1	665	-4	176.824	25.1669	0.1
1	666	-4	176.818	25.1659	0.1
1	668	-4	177.448	25.0958	0.1
1	669	-4	177.698	25.0646	0.1
1	671	-4	178.227	24.9915	0.1
1	672	-4	178.518	24.9581	0.1
1	677	-4	179.867	24.7663	0.1
1	679	-4	180.405	24.6937	0.1
1	680	-4	180.652	24.6698	0.1
1	681	-4	180.934	24.6329	0.1
1	683	-4	181.464	24.5799	0.1
1	685	-4	182.002	24.5226	0.1
1	687	-4	182.606	24.4557	0.1
1	689	-4	183.058	24.4045	0.1
1	691	-4	183.579	24.3294	0.1
1	695	-4	184.643	24.1895	0.1
1	697	-4	185.175	24.1346	0.1
1	698	-4	185.402	24.1301	0.1
1	701	-4	186.041	24.0595	0.1
1	704	-4	186.715	24.0031	0.1
1	706	-4	187.36	23.9411	0.1
1	708	-4	187.955	23.8498	0.1
1	711	-4	188.823	23.725	0.1
1	712	-4	189.112	23.6819	0.1
1	714	-4	189.655	23.6164	0.1
1	720	-4	191.248	23.408	0.1
1	722	-4	191.772	23.3332	0.1
1	723	-4	192.033	23.2843	0.1
1	725	-4	192.566	23.2021	0.1
1	726	-4	192.83	23.1638	0.1
1	727	-4	193.085	23.1226	0.1
1	728	-4	193.347	23.0736	0.1
1	729	-4	193.624	23.0344	0.1
1	732	-4	194.409	22.9316	0.1
1	771	-4	204.717	21.6662	0.1
1	773	-4	205.258	21.6077	0.1
1	775	-4	205.767	21.5599	0.1
1	777	-4	206.298	21.5094	0.1
1	779	-4	206.828	21.4613	0.1
1	780	-4	207.104	21.4381	0.1
1	782	-4	207.64	21.3983	0.1
1	784	-4	208.161	21.3582	0.1
1	786	-4	208.695	21.3027	0.1
1	788	-4	209.189	21.2591	0.1
1	789	-4	209.434	21.2376	0.1
1	790	-4	209.706	21.2172	0.1
1	792	-4	210.251	21.1649	0.1
1	794	-4	210.79	21.1134	0.1
1	795	-4	211.056	21.0847	0.1
1	796	-4	211.331	21.0594	0.1
1	800	-4	212.398	20.9623	0.1
1	578	-4	153.439	28.4613	0.1
1	585	-4	155.281	28.205	0.1
1	587	-4	155.813	28.1353	0.1
1	592	-4	157.137	27.9503	0.1
1	609	-4	161.669	27.3187	0.1
1	615	-4	163.221	27.0857	0.1
1	617	-4	163.736	26.9986	0.1
1	624	-4	165.537	26.7312	0.1
1	600	-4	159.255	27.6465	0.1
1	603	-4	160.062	27.5391	0.1
1	620	-4	164.556	26.8701	0.1
1	606	-4	160.864	27.4031	0.1
1	581	-4	154.233	28.3523	0.1
1	590	-4	156.619	28.0215	0.1
1	541	-4	143.687	29.5567	0.1
1	543	-4	144.23	29.4986	0.1
1	545	-4	144.739	29.4317	0.1
1	734	-4	194.949	22.8701	0.1
1	736	-4	195.463	22.8156	0.1
1	738	-4	195.999	22.7421	0.1
1	740	-4	196.529	22.6726	0.1
1	741	-4	196.794	22.6395	0.1
1	746	-4	198.098	22.496	0.1
1	749	-4	198.891	22.4131	0.1
1	750	-4	199.17	22.3783	0.1
1	754	-4	200.228	22.2623	0.1
1	752	-4	199.676	22.3345	0.1
1	757	-4	201.03	22.1555	0.1
1	762	-4	202.338	21.9758	0.1
1	765	-4	203.14	21.8788	0.1
1	766	-4	203.39	21.8378	0.1
1	769	-4	204.199	21.7399	0.1
1	744	-4	197.6	22.5615	0.1
3	608	3	161.383	17.3698	0.075
3	610	3	161.92	17.2701	0.075
3	612	3	162.455	17.1657	0.075
3	613	3	162.708	17.1059	0.075
3	615	3	163.211	16.9867	0.075
3	617	3	163.729	16.9079	0.075
3	618	3	164.025	16.8448	0.075
3	619	3	164.298	16.8133	0.075
3	622	3	165.084	16.6538	0.075
3	623	3	165.318	16.6107	0.075
3	625	3	165.847	16.4977	0.075
3	627	3	166.354	16.3874	0.075
3	629	3	166.948	16.2589	0.075
3	630	3	167.214	16.1647	0.075
3	636	3	168.776	15.9624	0.075
3	638	3	169.57	15.8634	0.075
3	640	3	170.045	15.7806	0.075
3	641	3	170.337	15.7018	0.075
3	643	3	170.883	15.6054	0.075
3	646	3	171.669	15.4697	0.075
3	648	3	172.263	15.4048	0.075
3	650	3	172.736	15.3644	0.075
3	654	3	173.771	15.1928	0.075
3	656	3	174.301	15.1031	0.075
3	658	3	174.89	15.0295	0.075
3	660	3	175.403	14.9794	0.075
3	662	3	175.896	14.899	0.075
3	664	3	176.405	14.8213	0.075
3	666	3	176.813	14.783	0.075
3	668	3	177.438	14.6814	0.075
3	670	3	177.911	14.5988	0.075
3	671	3	178.206	14.5071	0.075
3	673	3	178.703	14.3966	0.075
3	675	3	179.313	14.2828	0.075
3	677	3	179.848	14.1854	0.075
3	681	3	180.922	13.9995	0.075
3	683	3	181.457	13.8552	0.075
3	690	3	183.316	13.5548	0.075
3	692	3	183.853	13.4173	0.075
3	695	3	184.636	13.2936	0.075
3	696	3	184.898	13.2656	0.075
3	697	3	185.163	13.2348	0.075
3	698	3	185.387	13.2138	0.075
3	699	3	185.533	13.1886	0.075
3	700	3	185.77	13.1472	0.075
3	701	3	185.989	13.1316	0.075
3	702	3	186.187	13.1045	0.075
3	703	3	186.435	13.0641	0.075
3	704	3	186.644	13.0215	0.075
3	705	3	186.964	12.9721	0.075
3	706	3	187.285	12.9273	0.075
3	707	3	187.449	12.9021	0.075
3	709	3	188.177	12.7853	0.075
3	711	3	188.807	12.6597	0.075
3	712	3	189.104	12.6085	0.075
3	713	3	189.358	12.5556	0.075
3	715	3	189.916	12.4741	0.075
3	719	3	190.981	12.3175	0.075
3	721	3	191.508	12.2399	0.075
3	723	3	192.03	12.1723	0.075
3	726	3	192.828	12.0421	0.075
3	735	3	195.194	11.6097	0.075
3	737	3	195.775	11.5347	0.075
3	739	3	196.285	11.4522	0.075
3	741	3	196.791	11.3491	0.075
3	742	3	197.056	11.3253	0.075
3	744	3	197.596	11.2555	0.075
3	746	3	198.093	11.1581	0.075
3	748	3	198.635	11.0927	0.075
3	751	3	199.449	10.9652	0.075
3	761	3	202.065	10.6053	0.075
3	762	3	202.314	10.5859	0.075
3	763	3	202.564	10.5406	0.075
3	766	3	203.369	10.4259	0.075
3	768	3	203.908	10.321	0.075
3	769	3	204.183	10.2866	0.075
3	770	3	204.43	10.237	0.075
3	771	3	204.703	10.1911	0.075
3	772	3	204.976	10.1605	0.075
3	773	3	205.245	10.1128	0.075
3	774	3	205.495	10.0675	0.075
3	776	3	206.03	9.9842	0.075
3	778	3	206.562	9.913	0.075
3	780	3	207.098	9.839	0.075
3	781	3	207.386	9.7983	0.075
3	782	3	207.635	9.7695	0.075
3	784	3	208.156	9.6856	0.075
3	785	3	208.404	9.6593	0.075
3	787	3	208.935	9.5671	0.075
3	789	3	209.423	9.492	0.075
3	791	3	209.977	9.397	0.075
3	793	3	210.512	9.3231	0.075
3	794	3	210.784	9.2891	0.075
3	795	3	211.053	9.2508	0.075
3	796	3	211.327	9.2048	0.075
3	797	3	211.582	9.1588	0.075
3	799	3	212.119	9.0847	0.075
3	801	3	212.653	8.9945	0.075
3	802	3	212.897	8.9663	0.075
3	803	3	213.164	8.9353	0.075
3	805	3	213.68	8.8285	0.075
3	809	3	214.73	8.6903	0.075
3	810	3	214.993	8.6597	0.075
3	811	3	215.259	8.6335	0.075
3	812	3	215.525	8.6167	0.075
3	813	3	215.809	8.5812	0.075
3	814	3	216.08	8.5426	0.075
3	816	3	216.605	8.477	0.075
3	817	3	216.887	8.4394	0.075
3	821	3	217.907	8.2211	0.075
3	822	3	218.186	8.1655	0.075
3	823	3	218.467	8.108	0.075
3	824	3	218.728	8.0595	0.075
3	825	3	218.993	8.0104	0.075
3	826	3	219.255	7.9617	0.075
3	827	3	219.524	7.9185	0.075
3	828	3	219.786	7.8746	0.075
3	829	3	220.033	7.8198	0.075
3	830	3	220.308	7.7679	0.075
3	831	3	220.56	7.7205	0.075
3	832	3	220.806	7.6627	0.075
3	833	3	221.062	7.6115	0.075
3	834	3	221.321	7.5648	0.075
3	835	3	221.563	7.517	0.075
3	836	3	221.818	7.49	0.075
3	837	3	222.069	7.4506	0.075
3	839	3	222.633	7.3801	0.075
3	841	3	223.216	7.2913	0.075
3	842	3	223.445	7.2694	0.075
3	843	3	223.693	7.2221	0.075
3	844	3	223.974	7.1599	0.075
3	846	3	224.502	7.0716	0.075
3	848	3	224.946	6.9635	0.075
3	849	3	225.246	6.8957	0.075
3	852	3	225.936	6.7573	0.075
3	854	3	226.575	6.6838	0.075
3	863	3	229.032	6.25	0.075
3	864	3	229.284	6.1961	0.075
3	865	3	229.546	6.1395	0.075
3	866	3	229.805	6.0832	0.075
3	867	3	230.073	6.0386	0.075
3	868	3	230.328	5.9812	0.075
3	869	3	230.588	5.9327	0.075
3	871	3	231.097	5.8165	0.075
3	872	3	231.376	5.7657	0.075
3	873	3	231.635	5.7206	0.075
3	874	3	231.922	5.639	0.075
3	875	3	232.238	5.5786	0.075
3	877	3	232.742	5.4971	0.075
3	878	3	233.002	5.4597	0.075
3	880	3	233.525	5.3759	0.075
3	881	3	233.793	5.3129	0.075
3	882	3	234.045	5.247	0.075
3	883	3	234.31	5.2102	0.075
3	884	3	234.568	5.1534	0.075
3	885	3	234.827	5.1075	0.075
3	886	3	235.079	5.0403	0.075
3	887	3	235.332	4.9891	0.075
3	888	3	235.579	4.925	0.075
3	889	3	235.843	4.8662	0.075
3	890	3	236.112	4.8191	0.075
3	891	3	236.387	4.7785	0.075
3	892	3	236.661	4.7283	0.075
3	893	3	236.911	4.6799	0.075
3	895	3	237.443	4.5765	0.075
3	896	3	237.698	4.5286	0.075
3	897	3	237.956	4.4804	0.075
3	898	3	238.213	4.4231	0.075
3	899	3	238.485	4.3694	0.075
3	900	3	238.758	4.3169	0.075
3	901	3	239.008	4.2635	0.075
3	903	3	239.542	4.1795	0.075
3	904	3	239.795	4.1344	0.075
3	905	3	240.054	4.0811	0.075
3	906	3	240.315	4.0239	0.075
3	907	3	240.59	3.9822	0.075
3	908	3	240.855	3.9417	0.075
3	909	3	241.124	3.9019	0.075
3	910	3	241.39	3.8478	0.075
3	911	3	241.66	3.8054	0.075
3	912	3	241.919	3.7645	0.075
3	913	3	242.188	3.7161	0.075
3	914	3	242.441	3.6734	0.075
3	916	3	242.98	3.595	0.075
3	917	3	243.246	3.5457	0.075
3	918	3	243.509	3.4957	0.075
3	920	3	244.052	3.4155	0.075
3	921	3	244.322	3.3682	0.075
3	922	3	244.576	3.3291	0.075
3	923	3	244.842	3.2811	0.075
3	924	3	245.386	3.1824	0.075
3	925	3	245.656	3.1357	0.075
3	927	3	246.201	3.0504	0.075
3	928	3	246.459	2.9936	0.075
3	929	3	246.731	2.9424	0.075
3	931	3	247.239	2.8654	0.075
3	932	3	247.497	2.8134	0.075
3	933	3	247.75	2.7683	0.075
3	934	3	247.994	2.7255	0.075
3	935	3	248.237	2.6693	0.075
3	939	3	249.243	2.5165	0.075
3	940	3	249.554	2.4506	0.075
3	942	3	250.147	2.3396	0.075
3	943	3	250.413	2.2953	0.075
3	944	3	250.707	2.2512	0.075
3	949	3	251.905	2.0658	0.075
3	950	3	252.145	2.0211	0.075
3	951	3	252.481	1.9545	0.075
3	952	3	252.687	1.9226	0.075
3	953	3	252.96	1.8836	0.075
3	955	3	253.459	1.8163	0.075
3	956	3	253.709	1.7654	0.075
3	957	3	254.018	1.7218	0.075
3	958	3	254.31	1.6669	0.075
3	959	3	254.574	1.629	0.075
3	960	3	254.714	1.5967	0.075
3	961	3	254.678	1.5914	0.075
3	962	3	254.696	1.5904	0.075
3	963	3	254.866	1.5667	0.075
3	964	3	255.021	1.5411	0.075
3	965	3	255.111	1.5237	0.075
3	966	3	255.1	1.5239	0.075
3	967	3	254.812	1.5746	0.075
3	969	3	254.537	1.6164	0.075
3	970	3	254.493	1.6145	0.075
3	972	3	254.996	1.548	0.075
3	973	3	255.148	1.5142	0.075
3	974	3	255.31	1.4878	0.075
3	975	3	255.678	1.4344	0.075
3	977	3	256.043	1.3778	0.075
3	979	3	256.11	1.3473	0.075
3	980	3	256.203	1.3369	0.075
3	981	3	256.291	1.3259	0.075
3	6	3	1.3056	41.3817	0.075
3	8	3	1.8576	41.3053	0.075
3	9	3	2.1216	41.2723	0.075
3	10	3	2.3726	41.241	0.075
3	11	3	2.6276	41.1942	0.075
3	13	3	3.1726	41.1113	0.075
3	15	3	3.6946	41.0089	0.075
3	17	3	4.2306	40.9494	0.075
3	19	3	4.7486	40.8698	0.075
3	20	3	5.0076	40.8226	0.075
3	21	3	5.2906	40.7872	0.075
3	24	3	6.0776	40.585	0.075
3	27	3	6.8706	40.4784	0.075
3	29	3	7.3156	40.408	0.075
3	31	3	7.7426	40.3546	0.075
3	33	3	8.3676	40.2542	0.075
3	44	3	11.3176	39.7445	0.075
3	48	3	12.4016	39.6238	0.075
3	51	3	13.1346	39.5248	0.075
3	53	3	13.7376	39.4198	0.075
3	55	3	14.2926	39.343	0.075
3	58	3	15.0276	39.2288	0.075
3	61	3	15.8446	39.1193	0.075
3	64	3	16.6376	38.9979	0.075
3	66	3	17.1176	38.9231	0.075
3	160	3	42.2216	35.5407	0.075
3	161	3	42.4906	35.4997	0.075
3	162	3	42.7576	35.4477	0.075
3	163	3	43.0176	35.4115	0.075
3	164	3	43.2906	35.3774	0.075
3	165	3	43.5546	35.3481	0.075
3	166	3	43.8206	35.3149	0.075
3	168	3	44.3586	35.2439	0.075
3	172	3	45.4086	35.0756	0.075
3	173	3	45.6846	35.0151	0.075
3	174	3	45.9366	34.9799	0.075
3	176	3	46.4716	34.8722	0.075
3	177	3	46.7556	34.8441	0.075
3	178	3	47.0356	34.8017	0.075
3	179	3	47.2696	34.7762	0.075
3	181	3	47.7846	34.6636	0.075
3	183	3	48.3206	34.6003	0.075
3	185	3	48.8256	34.5335	0.075
3	187	3	49.3626	34.4478	0.075
3	189	3	49.8976	34.3698	0.075
3	194	3	51.2196	34.16	0.075
3	195	3	51.4956	34.1181	0.075
3	199	3	52.5406	33.9727	0.075
3	201	3	53.0786	33.8869	0.075
3	203	3	53.5936	33.8077	0.075
3	205	3	54.1136	33.7427	0.075
3	206	3	54.3966	33.7036	0.075
3	207	3	54.6466	33.6562	0.075
3	208	3	54.9266	33.6141	0.075
3	210	3	55.4416	33.5354	0.075
3	211	3	55.7166	33.4868	0.075
3	212	3	55.9746	33.426	0.075
3	214	3	56.4986	33.3462	0.075
3	215	3	56.7636	33.3274	0.075
3	217	3	57.3056	33.2596	0.075
3	218	3	57.5826	33.2179	0.075
3	219	3	57.8546	33.1767	0.075
3	220	3	58.0876	33.1405	0.075
3	223	3	58.8886	32.9904	0.075
3	224	3	59.1536	32.943	0.075
3	230	3	60.7046	32.733	0.075
3	231	3	61.0096	32.6842	0.075
3	232	3	61.2176	32.6546	0.075
3	234	3	61.8426	32.5586	0.075
3	236	3	62.3536	32.4841	0.075
3	238	3	62.8626	32.4062	0.075
3	239	3	63.1466	32.3528	0.075
3	241	3	63.6376	32.2701	0.075
3	243	3	63.8936	32.2167	0.075
3	245	3	64.7346	32.1008	0.075
3	247	3	65.2226	32.0398	0.075
3	249	3	65.7486	31.9598	0.075
3	250	3	65.9996	31.9284	0.075
3	251	3	66.2696	31.8876	0.075
3	252	3	66.5536	31.8414	0.075
3	253	3	66.8136	31.816	0.075
3	254	3	67.0726	31.7836	0.075
3	258	3	68.1086	31.5971	0.075
3	260	3	68.6736	31.5157	0.075
3	261	3	68.9176	31.4567	0.075
3	263	3	69.4366	31.3883	0.075
3	264	3	69.7136	31.3501	0.075
3	265	3	69.9836	31.3163	0.075
3	268	3	70.7596	31.2158	0.075
3	271	3	71.5536	31.1129	0.075
3	272	3	71.8026	31.0854	0.075
3	274	3	72.3466	31.0138	0.075
3	275	3	72.6136	30.9769	0.075
3	277	3	73.1336	30.8976	0.075
3	286	3	75.4936	30.5063	0.075
3	287	3	75.7616	30.48	0.075
3	288	3	76.0246	30.4435	0.075
3	292	3	77.1066	30.3154	0.075
3	293	3	77.3556	30.2771	0.075
3	294	3	77.5926	30.2404	0.075
3	295	3	77.8806	30.2008	0.075
3	296	3	78.1486	30.1637	0.075
3	315	3	83.1706	29.4326	0.075
3	316	3	83.4406	29.381	0.075
3	317	3	83.6886	29.3322	0.075
3	318	3	83.9636	29.2942	0.075
3	324	3	85.5696	29.0756	0.075
3	325	3	85.8756	29.0196	0.075
3	326	3	86.0626	28.9498	0.075
3	329	3	86.8656	28.8102	0.075
3	331	3	87.3996	28.7399	0.075
3	332	3	87.6376	28.7021	0.075
3	334	3	87.9066	28.6652	0.075
3	336	3	88.6736	28.5399	0.075
3	361	3	95.3246	27.4256	0.075
3	363	3	95.8666	27.3437	0.075
3	365	3	96.4176	27.2842	0.075
3	367	3	96.9166	27.2031	0.075
3	369	3	97.4596	27.1165	0.075
3	370	3	97.7176	27.0654	0.075
3	374	3	98.7706	26.9432	0.075
3	376	3	99.3196	26.8605	0.075
3	379	3	100.094	26.7403	0.075
3	380	3	100.34	26.6673	0.075
3	384	3	101.381	26.5231	0.075
3	386	3	101.932	26.4542	0.075
3	387	3	102.202	26.4111	0.075
3	388	3	102.458	26.3744	0.075
3	389	3	102.704	26.3202	0.075
3	391	3	103.251	26.2565	0.075
3	398	3	105.027	25.9876	0.075
3	401	3	105.862	25.8597	0.075
3	402	3	106.117	25.8138	0.075
3	404	3	106.66	25.7506	0.075
3	406	3	107.235	25.682	0.075
3	408	3	107.757	25.605	0.075
3	409	3	108.025	25.5598	0.075
3	410	3	108.301	25.5159	0.075
3	411	3	108.58	25.4669	0.075
3	412	3	108.812	25.4309	0.075
3	413	3	109.108	25.3868	0.075
3	414	3	109.329	25.3545	0.075
3	415	3	109.602	25.311	0.075
3	416	3	109.874	25.2536	0.075
3	418	3	110.426	25.1705	0.075
3	419	3	110.66	25.1442	0.075
3	420	3	110.942	25.0943	0.075
3	421	3	111.203	25.0663	0.075
3	422	3	111.478	25.0319	0.075
3	423	3	111.741	24.9997	0.075
3	425	3	112.235	24.9373	0.075
3	427	3	112.761	24.8153	0.075
3	432	3	114.069	24.6002	0.075
3	433	3	114.333	24.5648	0.075
3	434	3	114.592	24.5635	0.075
3	435	3	114.871	24.521	0.075
3	436	3	115.137	24.4954	0.075
3	438	3	115.643	24.4222	0.075
3	440	3	116.17	24.3422	0.075
3	441	3	116.447	24.2959	0.075
3	442	3	116.701	24.2618	0.075
3	443	3	116.953	24.235	0.075
3	444	3	117.214	24.1842	0.075
3	445	3	117.479	24.1352	0.075
3	446	3	117.756	24.0882	0.075
3	448	3	118.275	23.9923	0.075
3	450	3	118.812	23.9111	0.075
3	456	3	120.375	23.6266	0.075
3	457	3	120.647	23.5761	0.075
3	460	3	121.996	23.4269	0.075
3	461	3	122.244	23.3677	0.075
3	464	3	123	23.2685	0.075
3	465	3	123.537	23.1996	0.075
3	466	3	123.818	23.1616	0.075
3	467	3	124.079	23.1131	0.075
3	468	3	124.348	23.0842	0.075
3	469	3	124.625	23.0449	0.075
3	471	3	125.139	22.9877	0.075
3	472	3	125.379	22.9436	0.075
3	473	3	125.777	22.8845	0.075
3	474	3	125.944	22.8565	0.075
3	475	3	126.21	22.8209	0.075
3	476	3	126.504	22.7772	0.075
3	477	3	126.733	22.7509	0.075
3	479	3	127.317	22.6615	0.075
3	480	3	127.572	22.6202	0.075
3	481	3	127.804	22.5842	0.075
3	482	3	128.064	22.5423	0.075
3	483	3	128.367	22.4833	0.075
3	484	3	128.626	22.4439	0.075
3	485	3	128.9	22.3996	0.075
3	486	3	129.139	22.3469	0.075
3	487	3	129.422	22.3045	0.075
3	488	3	129.705	22.2597	0.075
3	489	3	129.958	22.2231	0.075
3	490	3	130.232	22.1722	0.075
3	491	3	130.5	22.1152	0.075
3	492	3	130.775	22.0808	0.075
3	493	3	130.998	22.0556	0.075
3	494	3	131.245	22.0174	0.075
3	495	3	131.528	21.9799	0.075
3	496	3	131.785	21.9264	0.075
3	497	3	132.044	21.8917	0.075
3	498	3	132.327	21.8282	0.075
3	500	3	132.85	21.7534	0.075
3	501	3	133.107	21.7142	0.075
3	504	3	133.913	21.6088	0.075
3	505	3	134.167	21.5841	0.075
3	506	3	134.439	21.5431	0.075
3	507	3	134.685	21.5146	0.075
3	508	3	134.952	21.4813	0.075
3	510	3	135.474	21.4137	0.075
3	511	3	135.738	21.3854	0.075
3	512	3	136.013	21.3416	0.075
3	533	3	141.566	20.495	0.075
3	534	3	141.81	20.4695	0.075
3	535	3	142.097	20.4134	0.075
3	536	3	142.359	20.3489	0.075
3	537	3	142.635	20.325	0.075
3	539	3	143.144	20.2637	0.075
3	540	3	143.43	20.2341	0.075
3	542	3	143.951	20.1596	0.075
3	543	3	144.23	20.0975	0.075
3	544	3	144.478	20.0562	0.075
3	545	3	144.738	20.0237	0.075
3	549	3	145.794	19.7917	0.075
3	551	3	146.328	19.7085	0.075
3	553	3	146.786	19.6413	0.075
3	554	3	147.1	19.588	0.075
3	556	3	147.628	19.5196	0.075
3	558	3	148.161	19.4178	0.075
3	560	3	148.669	19.3098	0.075
3	562	3	149.197	19.2109	0.075
3	564	3	149.703	19.143	0.075
3	566	3	150.314	19.0619	0.075
3	567	3	150.461	19.0318	0.075
3	569	3	151.093	18.9434	0.075
3	570	3	151.348	18.8998	0.075
3	572	3	151.889	18.8345	0.075
3	573	3	152.149	18.8091	0.075
3	575	3	152.675	18.7433	0.075
3	577	3	153.182	18.6729	0.075
3	578	3	153.44	18.6172	0.075
3	579	3	153.734	18.557	0.075
3	580	3	153.97	18.5134	0.075
3	581	3	154.233	18.4805	0.075
3	583	3	154.757	18.3766	0.075
3	584	3	155.021	18.3202	0.075
3	586	3	155.548	18.2739	0.075
3	587	3	155.812	18.2268	0.075
3	588	3	156.077	18.1984	0.075
3	589	3	156.345	18.1602	0.075
3	590	3	156.618	18.1284	0.075
3	591	3	156.889	18.0641	0.075
3	592	3	157.136	18.0262	0.075
3	593	3	157.403	17.9881	0.075
3	596	3	158.217	17.877	0.075
3	599	3	159.007	17.7665	0.075
3	603	3	160.063	17.5852	0.075
3	605	3	160.637	17.4548	0.075
3	986	3	262.85	0.9566	0.075
3	987	3	263.166	1.0092	0.075
3	989	3	263.786	1.0965	0.075
3	990	3	264.102	1.1491	0.075
3	992	3	264.773	1.2461	0.075
3	993	3	265.148	1.3191	0.075
3	994	3	265.514	1.3845	0.075
3	996	3	266.069	1.4703	0.075
3	998	3	266.266	1.5047	0.075
3	999	3	266.176	1.4902	0.075
3	1001	3	266.569	1.5426	0.075
3	1003	3	267.015	1.6082	0.075
3	1005	3	267.303	1.6671	0.075
3	1007	3	267.43	1.6928	0.075
3	1009	3	267.915	1.7796	0.075
3	1011	3	268.424	1.8498	0.075
3	1013	3	268.968	1.9407	0.075
3	1015	3	269.489	2.0353	0.075
3	1022	3	271.347	2.356	0.075
3	1023	3	271.604	2.4012	0.075
3	1017	3	270.033	2.1295	0.075
3	1019	3	270.546	2.2166	0.075
3	1025	3	272.131	2.4736	0.075
3	1026	3	272.406	2.5113	0.075
3	1028	3	272.919	2.5787	0.075
3	1030	3	273.445	2.6575	0.075
3	1031	3	273.705	2.7097	0.075
3	1033	3	274.238	2.7959	0.075
3	1034	3	274.502	2.842	0.075
3	1036	3	275.044	2.9262	0.075
3	1037	3	275.3	2.9713	0.075
3	1038	3	275.563	3.0172	0.075
3	1039	3	275.804	3.0539	0.075
3	1041	3	276.354	3.1259	0.075
3	1042	3	276.629	3.1701	0.075
3	1044	3	277.15	3.2516	0.075
3	1045	3	277.414	3.3108	0.075
3	1046	3	277.676	3.3599	0.075
3	1048	3	278.21	3.4398	0.075
3	1049	3	278.477	3.4928	0.075
3	1050	3	278.75	3.5335	0.075
3	1051	3	278.993	3.5639	0.075
3	1059	3	281.123	3.8596	0.075
3	1061	3	281.697	3.9608	0.075
3	1062	3	282.003	4.0154	0.075
3	1069	3	283.928	4.3573	0.075
3	1068	3	283.642	4.2951	0.075
3	1064	3	282.565	4.1058	0.075
3	1065	3	282.8	4.1475	0.075
3	1066	3	283.088	4.1977	0.075
3	1056	3	280.341	3.7361	0.075
3	1053	3	279.524	3.6323	0.075
3	1070	3	284.191	4.3972	0.075
3	1071	3	284.476	4.4487	0.075
3	1072	3	284.747	4.4826	0.075
3	1073	3	285.041	4.5211	0.075
3	1074	3	285.336	4.558	0.075
3	1075	3	285.652	4.6046	0.075
3	1076	3	285.921	4.6417	0.075
3	1077	3	286.174	4.6874	0.075
3	1078	3	286.442	4.7386	0.075
3	1079	3	286.687	4.7815	0.075
3	1080	3	286.947	4.8211	0.075
3	1081	3	287.094	4.8483	0.075
3	1082	3	287.323	4.884	0.075
3	1083	3	287.572	4.9239	0.075
3	1084	3	287.81	4.9589	0.075
3	1085	3	288.044	4.9935	0.075
3	1086	3	288.303	5.0259	0.075
3	1087	3	288.542	5.0681	0.075
3	1088	3	288.816	5.12	0.075
3	1089	3	289.072	5.1625	0.075
3	1090	3	289.324	5.2046	0.075
3	1091	3	289.584	5.253	0.075
3	1092	3	289.843	5.2977	0.075
3	1093	3	290.107	5.3448	0.075
3	1094	3	290.367	5.3861	0.075
3	1095	3	290.646	5.4298	0.075
3	1096	3	290.907	5.4748	0.075
3	1097	3	291.172	5.5185	0.075
3	1098	3	291.439	5.5624	0.075
3	1099	3	291.703	5.599	0.075
3	1100	3	291.991	5.6438	0.075
3	1102	3	292.523	5.7347	0.075
3	1104	3	293.047	5.8161	0.075
3	1105	3	293.313	5.8546	0.075
3	1106	3	293.575	5.8891	0.075
3	1107	3	293.841	5.9294	0.075
3	1108	3	294.099	5.9705	0.075
3	1109	3	294.358	6.0223	0.075
3	1110	3	294.614	6.0613	0.075
3	1111	3	294.871	6.1058	0.075
3	1113	3	295.453	6.1785	0.075
3	1114	3	295.659	6.2113	0.075
3	1117	3	296.445	6.3343	0.075
3	1118	3	296.708	6.3777	0.075
3	1119	3	297.005	6.4343	0.075
3	1123	3	298.06	6.6102	0.075
3	1124	3	298.214	6.633	0.075
3	1125	3	298.571	6.6794	0.075
3	1126	3	298.834	6.7211	0.075
3	1127	3	299.09	6.7654	0.075
3	1128	3	299.354	6.809	0.075
3	1129	3	299.621	6.8512	0.075
3	1130	3	299.888	6.911	0.075
3	1131	3	300.152	6.9687	0.075
3	1132	3	300.419	6.9985	0.075
3	1133	3	300.688	7.0375	0.075
3	1134	3	300.951	7.0827	0.075
3	1135	3	301.209	7.1202	0.075
3	1136	3	301.477	7.1625	0.075
3	1137	3	301.734	7.1999	0.075
3	1138	3	302.013	7.2419	0.075
3	1139	3	302.281	7.2807	0.075
3	1140	3	302.551	7.3179	0.075
3	1142	3	303.074	7.4025	0.075
3	1143	3	303.332	7.4506	0.075
3	1144	3	303.602	7.4879	0.075
3	1145	3	303.876	7.5362	0.075
3	1146	3	304.142	7.5853	0.075
3	1147	3	304.66	7.6642	0.075
3	1148	3	304.918	7.7052	0.075
3	1149	3	305.203	7.7515	0.075
3	1150	3	305.458	7.7939	0.075
3	1151	3	305.732	7.837	0.075
3	1152	3	305.915	7.8775	0.075
3	1153	3	306.229	7.9361	0.075
3	1154	3	306.532	7.9828	0.075
3	1155	3	306.758	8.0287	0.075
3	1156	3	307.033	8.0754	0.075
3	1157	3	307.286	8.1159	0.075
3	1158	3	307.564	8.1524	0.075
3	1159	3	307.751	8.1846	0.075
3	1160	3	308.092	8.2289	0.075
3	1161	3	308.366	8.2773	0.075
3	1162	3	308.489	8.2997	0.075
3	1165	3	309.442	8.44	0.075
3	1166	3	309.706	8.4801	0.075
3	1167	3	309.961	8.5208	0.075
3	1168	3	310.229	8.5684	0.075
3	1169	3	310.485	8.5951	0.075
3	1170	3	310.753	8.6374	0.075
3	1171	3	311.001	8.6825	0.075
3	1172	3	311.268	8.7159	0.075
3	1173	3	311.531	8.747	0.075
3	1175	3	312.054	8.8212	0.075
3	1176	3	312.314	8.8713	0.075
3	1177	3	312.58	8.9169	0.075
3	1178	3	312.84	8.9582	0.075
3	1179	3	313.115	8.9908	0.075
3	1180	3	313.381	9.0294	0.075
3	1182	3	313.919	9.1136	0.075
3	1183	3	314.188	9.1634	0.075
3	1184	3	314.434	9.2042	0.075
3	1185	3	314.743	9.2569	0.075
3	1186	3	314.975	9.3182	0.075
3	1187	3	315.234	9.3626	0.075
3	1188	3	315.523	9.4048	0.075
3	1189	3	315.792	9.4545	0.075
3	1191	3	316.32	9.5367	0.075
3	1192	3	316.525	9.5724	0.075
3	302	-4	79.7306	29.9923	0.1
3	304	-4	80.2836	29.9173	0.1
3	306	-4	80.8016	29.8378	0.1
3	308	-4	81.3306	29.7717	0.1
3	310	-4	81.8536	29.6946	0.1
3	311	-4	82.0966	29.6642	0.1
3	314	-4	82.9016	29.543	0.1
3	316	-4	83.4406	29.4638	0.1
3	317	-4	83.6886	29.4211	0.1
3	318	-4	83.9636	29.3749	0.1
3	320	-4	84.5146	29.2972	0.1
3	325	-4	85.8756	29.0683	0.1
3	329	-4	86.8656	28.8445	0.1
3	331	-4	87.3996	28.7572	0.1
3	333	-4	87.9846	28.6694	0.1
3	335	-4	88.4386	28.592	0.1
3	338	-4	89.2436	28.4591	0.1
3	349	-4	92.1156	28.0148	0.1
3	350	-4	92.4146	27.9892	0.1
3	351	-4	92.6786	27.9694	0.1
3	353	-4	93.2026	27.8848	0.1
3	354	-4	93.4766	27.8461	0.1
3	356	-4	93.9876	27.7881	0.1
3	359	-4	94.7806	27.6905	0.1
3	361	-4	95.3246	27.6225	0.1
3	363	-4	95.8666	27.5474	0.1
3	364	-4	96.1356	27.5093	0.1
3	366	-4	96.6676	27.4428	0.1
3	368	-4	97.1866	27.3691	0.1
3	370	-4	97.7176	27.2983	0.1
3	371	-4	97.9616	27.2664	0.1
3	373	-4	98.4826	27.1983	0.1
3	375	-4	99.0626	27.1111	0.1
3	378	-4	99.8196	27.0018	0.1
3	380	-4	100.34	26.9368	0.1
3	382	-4	100.82	26.8768	0.1
3	383	-4	101.106	26.8454	0.1
3	385	-4	101.659	26.7631	0.1
3	386	-4	101.932	26.7289	0.1
3	388	-4	102.458	26.6632	0.1
3	390	-4	102.957	26.5979	0.1
3	392	-4	103.459	26.5263	0.1
3	394	-4	104.009	26.4428	0.1
3	396	-4	104.52	26.3731	0.1
3	398	-4	105.027	26.3009	0.1
3	400	-4	105.573	26.2503	0.1
3	403	-4	106.374	26.1737	0.1
3	408	-4	107.757	26.0067	0.1
3	409	-4	108.025	25.9614	0.1
3	411	-4	108.58	25.8832	0.1
3	414	-4	109.329	25.7661	0.1
3	416	-4	109.874	25.698	0.1
3	417	-4	110.141	25.6587	0.1
3	420	-4	110.942	25.5556	0.1
3	422	-4	111.478	25.4857	0.1
3	424	-4	111.998	25.4207	0.1
3	426	-4	112.511	25.3595	0.1
3	428	-4	113.001	25.31	0.1
3	430	-4	113.533	25.2494	0.1
3	431	-4	113.795	25.2255	0.1
3	433	-4	114.333	25.1729	0.1
3	435	-4	114.871	25.1204	0.1
3	437	-4	115.398	25.0869	0.1
3	439	-4	115.943	25.0305	0.1
3	441	-4	116.447	24.9822	0.1
3	443	-4	116.953	24.9425	0.1
3	445	-4	117.479	24.8885	0.1
3	447	-4	118.001	24.8144	0.1
3	451	-4	119.064	24.7816	0.1
3	505	-4	134.167	22.9752	0.1
3	507	-4	134.685	22.9147	0.1
3	508	-4	134.952	22.8899	0.1
3	512	-4	136.013	22.8001	0.1
3	510	-4	135.474	22.8375	0.1
3	515	-4	136.79	22.7159	0.1
3	517	-4	137.336	22.6476	0.1
3	519	-4	137.836	22.5894	0.1
3	521	-4	138.415	22.5213	0.1
3	523	-4	138.92	22.4582	0.1
3	534	-4	141.81	22.0927	0.1
3	536	-4	142.359	22.0283	0.1
3	543	-4	144.23	21.7859	0.1
3	546	-4	144.99	21.7123	0.1
3	538	-4	142.872	21.9639	0.1
3	540	-4	143.43	21.8861	0.1
3	556	-4	147.628	21.438	0.1
3	559	-4	148.488	21.3406	0.1
3	561	-4	148.956	21.2801	0.1
3	563	-4	149.497	21.2124	0.1
3	1	4	0.0006	39.2332	0.1
3	2	4	0.2536	39.2201	0.1
3	3	4	0.5256	39.1824	0.1
3	4	4	0.7936	39.1489	0.1
3	5	4	1.0426	39.1141	0.1
3	6	4	1.3056	39.0812	0.1
3	7	4	1.5766	39.0473	0.1
3	8	4	1.8576	39.0157	0.1
3	9	4	2.1216	38.9939	0.1
3	10	4	2.3726	38.9514	0.1
3	11	4	2.6276	38.9417	0.1
3	12	4	2.9186	38.9165	0.1
3	13	4	3.1726	38.8773	0.1
3	14	4	3.4436	38.8435	0.1
3	15	4	3.6946	38.8121	0.1
3	16	4	3.9256	38.8092	0.1
3	17	4	4.2306	38.7599	0.1
3	18	4	4.4736	38.7295	0.1
3	19	4	4.7486	38.684	0.1
3	20	4	5.0076	38.6554	0.1
3	21	4	5.2906	38.6126	0.1
3	22	4	5.5286	38.6051	0.1
3	23	4	5.8056	38.578	0.1
3	24	4	6.0776	38.544	0.1
3	25	4	6.4816	38.5009	0.1
3	26	4	6.6246	38.4868	0.1
3	27	4	6.8706	38.456	0.1
3	28	4	7.1216	38.4246	0.1
3	29	4	7.3156	38.4041	0.1
3	30	4	7.5136	38.3756	0.1
3	33	4	8.3676	38.2763	0.1
3	34	4	8.7196	38.236	0.1
3	36	4	9.2306	38.1907	0.1
3	37	4	9.5006	38.1607	0.1
3	38	4	9.7826	38.1254	0.1
3	39	4	10.0496	38.0846	0.1
3	41	4	10.5436	38.034	0.1
3	43	4	11.0556	37.9921	0.1
3	44	4	11.3176	37.9631	0.1
3	46	4	11.8896	37.9101	0.1
3	49	4	12.6596	37.825	0.1
3	50	4	12.9416	37.7897	0.1
3	52	4	13.4426	37.7531	0.1
3	53	4	13.7376	37.7347	0.1
3	55	4	14.2926	37.6897	0.1
3	57	4	14.7916	37.6185	0.1
3	60	4	15.6196	37.5209	0.1
3	62	4	16.1016	37.4783	0.1
3	65	4	16.8996	37.3418	0.1
3	67	4	17.4346	37.2808	0.1
3	69	4	17.9536	37.21	0.1
3	72	4	18.7666	37.1025	0.1
3	191	4	50.4456	33.2073	0.1
3	193	4	50.9706	33.1417	0.1
3	196	4	51.7646	33.0366	0.1
3	198	4	52.3176	32.9439	0.1
3	200	4	52.8206	32.8634	0.1
3	203	4	53.5936	32.7727	0.1
3	204	4	53.8596	32.7512	0.1
3	207	4	54.6466	32.6587	0.1
3	210	4	55.4416	32.5711	0.1
3	212	4	55.9746	32.503	0.1
3	214	4	56.4986	32.4331	0.1
3	221	4	58.3746	32.1692	0.1
3	222	4	58.6366	32.1408	0.1
3	224	4	59.1536	32.0894	0.1
3	226	4	59.6986	32.0389	0.1
3	229	4	60.5156	31.9309	0.1
3	232	4	61.2176	31.8255	0.1
3	244	4	64.5436	31.3569	0.1
3	249	4	65.7486	31.2224	0.1
3	251	4	66.2696	31.1543	0.1
3	253	4	66.8136	31.0863	0.1
3	255	4	67.3336	31.0155	0.1
3	256	4	67.5906	30.9686	0.1
3	258	4	68.1086	30.9009	0.1
3	261	4	68.9176	30.7851	0.1
3	264	4	69.7136	30.6856	0.1
3	282	4	74.4406	30.1271	0.1
3	284	4	74.9876	30.0646	0.1
3	286	4	75.4936	30.0102	0.1
3	289	4	76.3486	29.8886	0.1
3	290	4	76.5656	29.8438	0.1
3	291	4	76.8226	29.797	0.1
3	292	4	77.1066	29.7497	0.1
3	293	4	77.3556	29.7127	0.1
3	294	4	77.5926	29.6831	0.1
3	309	4	81.5886	29.2101	0.1
3	311	4	82.0966	29.1613	0.1
3	312	4	82.3666	29.1275	0.1
3	314	4	82.9016	29.0518	0.1
3	317	4	83.6886	28.9534	0.1
3	319	4	84.2236	28.8836	0.1
3	321	4	84.7626	28.8133	0.1
3	322	4	85.0076	28.7827	0.1
3	323	4	85.2816	28.7484	0.1
3	325	4	85.8756	28.6712	0.1
3	327	4	86.3316	28.6201	0.1
4	858	2	227.709	3.3146	0.05
4	859	2	227.968	3.2593	0.05
4	860	2	228.242	3.1858	0.05
4	861	2	228.478	3.1268	0.05
4	862	2	228.715	3.0677	0.05
4	863	2	228.955	3.0148	0.05
4	864	2	229.178	2.9705	0.05
4	865	2	229.417	2.9243	0.05
4	866	2	229.656	2.8617	0.05
4	867	2	229.898	2.8118	0.05
4	868	2	230.121	2.7643	0.05
4	869	2	230.343	2.7169	0.05
4	870	2	230.546	2.6751	0.05
4	871	2	230.758	2.6322	0.05
4	872	2	231.006	2.575	0.05
4	873	2	231.327	2.5185	0.05
4	874	2	231.671	2.4559	0.05
4	875	2	232.058	2.3879	0.05
4	876	2	232.325	2.3316	0.05
4	877	2	232.714	2.2731	0.05
4	878	2	233.001	2.2176	0.05
4	879	2	233.246	2.1706	0.05
4	880	2	233.475	2.1223	0.05
4	881	2	233.703	2.0676	0.05
4	882	2	233.909	2.0321	0.05
4	883	2	234.115	1.9834	0.05
4	884	2	234.301	1.9503	0.05
4	885	2	234.477	1.9054	0.05
4	886	2	234.628	1.8669	0.05
4	887	2	234.767	1.8397	0.05
4	888	2	234.875	1.8196	0.05
4	889	2	235.034	1.7736	0.05
4	890	2	235.348	1.7245	0.05
4	891	2	235.68	1.6666	0.05
4	892	2	235.98	1.6029	0.05
4	893	2	236.196	1.5563	0.05
4	894	2	236.398	1.5146	0.05
4	895	2	236.552	1.4823	0.05
4	896	2	236.673	1.4672	0.05
4	897	2	236.774	1.448	0.05
4	898	2	236.86	1.4372	0.05
4	899	2	237.014	1.4147	0.05
4	856	2	227.184	3.4646	0.05
4	857	2	227.446	3.386	0.05
4	855	2	226.889	3.5244	0.05
4	854	2	226.595	3.607	0.05
4	188	3	49.641	31.2837	0.075
4	189	3	49.908	31.2377	0.075
4	191	3	50.456	31.1692	0.075
4	192	3	50.741	31.1399	0.075
4	193	3	50.978	31.0977	0.075
4	215	3	56.758	30.3563	0.075
4	218	3	57.575	30.2226	0.075
4	219	3	57.849	30.1884	0.075
4	222	3	58.635	30.1027	0.075
4	225	3	59.402	30.0069	0.075
4	241	3	63.636	29.3704	0.075
4	242	3	64.195	29.3069	0.075
4	243	3	63.897	29.3441	0.075
4	247	3	65.227	29.1369	0.075
4	249	3	65.751	29.0585	0.075
4	252	3	66.553	28.9454	0.075
4	254	3	67.07	28.8765	0.075
4	255	3	67.332	28.8523	0.075
4	257	3	67.869	28.7852	0.075
4	262	3	69.179	28.6171	0.075
4	263	3	69.433	28.5897	0.075
4	265	3	69.978	28.5259	0.075
4	266	3	70.229	28.5031	0.075
4	283	3	74.726	27.8894	0.075
4	284	3	74.989	27.8651	0.075
4	285	3	75.227	27.8354	0.075
4	286	3	75.496	27.7975	0.075
4	287	3	75.764	27.7511	0.075
4	288	3	76.026	27.7269	0.075
4	289	3	76.35	27.6864	0.075
4	290	3	76.566	27.6508	0.075
4	291	3	76.822	27.6188	0.075
4	292	3	77.107	27.566	0.075
4	293	3	77.355	27.5092	0.075
4	294	3	77.591	27.4797	0.075
4	295	3	77.879	27.4351	0.075
4	296	3	78.146	27.3889	0.075
4	297	3	78.412	27.3513	0.075
4	300	3	79.196	27.2548	0.075
4	302	3	79.722	27.1716	0.075
4	303	3	79.984	27.1185	0.075
4	304	3	80.275	27.0734	0.075
4	305	3	80.52	27.0399	0.075
4	306	3	80.792	26.9972	0.075
4	307	3	81.044	26.9627	0.075
4	308	3	81.321	26.9136	0.075
4	309	3	81.58	26.8667	0.075
4	310	3	81.846	26.8305	0.075
4	313	3	82.633	26.6944	0.075
4	314	3	82.895	26.6558	0.075
4	315	3	83.164	26.628	0.075
4	316	3	83.434	26.5943	0.075
4	317	3	83.682	26.5458	0.075
4	318	3	83.957	26.4998	0.075
4	319	3	84.216	26.4646	0.075
4	320	3	84.508	26.4019	0.075
4	321	3	84.756	26.3535	0.075
4	322	3	85.001	26.3112	0.075
4	324	3	85.564	26.2408	0.075
4	326	3	86.057	26.1969	0.075
4	329	3	86.862	26.0975	0.075
4	349	3	92.119	25.3166	0.075
4	350	3	92.419	25.2733	0.075
4	352	3	92.974	25.1836	0.075
4	353	3	93.205	25.1523	0.075
4	354	3	93.476	25.1034	0.075
4	368	3	97.187	24.5233	0.075
4	370	3	97.72	24.4567	0.075
4	371	3	97.962	24.4264	0.075
4	372	3	98.226	24.3794	0.075
4	373	3	98.478	24.3387	0.075
4	374	3	98.764	24.2942	0.075
4	376	3	99.313	24.2087	0.075
4	377	3	99.56	24.1744	0.075
4	378	3	99.808	24.1434	0.075
4	380	3	100.323	24.0761	0.075
4	381	3	100.573	24.0129	0.075
4	383	3	101.077	23.9533	0.075
4	384	3	101.352	23.9068	0.075
4	404	3	106.645	23.0876	0.075
4	406	3	107.226	23.0067	0.075
4	407	3	107.472	22.9609	0.075
4	409	3	108.023	22.8751	0.075
4	410	3	108.301	22.8166	0.075
4	411	3	108.58	22.7677	0.075
4	413	3	109.109	22.6924	0.075
4	415	3	109.603	22.6137	0.075
4	416	3	109.876	22.5791	0.075
4	418	3	110.43	22.49	0.075
4	425	3	112.25	22.2305	0.075
4	427	3	112.778	22.1442	0.075
4	431	3	113.813	21.9887	0.075
4	433	3	114.352	21.9126	0.075
4	434	3	114.611	21.893	0.075
4	435	3	114.89	21.8482	0.075
4	436	3	115.155	21.825	0.075
4	437	3	115.416	21.7895	0.075
4	440	3	116.189	21.7045	0.075
4	441	3	116.466	21.6582	0.075
4	443	3	116.972	21.5688	0.075
4	444	3	117.233	21.5275	0.075
4	447	3	118.016	21.3599	0.075
4	448	3	118.289	21.32	0.075
4	449	3	118.558	21.2805	0.075
4	451	3	119.079	21.1892	0.075
4	457	3	120.658	20.9454	0.075
4	458	3	120.909	20.9082	0.075
4	459	3	121.7	20.7875	0.075
4	460	3	122.006	20.7406	0.075
4	461	3	122.254	20.695	0.075
4	462	3	122.513	20.6481	0.075
4	463	3	122.773	20.6156	0.075
4	465	3	123.545	20.5075	0.075
4	466	3	123.825	20.458	0.075
4	467	3	124.087	20.4107	0.075
4	468	3	124.356	20.3684	0.075
4	469	3	124.633	20.3337	0.075
4	470	3	124.869	20.3042	0.075
4	471	3	125.147	20.2695	0.075
4	472	3	125.386	20.225	0.075
4	473	3	125.783	20.1609	0.075
4	474	3	125.951	20.1254	0.075
4	475	3	126.216	20.0777	0.075
4	476	3	126.51	20.0294	0.075
4	477	3	126.739	19.9862	0.075
4	478	3	126.98	19.9532	0.075
4	481	3	127.808	19.8177	0.075
4	487	3	129.424	19.5518	0.075
4	489	3	129.959	19.4657	0.075
4	490	3	130.233	19.4245	0.075
4	491	3	130.501	19.3881	0.075
4	492	3	130.776	19.3575	0.075
4	493	3	130.998	19.3173	0.075
4	495	3	131.528	19.2481	0.075
4	496	3	131.786	19.2043	0.075
4	497	3	132.045	19.1632	0.075
4	498	3	132.33	19.1275	0.075
4	499	3	132.582	19.096	0.075
4	500	3	132.854	19.0504	0.075
4	501	3	133.112	19.0153	0.075
4	502	3	133.385	18.9769	0.075
4	503	3	133.663	18.9348	0.075
4	504	3	133.921	18.9025	0.075
4	505	3	134.175	18.8708	0.075
4	506	3	134.449	18.8365	0.075
4	507	3	134.696	18.8027	0.075
4	508	3	134.964	18.7547	0.075
4	509	3	135.241	18.7172	0.075
4	510	3	135.488	18.6777	0.075
4	511	3	135.753	18.6299	0.075
4	512	3	136.027	18.5579	0.075
4	513	3	136.287	18.5225	0.075
4	514	3	136.536	18.4885	0.075
4	515	3	136.805	18.4548	0.075
4	516	3	137.076	18.4152	0.075
4	517	3	137.35	18.3809	0.075
4	520	3	138.143	18.2556	0.075
4	522	3	138.667	18.1843	0.075
4	524	3	139.193	18.1099	0.075
4	525	3	139.48	18.0624	0.075
4	526	3	139.727	18.0082	0.075
4	527	3	139.993	17.9605	0.075
4	528	3	140.256	17.9276	0.075
4	529	3	140.533	17.8726	0.075
4	531	3	141.06	17.769	0.075
4	532	3	141.308	17.7743	0.075
4	533	3	141.571	17.7182	0.075
4	534	3	141.815	17.6557	0.075
4	535	3	142.101	17.6142	0.075
4	537	3	142.639	17.4917	0.075
4	538	3	142.876	17.465	0.075
4	539	3	143.146	17.4138	0.075
4	540	3	143.431	17.3549	0.075
4	543	3	144.229	17.1883	0.075
4	545	3	144.739	17.1159	0.075
4	546	3	144.991	17.0553	0.075
4	547	3	145.282	17.0131	0.075
4	548	3	145.508	16.9587	0.075
4	565	3	150.023	16.23	0.075
4	567	3	150.457	16.1525	0.075
4	569	3	151.086	16.0893	0.075
4	571	3	151.61	16.0122	0.075
4	573	3	152.14	15.9421	0.075
4	575	3	152.664	15.8572	0.075
4	578	3	153.422	15.747	0.075
4	579	3	153.715	15.6987	0.075
4	581	3	154.213	15.6171	0.075
4	583	3	154.735	15.5325	0.075
4	585	3	155.254	15.4482	0.075
4	586	3	155.52	15.4072	0.075
4	589	3	156.318	15.2649	0.075
4	593	3	157.378	15.113	0.075
4	595	3	157.915	15.011	0.075
4	596	3	158.195	14.9605	0.075
4	612	3	162.468	14.3044	0.075
4	614	3	162.973	14.2141	0.075
4	615	3	163.228	14.1629	0.075
4	618	3	164.035	14.0349	0.075
4	621	3	164.822	13.8551	0.075
4	622	3	165.083	13.8186	0.075
4	624	3	165.532	13.747	0.075
4	625	3	165.84	13.6814	0.075
4	631	3	167.458	13.4133	0.075
4	632	3	167.743	13.3428	0.075
4	634	3	168.237	13.2539	0.075
4	637	3	169.274	13.0701	0.075
4	639	3	169.779	12.9527	0.075
4	641	3	170.305	12.7979	0.075
4	643	3	170.857	12.7056	0.075
4	644	3	171.129	12.6561	0.075
4	647	3	171.91	12.5919	0.075
4	648	3	172.239	12.5353	0.075
4	649	3	172.456	12.5004	0.075
4	651	3	172.973	12.4319	0.075
4	652	3	173.214	12.4173	0.075
4	653	3	173.475	12.3692	0.075
4	654	3	173.731	12.3352	0.075
4	655	3	173.977	12.297	0.075
4	657	3	174.54	12.207	0.075
4	659	3	175.094	12.1319	0.075
4	660	3	175.39	12.091	0.075
4	661	3	175.637	12.064	0.075
4	662	3	175.891	12.0383	0.075
4	665	3	176.829	11.9172	0.075
4	668	3	177.455	11.8366	0.075
4	670	3	177.933	11.7671	0.075
4	671	3	178.23	11.7087	0.075
4	674	3	179.071	11.5706	0.075
4	675	3	179.34	11.537	0.075
4	676	3	179.653	11.4901	0.075
4	677	3	179.871	11.4571	0.075
4	678	3	180.141	11.4156	0.075
4	679	3	180.41	11.3665	0.075
4	680	3	180.658	11.3277	0.075
4	681	3	180.94	11.2731	0.075
4	682	3	181.214	11.2195	0.075
4	683	3	181.47	11.17	0.075
4	684	3	181.734	11.0983	0.075
4	685	3	182.008	11.0582	0.075
4	688	3	182.79	10.9004	0.075
4	689	3	183.06	10.8357	0.075
4	690	3	183.319	10.7956	0.075
4	691	3	183.578	10.7438	0.075
4	692	3	183.852	10.6844	0.075
4	693	3	184.115	10.6399	0.075
4	694	3	184.384	10.5946	0.075
4	695	3	184.649	10.5421	0.075
4	696	3	184.913	10.5062	0.075
4	698	3	185.408	10.4347	0.075
4	700	3	185.8	10.3682	0.075
4	702	3	186.217	10.3006	0.075
4	703	3	186.464	10.2484	0.075
4	705	3	186.992	10.1689	0.075
4	706	3	187.312	10.1153	0.075
4	708	3	187.918	10.0221	0.075
4	709	3	188.207	9.9783	0.075
4	711	3	188.828	9.889	0.075
4	712	3	189.118	9.8315	0.075
4	713	3	189.363	9.7853	0.075
4	714	3	189.648	9.7458	0.075
4	716	3	190.202	9.663	0.075
4	717	3	190.467	9.6067	0.075
4	719	3	190.984	9.5382	0.075
4	720	3	191.249	9.4857	0.075
4	722	3	191.776	9.3985	0.075
4	723	3	192.036	9.3505	0.075
4	724	3	192.29	9.3071	0.075
4	726	3	192.831	9.2279	0.075
4	727	3	193.085	9.1845	0.075
4	728	3	193.347	9.1324	0.075
4	729	3	193.622	9.0903	0.075
4	731	3	194.155	9.0043	0.075
4	732	3	194.408	8.9533	0.075
4	733	3	194.675	8.9083	0.075
4	734	3	194.951	8.868	0.075
4	735	3	195.2	8.831	0.075
4	736	3	195.466	8.7861	0.075
4	737	3	195.781	8.7371	0.075
4	738	3	196.002	8.7036	0.075
4	739	3	196.291	8.6578	0.075
4	740	3	196.531	8.6085	0.075
4	742	3	197.062	8.5324	0.075
4	743	3	197.337	8.4845	0.075
4	744	3	197.603	8.4357	0.075
4	745	3	197.861	8.3957	0.075
4	746	3	198.103	8.3558	0.075
4	747	3	198.404	8.3131	0.075
4	748	3	198.646	8.2744	0.075
4	749	3	198.896	8.2334	0.075
4	750	3	199.175	8.1889	0.075
4	751	3	199.459	8.1456	0.075
4	752	3	199.679	8.1084	0.075
4	753	3	199.954	8.0702	0.075
4	754	3	200.227	8.0302	0.075
4	756	3	200.739	7.9566	0.075
4	758	3	201.278	7.8834	0.075
4	759	3	201.569	7.8451	0.075
4	760	3	201.823	7.8075	0.075
4	762	3	202.34	7.7448	0.075
4	764	3	202.867	7.6538	0.075
4	766	3	203.394	7.5666	0.075
4	770	3	204.451	7.3984	0.075
4	771	3	204.723	7.3494	0.075
4	773	3	205.265	7.2739	0.075
4	774	3	205.513	7.2235	0.075
4	776	3	206.044	7.1494	0.075
4	777	3	206.303	7.1034	0.075
4	778	3	206.574	7.0579	0.075
4	780	3	207.109	6.9833	0.075
4	782	3	207.644	6.9184	0.075
4	783	3	207.891	6.8875	0.075
4	784	3	208.165	6.8552	0.075
4	785	3	208.411	6.8128	0.075
4	786	3	208.697	6.7558	0.075
4	787	3	208.941	6.7132	0.075
4	788	3	209.194	6.6801	0.075
4	789	3	209.44	6.6435	0.075
4	790	3	209.711	6.598	0.075
4	792	3	210.254	6.5146	0.075
4	793	3	210.527	6.4747	0.075
4	794	3	210.794	6.4413	0.075
4	795	3	211.056	6.4066	0.075
4	796	3	211.332	6.3598	0.075
4	797	3	211.587	6.3144	0.075
4	798	3	211.85	6.2798	0.075
4	799	3	212.108	6.227	0.075
4	800	3	212.372	6.1765	0.075
4	801	3	212.611	6.1379	0.075
4	802	3	212.847	6.1084	0.075
4	803	3	213.106	6.0703	0.075
4	804	3	213.353	6.0355	0.075
4	805	3	213.6	5.9891	0.075
4	806	3	213.841	5.9651	0.075
4	807	3	214.109	5.9333	0.075
4	808	3	214.373	5.8964	0.075
4	809	3	214.628	5.8471	0.075
4	810	3	214.882	5.8056	0.075
4	811	3	215.139	5.7796	0.075
4	812	3	215.426	5.7328	0.075
4	816	3	216.573	5.5536	0.075
4	817	3	216.867	5.4742	0.075
4	818	3	217.151	5.3951	0.075
4	820	3	217.666	5.3223	0.075
4	821	3	217.923	5.2708	0.075
4	822	3	218.204	5.2221	0.075
4	823	3	218.479	5.1703	0.075
4	824	3	218.733	5.1192	0.075
4	825	3	218.989	5.0678	0.075
4	826	3	219.239	5.0172	0.075
4	827	3	219.51	4.9717	0.075
4	828	3	219.784	4.9161	0.075
4	829	3	220.042	4.8703	0.075
4	830	3	220.326	4.8038	0.075
4	831	3	220.584	4.7511	0.075
4	833	3	221.092	4.668	0.075
4	834	3	221.35	4.6205	0.075
4	835	3	221.588	4.5864	0.075
4	836	3	221.835	4.549	0.075
4	837	3	222.092	4.5016	0.075
4	838	3	222.376	4.4552	0.075
4	839	3	222.662	4.4107	0.075
4	840	3	222.9	4.3745	0.075
4	841	3	223.217	4.3043	0.075
4	842	3	223.456	4.2744	0.075
4	843	3	223.713	4.2292	0.075
4	844	3	224.001	4.178	0.075
4	845	3	224.28	4.1126	0.075
4	846	3	224.53	4.0748	0.075
4	847	3	224.808	4.0183	0.075
4	848	3	224.963	3.9902	0.075
4	849	3	225.261	3.9399	0.075
4	850	3	225.485	3.901	0.075
4	852	3	225.898	3.821	0.075
4	855	3	226.889	3.5686	0.075
4	856	3	227.184	3.5074	0.075
4	857	3	227.446	3.4412	0.075
4	858	3	227.709	3.3749	0.075
4	859	3	227.968	3.3135	0.075
4	860	3	228.242	3.2414	0.075
4	861	3	228.478	3.1829	0.075
4	862	3	228.715	3.1317	0.075
4	863	3	228.955	3.0804	0.075
4	864	3	229.178	3.0293	0.075
4	865	3	229.417	2.9704	0.075
4	866	3	229.656	2.9245	0.075
4	867	3	229.898	2.8725	0.075
4	869	3	230.343	2.7849	0.075
4	870	3	230.546	2.745	0.075
4	871	3	230.758	2.701	0.075
4	872	3	231.006	2.6439	0.075
4	873	3	231.327	2.5805	0.075
4	874	3	231.671	2.5143	0.075
4	875	3	232.058	2.4347	0.075
4	876	3	232.325	2.3882	0.075
4	877	3	232.714	2.3193	0.075
4	878	3	233.001	2.2718	0.075
4	879	3	233.246	2.2222	0.075
4	880	3	233.475	2.1834	0.075
4	881	3	233.703	2.1346	0.075
4	882	3	233.909	2.0929	0.075
4	883	3	234.115	2.057	0.075
4	884	3	234.301	2.0177	0.075
4	885	3	234.477	1.9754	0.075
4	886	3	234.628	1.9362	0.075
4	887	3	234.767	1.9043	0.075
4	888	3	234.875	1.8748	0.075
4	889	3	235.034	1.8331	0.075
4	890	3	235.348	1.7837	0.075
4	891	3	235.68	1.7248	0.075
4	892	3	235.98	1.6626	0.075
4	893	3	236.196	1.6196	0.075
4	894	3	236.398	1.5784	0.075
4	895	3	236.552	1.5446	0.075
4	896	3	236.673	1.5251	0.075
4	897	3	236.774	1.5052	0.075
4	898	3	236.86	1.4916	0.075
4	899	3	237.014	1.465	0.075
4	900	3	237.208	1.4306	0.075
4	901	3	237.308	1.405	0.075
4	902	3	237.378	1.3701	0.075
4	903	3	237.403	1.3438	0.075
4	212	3	55.972	30.4929	0.075
4	209	3	55.208	30.595	0.075
4	207	3	54.654	30.7036	0.075
4	206	3	54.404	30.7414	0.075
4	202	3	53.34	30.9072	0.075
4	201	3	53.086	30.9389	0.075
4	915	3	243.761	1.4241	0.075
4	921	3	244.904	1.6186	0.075
4	925	3	246.037	1.7989	0.075
4	927	3	246.496	1.8692	0.075
4	917	3	244.162	1.4882	0.075
4	918	3	244.332	1.5202	0.075
4	919	3	244.515	1.5502	0.075
4	920	3	244.702	1.5807	0.075
4	922	3	245.127	1.6529	0.075
4	923	3	245.38	1.6988	0.075
4	924	3	245.825	1.7592	0.075
4	928	3	246.731	1.9153	0.075
4	929	3	246.982	1.9538	0.075
4	930	3	247.253	1.9913	0.075
4	931	3	247.518	2.047	0.075
4	932	3	247.798	2.0904	0.075
4	933	3	248.068	2.1336	0.075
4	910	3	243.018	1.3155	0.075
4	911	3	243.132	1.3309	0.075
4	913	3	243.424	1.371	0.075
4	914	3	243.58	1.4012	0.075
4	934	3	248.368	2.183	0.075
4	935	3	248.685	2.231	0.075
4	936	3	248.983	2.2682	0.075
4	937	3	249.26	2.3171	0.075
4	943	3	250.567	2.5139	0.075
4	944	3	250.801	2.5479	0.075
4	945	3	251.033	2.5816	0.075
4	946	3	251.274	2.6034	0.075
4	947	3	251.522	2.6439	0.075
4	948	3	251.783	2.6897	0.075
4	949	3	252.05	2.7278	0.075
4	950	3	252.303	2.7606	0.075
4	951	3	252.633	2.7983	0.075
4	952	3	252.834	2.8329	0.075
4	953	3	253.108	2.8767	0.075
4	954	3	253.368	2.9283	0.075
4	955	3	253.637	2.975	0.075
4	956	3	253.891	3.0151	0.075
4	957	3	254.148	3.0555	0.075
4	958	3	254.402	3.0909	0.075
4	959	3	254.69	3.1423	0.075
4	960	3	254.965	3.1672	0.075
4	961	3	255.292	3.2092	0.075
4	962	3	255.598	3.257	0.075
4	963	3	255.877	3.3086	0.075
4	964	3	256.155	3.3552	0.075
4	965	3	256.466	3.4012	0.075
4	966	3	256.768	3.4545	0.075
4	967	3	257.141	3.5118	0.075
4	968	3	257.506	3.5741	0.075
4	970	3	258.14	3.6629	0.075
4	972	3	258.59	3.7405	0.075
4	974	3	259.091	3.8186	0.075
4	976	3	259.5	3.8864	0.075
4	975	3	259.271	3.8519	0.075
4	977	3	259.748	3.9389	0.075
4	978	3	260.028	3.9822	0.075
4	980	3	260.534	4.0431	0.075
4	986	3	261.84	4.2599	0.075
4	987	3	262.112	4.3046	0.075
4	988	3	262.386	4.3496	0.075
4	989	3	262.651	4.3922	0.075
4	991	3	263.239	4.4788	0.075
4	992	3	263.496	4.5252	0.075
4	994	3	264.076	4.6096	0.075
4	996	3	264.628	4.6881	0.075
4	997	3	264.875	4.7285	0.075
4	998	3	265.118	4.7684	0.075
4	999	3	265.354	4.8087	0.075
4	1000	3	265.587	4.8497	0.075
4	1001	3	265.862	4.8912	0.075
4	1003	3	266.393	4.9671	0.075
4	1005	3	266.883	5.0415	0.075
4	1010	3	268.177	5.2318	0.075
4	1007	3	267.358	5.1514	0.075
4	1006	3	267.109	5.1018	0.075
4	1008	3	267.629	5.199	0.075
4	1009	3	267.907	5.2409	0.075
4	1011	3	268.454	5.3283	0.075
4	1012	3	268.725	5.3693	0.075
4	1013	3	268.997	5.4117	0.075
4	1014	3	269.254	5.4557	0.075
4	1015	3	269.519	5.5126	0.075
4	1016	3	269.783	5.5587	0.075
4	1017	3	270.061	5.597	0.075
4	1018	3	270.295	5.631	0.075
4	1021	3	271.076	5.743	0.075
4	1020	3	270.814	5.709	0.075
4	1022	3	271.341	5.7975	0.075
4	1023	3	271.6	5.8358	0.075
4	1025	3	272.129	5.9067	0.075
4	1026	3	272.405	5.9329	0.075
4	1029	3	273.192	6.0325	0.075
4	1030	3	273.453	6.0853	0.075
4	1031	3	273.716	6.123	0.075
4	1032	3	273.984	6.1612	0.075
4	1035	3	274.777	6.3199	0.075
4	1034	3	274.512	6.2713	0.075
4	1037	3	275.317	6.3909	0.075
4	1038	3	275.583	6.442	0.075
4	1040	3	276.111	6.5188	0.075
4	1042	3	276.645	6.5891	0.075
4	1044	3	277.164	6.6706	0.075
4	1045	3	277.427	6.719	0.075
4	1047	3	277.949	6.808	0.075
4	1048	3	278.223	6.8542	0.075
4	1049	3	278.491	6.9008	0.075
4	1050	3	278.762	6.9442	0.075
4	1051	3	279.003	6.9981	0.075
4	1052	3	279.274	7.0379	0.075
4	1053	3	279.535	7.0587	0.075
4	1054	3	279.802	7.0944	0.075
4	1056	3	280.352	7.1656	0.075
4	1057	3	280.596	7.1984	0.075
4	1059	3	281.13	7.2961	0.075
4	1060	3	281.389	7.3404	0.075
4	1062	3	281.964	7.4242	0.075
4	1063	3	282.265	7.4737	0.075
4	1065	3	282.727	7.5481	0.075
4	1066	3	282.999	7.5929	0.075
4	1067	3	283.263	7.6425	0.075
4	1068	3	283.533	7.6929	0.075
4	1069	3	283.81	7.7442	0.075
4	1070	3	284.064	7.7891	0.075
4	1072	3	284.605	7.8662	0.075
4	1074	3	285.161	7.9417	0.075
4	1075	3	285.461	7.9804	0.075
4	1076	3	285.717	8.0195	0.075
4	1077	3	285.957	8.0638	0.075
4	1079	3	286.494	8.1416	0.075
4	1080	3	286.757	8.1852	0.075
4	1081	3	286.979	8.2201	0.075
4	1082	3	287.224	8.2757	0.075
4	1083	3	287.487	8.3146	0.075
4	1084	3	287.75	8.3558	0.075
4	1085	3	287.997	8.3914	0.075
4	1086	3	288.268	8.4289	0.075
4	1088	3	288.798	8.5046	0.075
4	1089	3	289.055	8.5558	0.075
4	1090	3	289.31	8.5972	0.075
4	1091	3	289.575	8.6446	0.075
4	1092	3	289.837	8.6857	0.075
4	1093	3	290.103	8.738	0.075
4	1095	3	290.639	8.8217	0.075
4	1096	3	290.899	8.8661	0.075
4	1097	3	291.164	8.9123	0.075
4	1099	3	291.695	8.9906	0.075
4	1101	3	289.773	8.7575	0.075
4	1098	3	291.431	8.9528	0.075
4	1137	3	301.759	10.5706	0.075
4	1153	3	306.251	11.3154	0.075
4	1164	3	309.159	11.7432	0.075
4	1173	3	311.534	12.0949	0.075
4	1180	3	313.389	12.3863	0.075
4	1184	3	314.43	12.5402	0.075
4	1193	3	316.687	12.8747	0.075
4	1138	3	302.038	10.6227	0.075
4	1139	3	302.307	10.6635	0.075
4	1141	3	302.832	10.7517	0.075
4	1144	3	303.629	10.8728	0.075
4	1146	3	304.169	10.9546	0.075
4	1147	3	304.687	11.0336	0.075
4	1148	3	304.944	11.0824	0.075
4	1149	3	305.229	11.1359	0.075
4	1151	3	305.757	11.2114	0.075
4	1155	3	306.78	11.4024	0.075
4	1157	3	307.307	11.4718	0.075
4	1158	3	307.583	11.5218	0.075
4	1160	3	308.1	11.5948	0.075
4	1166	3	309.685	11.8191	0.075
4	1167	3	309.943	11.8585	0.075
4	1169	3	310.471	11.9376	0.075
4	1170	3	310.742	11.9762	0.075
4	1172	3	311.27	12.0589	0.075
4	1177	3	312.59	12.2667	0.075
4	1179	3	313.125	12.3443	0.075
4	1182	3	313.921	12.4664	0.075
4	1183	3	314.187	12.5068	0.075
4	1189	3	315.792	12.7319	0.075
4	1190	3	316.04	12.77	0.075
4	1192	3	316.531	12.8409	0.075
4	1109	3	294.339	9.4002	0.075
4	1103	3	292.768	9.1604	0.075
4	1108	3	294.076	9.3489	0.075
4	1117	3	296.467	9.7418	0.075
4	1124	3	298.216	10.0545	0.075
4	1125	3	298.571	10.1036	0.075
4	1110	3	294.6	9.437	0.075
4	1113	3	295.46	9.5671	0.075
4	1114	3	295.669	9.6052	0.075
4	1116	3	296.205	9.6912	0.075
4	349	-4	92.119	25.5337	0.1
4	350	-4	92.419	25.4962	0.1
4	352	-4	92.974	25.4134	0.1
4	355	-4	93.698	25.3081	0.1
4	356	-4	93.977	25.2732	0.1
4	357	-4	94.28	25.2742	0.1
4	358	-4	94.521	25.2491	0.1
4	360	-4	95.048	25.1832	0.1
4	362	-4	95.584	25.1032	0.1
4	363	-4	95.86	25.0473	0.1
4	364	-4	96.13	25.0082	0.1
4	365	-4	96.414	24.9646	0.1
4	366	-4	96.666	24.9037	0.1
4	367	-4	96.916	24.8376	0.1
4	368	-4	97.187	24.7903	0.1
4	369	-4	97.462	24.768	0.1
4	371	-4	97.962	24.6988	0.1
4	372	-4	98.226	24.6685	0.1
4	373	-4	98.478	24.6611	0.1
4	375	-4	99.057	24.6115	0.1
4	376	-4	99.313	24.5755	0.1
4	377	-4	99.56	24.5526	0.1
4	378	-4	99.808	24.5283	0.1
4	379	-4	100.08	24.5091	0.1
4	381	-4	100.573	24.4528	0.1
4	382	-4	100.789	24.4365	0.1
4	384	-4	101.352	24.3849	0.1
4	386	-4	101.903	24.3535	0.1
4	388	-4	102.429	24.2904	0.1
4	390	-4	102.927	24.2121	0.1
4	395	-4	104.25	24.1217	0.1
4	396	-4	104.487	24.1002	0.1
4	398	-4	104.997	24.0364	0.1
4	399	-4	105.278	24.004	0.1
4	400	-4	105.548	23.9729	0.1
4	402	-4	106.096	23.9151	0.1
4	404	-4	106.645	23.8304	0.1
4	405	-4	106.94	23.7752	0.1
4	407	-4	107.472	23.6922	0.1
4	408	-4	107.754	23.6382	0.1
4	409	-4	108.023	23.6099	0.1
4	410	-4	108.301	23.5725	0.1
4	411	-4	108.58	23.5296	0.1
4	412	-4	108.812	23.4979	0.1
4	413	-4	109.109	23.4501	0.1
4	414	-4	109.33	23.4144	0.1
4	418	-4	110.43	23.2582	0.1
4	420	-4	110.953	23.2035	0.1
4	421	-4	111.215	23.1574	0.1
4	422	-4	111.49	23.1203	0.1
[truncated: 6,444 more rows]

## Sheet: Line2_Shots
Shot Number	Distance (km)	Elevation (km)	Latitude (deg)	Longitude (deg)
2	37.946	0.237	33.8085	-83.5573
3	51.569	0.2	33.6977	-83.4937
4	79.708	0.161	33.4504	-83.3924
5	97.87	0.183	33.3125	-83.2916
6	125.09	0.141	33.116	-83.1238
7	163.08	0.105	32.836	-82.8992
8	174.12	0.081	32.6992	-82.9246
9	201.17	0.067	32.4766	-82.8025
10	216.91	0.06	32.3599	-82.7105
12	279.57	0.073	31.8432	-82.4297
13	308.51	0.053	31.6376	-82.246
14	331.96	0.048	31.4303	-82.1637
15	356.22	0.022	31.2506	-82.0217
17	398.87	0.004	30.9066	-81.8178

## Sheet: Line2_Instruments
Instrument Number	Elevation (km)	Instrument Latitude (deg)	Instrument Longitude (deg)
1	0.01945	30.7707	-81.7153
2	0.0142	30.7724	-81.7153
3	0.01775	30.7743	-81.7151
4	0.017	30.7773	-81.713
5	0.01935	30.7777	-81.7168
6	0.02035	30.7778	-81.7216
7	0.02105	30.7775	-81.7262
8	0.01435	30.7767	-81.7327
9	0.0171	30.7761	-81.7387
10	0.0162	30.7759	-81.7434
11	0.01025	30.7768	-81.7473
12	0.01085	30.7776	-81.7504
13	0.00845	30.7792	-81.7506
14	0.0127	30.7815	-81.7506
15	0.00705	30.7826	-81.753
16	0.0162	30.7843	-81.7534
17	0.01595	30.7864	-81.7532
18	0.0127	30.7887	-81.7525
19	0.02025	30.7954	-81.7418
20	0.0187	30.7986	-81.7411
21	0.0109	30.8008	-81.7409
22	0.0128	30.8025	-81.7409
23	0.01465	30.804	-81.7409
24	0.01015	30.8044	-81.7453
25	0.01455	30.806	-81.7479
26	0.0149	30.807	-81.7492
27	0.01255	30.8083	-81.7506
28	0.0123	30.81	-81.7514
29	0.01005	30.8114	-81.7523
30	0.01015	30.8114	-81.7575
31	0.0107	30.8111	-81.7628
32	0.0131	30.8108	-81.7686
33	0.01805	30.8105	-81.7738
34	0.014	30.8103	-81.7782
35	0.01515	30.8098	-81.7881
36	0.013	30.8095	-81.7951
37	0.0137	30.809	-81.8035
38	0.01555	30.8086	-81.8113
39	0.01995	30.8083	-81.8183
40	0.0118	30.808	-81.8245
41	0.0098	30.8082	-81.8293
42	0.0118	30.81	-81.8335
43	0.0091	30.8114	-81.8363
44	0.01345	30.8128	-81.8393
45	0.01245	30.8141	-81.8419
46	0.0079	30.8154	-81.8445
47	0.0103	30.8168	-81.8474
48	0.00995	30.8183	-81.8505
49	0.007	30.8197	-81.8535
50	0.00935	30.8204	-81.8549
51	0.01105	30.8222	-81.8584
52	0.01115	30.8232	-81.8607
53	0.0097	30.8247	-81.8637
54	0.01055	30.8261	-81.8665
55	0.01055	30.8273	-81.869
56	0.0077	30.8288	-81.872
57	0.01215	30.83	-81.8746
58	0.01345	30.8315	-81.8778
59	0.01245	30.8332	-81.8823
60	0.01765	30.8344	-81.8855
61	0.01015	30.836	-81.8887
62	0.0121	30.8375	-81.8857
63	0.00715	30.8397	-81.8822
64	0.00975	30.8421	-81.8792
65	0.0107	30.8452	-81.8759
66	0.00875	30.8489	-81.8733
67	0.018	30.8534	-81.8701
68	0.01055	30.8585	-81.8625
69	0.01405	30.8613	-81.8499
70	0.01105	30.8657	-81.8393
71	0.01285	30.868	-81.8324
72	0.0137	30.8716	-81.8271
73	0.0123	30.874	-81.8238
74	0.00725	30.8765	-81.8206
75	0.01005	30.8787	-81.8189
76	0.01075	30.8803	-81.8178
77	0.0102	30.8832	-81.8157
78	0.01135	30.8856	-81.814
79	0.01645	30.8885	-81.8119
80	0.0178	30.8909	-81.8102
81	0.01585	30.8943	-81.8077
82	0.01595	30.8965	-81.806
83	0.01025	30.8986	-81.803
84	0.0101	30.901	-81.7991
85	0.0088	30.9038	-81.7947
86	0.0133	30.9229	-81.8235
87	0.01275	30.9251	-81.8224
88	0.0183	30.9257	-81.8248
89	0.01165	30.9263	-81.8269
90	0.01085	30.9277	-81.8284
91	0.00945	30.9291	-81.8297
92	0.00835	30.9302	-81.8309
93	0.0097	30.9313	-81.8321
94	0.0114	30.9324	-81.8333
95	0.0133	30.9338	-81.8348
96	0.0103	30.9354	-81.836
97	0.0118	30.9369	-81.8369
98	0.01275	30.9385	-81.8379
99	0.0111	30.9401	-81.8391
100	0.01205	30.9412	-81.8413
101	0.0125	30.9419	-81.8445
102	0.01505	30.9424	-81.8481
103	0.0085	30.9437	-81.8498
104	0.01545	30.9456	-81.85
105	0.0183	30.9479	-81.8495
106	0.0198	30.9503	-81.8489
107	0.02045	30.9526	-81.8483
108	0.0212	30.9548	-81.8478
109	0.0131	30.9571	-81.8471
110	0.01405	30.9595	-81.8465
111	0.01425	30.9618	-81.846
112	0.0137	30.9641	-81.8456
113	0.01075	30.966	-81.8458
114	0.0145	30.9682	-81.8452
115	0.01305	30.9709	-81.8441
116	0.0112	30.9732	-81.8431
117	0.0091	30.9757	-81.8422
118	0.0068	30.9769	-81.8442
119	0.00955	30.9782	-81.8457
120	0.00905	30.9797	-81.8472
121	0.01065	30.9811	-81.8488
122	0.01195	30.9824	-81.8508
123	0.01325	30.9832	-81.8534
124	0.00925	30.9841	-81.8562
125	0.01235	30.985	-81.8587
126	0.01515	30.9859	-81.8615
127	0.0209	30.9869	-81.8638
128	0.0223	30.988	-81.8662
129	0.0236	30.989	-81.8685
130	0.02465	30.9901	-81.8709
131	0.0246	30.9911	-81.873
132	0.0259	30.9928	-81.8739
133	0.02535	30.9948	-81.8741
134	0.0253	30.997	-81.8734
135	0.02585	30.9994	-81.8727
136	0.0316	31.0018	-81.8719
137	0.02865	31.0042	-81.8712
138	0.02925	31.0066	-81.8705
139	0.02955	31.0089	-81.8697
140	0.0342	31.0113	-81.869
141	0.02575	31.0142	-81.8681
142	0.0272	31.0166	-81.8674
143	0.0258	31.0195	-81.8665
144	0.02585	31.0213	-81.866
145	0.0281	31.0233	-81.8664
146	0.02415	31.0256	-81.8667
147	0.0269	31.0273	-81.8671
148	0.0302	31.0289	-81.8673
149	0.02465	31.0309	-81.8677
150	0.02735	31.0332	-81.8681
151	0.0288	31.0347	-81.8684
152	0.02675	31.0376	-81.8673
153	0.02615	31.041	-81.8655
154	0.02735	31.0439	-81.864
155	0.0301	31.0469	-81.8624
156	0.0299	31.049	-81.8613
157	0.02775	31.051	-81.8616
158	0.0287	31.0523	-81.8626
159	0.0279	31.0539	-81.8639
160	0.0273	31.056	-81.8659
161	0.02695	31.0579	-81.8693
162	0.02435	31.0592	-81.8721
163	0.02385	31.06	-81.8739
164	0.0217	31.0606	-81.8751
165	0.0243	31.0614	-81.8767
166	0.0191	31.0621	-81.8782
167	0.0207	31.063	-81.8802
168	0.0225	31.0638	-81.8815
169	0.0279	31.0662	-81.8832
170	0.0235	31.0688	-81.8833
171	0.0234	31.0714	-81.8832
172	0.0233	31.0739	-81.8828
173	0.0243	31.0766	-81.8826
174	0.0243	31.0791	-81.8824
175	0.02555	31.082	-81.8821
176	0.01955	31.0738	-81.9292
177	0.02755	31.0745	-81.9314
178	0.0327	31.0751	-81.9332
179	0.0303	31.0753	-81.9344
180	0.03585	31.0765	-81.9361
181	0.03285	31.0784	-81.936
182	0.03345	31.0807	-81.9379
183	0.0321	31.0815	-81.9399
184	0.03005	31.0835	-81.9397
185	0.02655	31.0855	-81.9394
186	0.02945	31.0876	-81.9393
187	0.02785	31.0897	-81.939
188	0.02905	31.092	-81.9385
189	0.0258	31.0942	-81.938
190	0.0256	31.096	-81.9391
191	0.0206	31.0975	-81.9405
192	0.02235	31.0987	-81.9417
193	0.01755	31.1004	-81.9433
194	0.0131	31.1019	-81.9449
195	0.01705	31.103	-81.9461
196	0.0156	31.1045	-81.9478
197	0.02115	31.1057	-81.9491
198	0.02215	31.1067	-81.9517
199	0.02445	31.1073	-81.9551
200	0.02655	31.109	-81.9565
201	0.02835	31.1112	-81.9567
202	0.03085	31.112	-81.9587
203	0.026	31.1125	-81.961
204	0.0268	31.1142	-81.9621
205	0.022	31.117	-81.9622
206	0.0227	31.1181	-81.9627
207	0.0234	31.1192	-81.9638
208	0.0259	31.1211	-81.9655
209	0.02615	31.1226	-81.967
210	0.0265	31.1241	-81.9685
211	0.0266	31.1262	-81.9669
212	0.0201	31.1294	-81.9673
213	0.0239	31.1308	-81.9657
214	0.0284	31.1349	-81.9622
215	0.03075	31.1382	-81.9597
216	0.02565	31.1389	-81.9622
217	0.0241	31.1419	-81.9626
218	0.0287	31.1442	-81.9614
219	0.02715	31.146	-81.9612
220	0.0263	31.1474	-81.9614
221	0.0215	31.1498	-81.9618
222	0.0247	31.1516	-81.9615
223	0.0182	31.1541	-81.9614
224	0.02405	31.156	-81.961
225	0.0253	31.1587	-81.9601
226	0.0256	31.1604	-81.9596
227	0.0243	31.1626	-81.9589
228	0.0278	31.1654	-81.9581
229	0.02825	31.1687	-81.9574
230	0.0249	31.1708	-81.9565
231	0.02265	31.1725	-81.956
232	0.02305	31.1747	-81.9553
233	0.02375	31.1768	-81.9546
234	0.0209	31.1791	-81.9539
235	0.0221	31.1809	-81.9533
236	0.0258	31.1833	-81.9534
237	0.02715	31.1841	-81.9563
238	0.0249	31.1855	-81.9588
239	0.02735	31.1863	-81.9607
240	0.0278	31.1875	-81.9633
241	0.03405	31.1887	-81.9661
242	0.0258	31.1898	-81.9678
243	0.02655	31.1914	-81.97
244	0.0255	31.1925	-81.9715
245	0.02865	31.1941	-81.9731
246	0.0253	31.1956	-81.9744
247	0.03335	31.1972	-81.9759
248	0.02425	31.198	-81.9778
249	0.0221	31.2053	-81.9824
250	0.02765	31.2059	-81.9826
252	0.0282	31.2081	-81.982
253	0.03015	31.2089	-81.9832
254	0.03545	31.2095	-81.9846
255	0.0282	31.2107	-81.9862
256	0.02755	31.2118	-81.9871
257	0.0302	31.2143	-81.9877
258	0.027	31.2156	-81.9875
259	0.0287	31.2169	-81.9873
260	0.0214	31.219	-81.987
261	0.0295	31.2206	-81.9867
262	0.02565	31.2229	-81.9869
263	0.02175	31.2251	-81.9876
264	0.0282	31.2264	-81.9881
265	0.02755	31.2284	-81.989
266	0.02615	31.2299	-81.9898
267	0.02155	31.2312	-81.9906
268	0.02295	31.233	-81.9913
269	0.0224	31.2355	-81.9919
270	0.02435	31.2374	-81.9928
271	0.025	31.2386	-81.9936
272	0.02595	31.2399	-81.9944
273	0.0265	31.2411	-81.9953
274	0.02375	31.2426	-81.9962
275	0.02275	31.2453	-81.9971
276	0.02485	31.2462	-81.9977
277	0.0276	31.2482	-81.9988
278	0.0257	31.2495	-81.9996
279	0.0245	31.2515	-82.0008
280	0.02595	31.2538	-82.0022
281	0.0332	31.255	-82.003
282	0.0251	31.2571	-82.0039
283	0.0286	31.2587	-82.0036
284	0.0237	31.2601	-82.0043
285	0.0234	31.2619	-82.0053
286	0.0251	31.2651	-82.0046
287	0.02855	31.2676	-82.0064
288	0.02535	31.2681	-82.0085
289	0.02405	31.2686	-82.0106
290	0.0208	31.2691	-82.0125
291	0.02455	31.2694	-82.0141
292	0.0219	31.271	-82.0159
293	0.0198	31.2723	-82.0161
294	0.023	31.2732	-82.0163
295	0.0171	31.2738	-82.0162
296	0.0221	31.2742	-82.0153
297	0.0214	31.2745	-82.015
298	0.0199	31.2949	-82.0463
299	0.023	31.2964	-82.0451
300	0.022	31.2988	-82.0444
301	0.0255	31.2998	-82.0469
302	0.0272	31.3016	-82.0474
303	0.0256	31.3035	-82.0477
304	0.0242	31.3053	-82.0485
305	0.0208	31.3068	-82.0495
306	0.02345	31.3086	-82.0501
307	0.02835	31.3106	-82.0503
308	0.02435	31.3127	-82.051
309	0.025	31.3144	-82.0514
310	0.0227	31.3161	-82.0516
311	0.02305	31.3186	-82.0511
312	0.0215	31.3207	-82.0515
313	0.02015	31.3222	-82.0519
314	0.0216	31.3239	-82.0522
315	0.02235	31.3257	-82.0513
316	0.0226	31.3274	-82.0497
317	0.0204	31.3293	-82.0497
318	0.02145	31.332	-82.0544
319	0.0217	31.3331	-82.0564
320	0.0224	31.3343	-82.0579
321	0.02235	31.3358	-82.0602
322	0.0224	31.3353	-82.0649
323	0.02405	31.3284	-82.0835
324	0.02975	31.3286	-82.0885
325	0.0298	31.3281	-82.1073
326	0.032	31.3303	-82.1074
327	0.03275	31.332	-82.1098
328	0.03485	31.3319	-82.1149
329	0.0353	31.3334	-82.1193
330	0.03205	31.3356	-82.1192
331	0.0301	31.3374	-82.1191
332	0.03215	31.3389	-82.1191
333	0.03025	31.3405	-82.1192
334	0.0305	31.3422	-82.1191
335	0.0357	31.3443	-82.1191
336	0.0293	31.3462	-82.1192
337	0.0335	31.348	-82.1192
338	0.0379	31.3501	-82.1191
339	0.0393	31.3522	-82.1189
340	0.0366	31.354	-82.1189
341	0.03505	31.3559	-82.1189
342	0.0351	31.3575	-82.1188
343	0.03705	31.3591	-82.1188
344	0.0378	31.3608	-82.1188
345	0.03875	31.3626	-82.1188
346	0.038	31.3645	-82.1187
347	0.03585	31.3685	-82.1187
348	0.0367	31.3708	-82.1186
349	0.03625	31.3725	-82.1185
350	0.03435	31.3742	-82.1186
351	0.0322	31.3755	-82.1185
352	0.0346	31.377	-82.1185
353	0.0339	31.3783	-82.1185
354	0.03405	31.3797	-82.1184
355	0.03305	31.3817	-82.1195
356	0.03125	31.3829	-82.1196
357	0.02735	31.396	-82.1011
358	0.02825	31.3979	-82.1016
359	0.0297	31.3989	-82.1034
360	0.0341	31.4007	-82.1038
361	0.0388	31.402	-82.1049
362	0.03705	31.4025	-82.1083
363	0.03535	31.404	-82.1099
364	0.0336	31.4053	-82.1114
365	0.0392	31.4066	-82.1132
366	0.037	31.409	-82.1128
367	0.04045	31.4106	-82.1136
368	0.0382	31.4115	-82.1162
369	0.03455	31.4133	-82.1166
370	0.03765	31.4154	-82.1166
371	0.0383	31.417	-82.1176
372	0.03585	31.4186	-82.1184
373	0.0382	31.4194	-82.1215
374	0.04825	31.4216	-82.1213
375	0.0422	31.4237	-82.1213
376	0.03945	31.4257	-82.1213
377	0.04115	31.4277	-82.1215
378	0.04255	31.4278	-82.126
379	0.0423	31.4294	-82.1271
380	0.042	31.4316	-82.1267
381	0.04365	31.4345	-82.1248
382	0.04525	31.4366	-82.1245
383	0.0444	31.4373	-82.1277
384	0.04825	31.4345	-82.139
385	0.0458	31.4353	-82.1417
386	0.0464	31.4374	-82.1417
387	0.04695	31.4394	-82.1417
388	0.05285	31.4417	-82.1413
389	0.04975	31.4442	-82.1402
390	0.0469	31.4463	-82.139
391	0.0463	31.4513	-82.1362
392	0.04675	31.4537	-82.1326
393	0.0544	31.456	-82.1319
394	0.04825	31.4584	-82.1311
395	0.04675	31.4583	-82.1363
396	0.04585	31.4588	-82.1397
397	0.04755	31.4594	-82.143
398	0.047	31.46	-82.1464
399	0.03975	31.4606	-82.1497
400	0.03635	31.4613	-82.1529
401	0.0349	31.4634	-82.1528
402	0.03225	31.4658	-82.1525
403	0.0323	31.468	-82.1518
404	0.0321	31.4704	-82.151
405	0.03315	31.4734	-82.1499
406	0.0309	31.4752	-82.1493
407	0.03395	31.4777	-82.1483
408	0.0333	31.4795	-82.1489
409	0.0339	31.4812	-82.1497
410	0.03645	31.4833	-82.1495
411	0.03655	31.4858	-82.1487
412	0.0361	31.4872	-82.1502
413	0.037	31.4872	-82.1547
414	0.0393	31.489	-82.1554
415	0.03825	31.4892	-82.1596
416	0.03975	31.4899	-82.1629
417	0.03805	31.492	-82.1627
418	0.04215	31.4941	-82.1627
419	0.04535	31.4961	-82.1628
420	0.04735	31.4981	-82.1627
421	0.0466	31.5002	-82.1627
422	0.0492	31.5023	-82.1627
423	0.05	31.5044	-82.1627
424	0.04875	31.5065	-82.1628
425	0.0492	31.5083	-82.163
426	0.0481	31.5082	-82.1677
427	0.05195	31.5083	-82.1724
428	0.03985	31.5091	-82.1755
429	0.04285	31.5097	-82.1787
430	0.045	31.5126	-82.1767
431	0.0486	31.5161	-82.1734
432	0.0433	31.5177	-82.1746
433	0.049	31.5178	-82.179
434	0.04685	31.5178	-82.1838
435	0.0469	31.5178	-82.1885
436	0.0476	31.518	-82.1926
437	0.04215	31.5205	-82.191
438	0.04815	31.5249	-82.1882
439	0.04795	31.5272	-82.1854
440	0.0489	31.5293	-82.1858
441	0.05095	31.5312	-82.1859
442	0.0505	31.5333	-82.186
443	0.05075	31.5353	-82.1861
444	0.05015	31.5369	-82.1871
445	0.0526	31.5389	-82.1872
446	0.0517	31.5414	-82.1864
447	0.05175	31.5435	-82.1862
448	0.05065	31.5442	-82.1895
449	0.05315	31.5432	-82.1964
450	0.0541	31.544	-82.1993
451	0.0522	31.546	-82.1995
452	0.0547	31.5481	-82.1994
453	0.056	31.5497	-82.2002
454	0.0531	31.5519	-82.2
455	0.05285	31.5541	-82.1996
456	0.0502	31.5562	-82.1994
457	0.05085	31.557	-82.2025
458	0.0527	31.5575	-82.2058
459	0.05135	31.5583	-82.2087
460	0.05325	31.56	-82.2095
461	0.0516	31.5625	-82.2087
462	0.0513	31.5646	-82.2085
463	0.0474	31.5667	-82.2085
464	0.0506	31.5687	-82.2087
465	0.05725	31.5708	-82.2087
466	0.05345	31.5728	-82.2084
467	0.0548	31.5749	-82.2086
468	0.0513	31.577	-82.2087
469	0.0453	31.5791	-82.2084
470	0.04435	31.5811	-82.2084
471	0.04555	31.5832	-82.2084
472	0.0476	31.5853	-82.2084
473	0.0405	31.5874	-82.2084
474	0.0474	31.5881	-82.2112
475	0.05145	31.5886	-82.2147
476	0.05015	31.5892	-82.2181
477	0.05075	31.5903	-82.2205
478	0.04875	31.5923	-82.2204
479	0.04505	31.5944	-82.2204
480	0.05015	31.5966	-82.2202
481	0.04925	31.5984	-82.221
482	0.051	31.5992	-82.2236
483	0.0492	31.6008	-82.2249
484	0.04855	31.6022	-82.2262
485	0.062	31.6036	-82.2276
486	0.05375	31.6051	-82.229
487	0.0581	31.6066	-82.2304
488	0.05595	31.608	-82.2318
489	0.0541	31.6092	-82.2339
490	0.05525	31.6102	-82.2364
491	0.05285	31.6111	-82.2388
492	0.05395	31.6121	-82.2414
493	0.05225	31.613	-82.2438
494	0.05175	31.6135	-82.2474
495	0.0509	31.6194	-82.2558
496	0.05135	31.6215	-82.2584
497	0.0518	31.6253	-82.2585
498	0.05085	31.6268	-82.2576
499	0.0602	31.629	-82.257
500	0.05755	31.6309	-82.2573
501	0.0597	31.6335	-82.2561
502	0.058	31.6353	-82.2553
503	0.0648	31.6374	-82.2545
504	0.05815	31.6404	-82.2518
505	0.06065	31.6434	-82.2496
506	0.0596	31.6464	-82.2477
507	0.0585	31.6481	-82.2481
508	0.05735	31.6498	-82.2485
509	0.062	31.6518	-82.2484
510	0.0574	31.654	-82.2482
511	0.0554	31.6559	-82.248
512	0.0594	31.6584	-82.2479
513	0.06155	31.6601	-82.2478
514	0.0618	31.6618	-82.2513
515	0.06505	31.6626	-82.253
516	0.05845	31.6646	-82.253
517	0.06265	31.6658	-82.2547
518	0.0573	31.6663	-82.2587
519	0.0566	31.6676	-82.2604
520	0.0599	31.6696	-82.2605
521	0.05825	31.6716	-82.2606
522	0.0594	31.6736	-82.2607
523	0.0592	31.6756	-82.2609
524	0.06055	31.6773	-82.2611
525	0.06205	31.6791	-82.2624
526	0.0596	31.6789	-82.2657
527	0.0583	31.6797	-82.2704
528	0.06535	31.6818	-82.2704
529	0.0629	31.6837	-82.2706
530	0.04595	31.6856	-82.2709
531	0.06375	31.6876	-82.2712
532	0.07115	31.6897	-82.2715
533	0.06275	31.6911	-82.2715
534	0.06745	31.6954	-82.2699
535	0.06365	31.6971	-82.2684
536	0.0631	31.699	-82.2685
537	0.0714	31.6999	-82.2711
538	0.0689	31.701	-82.2733
539	0.06305	31.7022	-82.2754
540	0.068	31.7036	-82.2771
541	0.06905	31.7049	-82.2787
542	0.063	31.7062	-82.2803
543	0.0655	31.7076	-82.2821
544	0.06605	31.7089	-82.2837
545	0.06505	31.7104	-82.2855
546	0.0703	31.7115	-82.287
547	0.06935	31.7131	-82.2882
548	0.0728	31.7147	-82.2892
549	0.073	31.7165	-82.2901
550	0.06645	31.718	-82.291
551	0.07095	31.7195	-82.292
552	0.07175	31.7212	-82.293
553	0.0716	31.7227	-82.2939
554	0.06515	31.7242	-82.2949
555	0.0611	31.726	-82.2962
556	0.06625	31.7277	-82.2972
557	0.0667	31.7293	-82.2983
558	0.0666	31.731	-82.2991
559	0.06975	31.7324	-82.3001
560	0.07055	31.7336	-82.3016
561	0.06595	31.7347	-82.303
562	0.06655	31.7362	-82.3049
563	0.06655	31.7376	-82.3069
564	0.06765	31.7389	-82.3085
565	0.0658	31.74	-82.3113
566	0.06125	31.7408	-82.3138
567	0.07665	31.7434	-82.3126
568	0.07185	31.7453	-82.3127
569	0.0703	31.7474	-82.3127
570	0.06555	31.7493	-82.3131
571	0.0678	31.7509	-82.3145
572	0.06465	31.7529	-82.3148
573	0.06265	31.7538	-82.3177
574	0.0679	31.7551	-82.319
575	0.06625	31.7572	-82.3187
576	0.06635	31.759	-82.3201
577	0.06795	31.7601	-82.3214
578	0.07285	31.7615	-82.323
579	0.07215	31.7629	-82.3246
580	0.069	31.7643	-82.3262
581	0.0698	31.7657	-82.3278
582	0.066	31.7671	-82.3294
583	0.06745	31.7682	-82.3312
584	0.0688	31.7694	-82.3333
585	0.0678	31.7705	-82.3354
586	0.06675	31.7717	-82.3375
587	0.06665	31.7727	-82.3396
588	0.06895	31.7748	-82.3398
589	0.0665	31.7769	-82.34
590	0.0693	31.7791	-82.3394
591	0.07015	31.7815	-82.3393
592	0.07035	31.7832	-82.3396
593	0.071	31.7855	-82.3393
594	0.0699	31.7873	-82.3391
595	0.06535	31.7895	-82.3396
596	0.0706	31.7908	-82.3409
597	0.068	31.7919	-82.3433
598	0.0672	31.7936	-82.3441
599	0.0688	31.7955	-82.3445
600	0.06495	31.7971	-82.3454
601	0.06515	31.7982	-82.348
602	0.0666	31.7989	-82.3501
603	0.067	31.802	-82.3492
604	0.06655	31.8043	-82.3478
605	0.0673	31.8065	-82.3479
606	0.06785	31.808	-82.3484
607	0.06945	31.8101	-82.3488
608	0.06735	31.8117	-82.3499
609	0.06445	31.8117	-82.3547
610	0.06395	31.8118	-82.3594
611	0.0664	31.812	-82.3629
612	0.06675	31.8139	-82.3635
613	0.06575	31.8155	-82.3641
614	0.0639	31.8172	-82.3653
615	0.06475	31.8186	-82.3664
616	0.0582	31.82	-82.3679
617	0.064	31.8214	-82.3699
618	0.0662	31.8225	-82.3722
619	0.06715	31.8236	-82.374
620	0.0688	31.825	-82.3756
621	0.0654	31.8264	-82.377
622	0.0662	31.8278	-82.3784
623	0.06595	31.8296	-82.3799
624	0.0653	31.8317	-82.3794
625	0.06315	31.8342	-82.3786
626	0.0645	31.8366	-82.3779
627	0.0682	31.8391	-82.3766
628	0.0686	31.8412	-82.3763
629	0.0685	31.8435	-82.3761
630	0.0705	31.8456	-82.3761
631	0.0694	31.8481	-82.375
632	0.0722	31.8502	-82.3749
633	0.0718	31.8521	-82.375
634	0.07195	31.8544	-82.3747
635	0.0738	31.8568	-82.3743
636	0.0709	31.8585	-82.3749
637	0.07845	31.859	-82.3788
638	0.07405	31.8604	-82.3803
639	0.0776	31.8606	-82.3841
640	0.0727	31.8619	-82.3858
641	0.07865	31.8635	-82.3862
642	0.0702	31.866	-82.3862
643	0.07045	31.868	-82.3862
644	0.07175	31.8699	-82.3863
645	0.0727	31.8686	-82.3945
646	0.07525	31.8678	-82.4007
647	0.07425	31.8681	-82.4048
648	0.07375	31.8684	-82.409
649	0.0736	31.8694	-82.4112
650	0.0734	31.8712	-82.4119
651	0.0744	31.8728	-82.4126
652	0.07505	31.8745	-82.4133
653	0.074	31.8761	-82.414
654	0.0798	31.8781	-82.4147
655	0.07775	31.88	-82.4154
656	0.07545	31.8817	-82.4159
657	0.0726	31.8836	-82.4159
658	0.07525	31.8859	-82.4158
659	0.07595	31.8878	-82.4158
660	0.0757	31.8899	-82.4158
661	0.0783	31.8921	-82.4158
662	0.0779	31.8943	-82.4157
663	0.07725	31.8964	-82.4157
664	0.0736	31.8984	-82.4153
665	0.07625	31.901	-82.4146
666	0.07485	31.904	-82.4119
667	0.07875	31.906	-82.4116
668	0.0711	31.9079	-82.4123
669	0.0669	31.9101	-82.4129
670	0.06435	31.9097	-82.418
671	0.06675	31.9084	-82.4252
672	0.06845	31.9097	-82.4266
673	0.06685	31.9113	-82.4281
674	0.06675	31.9129	-82.4295
675	0.0745	31.9146	-82.4317
676	0.0737	31.916	-82.4321
677	0.06825	31.9177	-82.433
678	0.06625	31.9195	-82.4339
679	0.07555	31.9218	-82.4349
680	0.0663	31.9233	-82.4352
681	0.0662	31.9255	-82.4356
682	0.0587	31.9282	-82.4363
683	0.0489	31.931	-82.431
684	0.04985	31.9325	-82.4311
685	0.04265	31.9348	-82.4311
686	0.0533	31.9369	-82.431
687	0.04775	31.9388	-82.431
688	0.04195	31.9408	-82.431
689	0.03875	31.9431	-82.4309
690	0.02945	31.945	-82.4317
691	0.0308	31.9458	-82.4342
692	0.0314	31.9466	-82.4374
693	0.03995	31.9473	-82.44
694	0.0304	31.9484	-82.4427
695	0.03325	31.9513	-82.4459
696	0.0533	31.9691	-82.4386
697	0.0579	31.9709	-82.4385
698	0.0499	31.973	-82.4383
699	0.0441	31.9752	-82.4379
700	0.048	31.9776	-82.4378
701	0.05565	31.9796	-82.4374
702	0.0583	31.9816	-82.4372
703	0.05115	31.9837	-82.437
704	0.06735	31.9836	-82.442
705	0.0675	31.984	-82.4462
706	0.07005	31.9837	-82.4514
707	0.07155	31.9841	-82.4556
708	0.07135	31.9844	-82.4591
709	0.0699	31.9885	-82.4551
710	0.06065	31.9928	-82.4497
711	0.06105	31.9949	-82.4489
712	0.0668	31.996	-82.4515
713	0.06795	31.9964	-82.4553
714	0.06465	31.9968	-82.4593
715	0.0619	31.9976	-82.4625
716	0.06435	31.9982	-82.4653
717	0.0693	31.9992	-82.4685
718	0.06945	32.0002	-82.471
719	0.06625	32.0011	-82.4732
720	0.0639	32.002	-82.4755
721	0.06775	32.0031	-82.4778
722	0.0723	32.0042	-82.4799
723	0.07505	32.0056	-82.482
724	0.06795	32.0072	-82.4831
725	0.0755	32.0087	-82.4841
726	0.07755	32.0103	-82.4853
727	0.07795	32.0118	-82.4865
728	0.07255	32.014	-82.486
729	0.0656	32.0163	-82.4855
730	0.0654	32.0185	-82.4851
731	0.0555	32.02	-82.4863
732	0.057	32.0217	-82.4873
733	0.05435	32.0245	-82.4854
734	0.0593	32.0269	-82.4849
735	0.06235	32.0274	-82.4881
736	0.0682	32.0285	-82.4907
737	0.0659	32.0296	-82.4931
738	0.0635	32.0308	-82.495
739	0.06445	32.0319	-82.4971
740	0.06665	32.033	-82.499
741	0.05935	32.0337	-82.5017
742	0.0557	32.0358	-82.5021
743	0.06415	32.0388	-82.5002
744	0.0605	32.0399	-82.5016
745	0.0639	32.0422	-82.5015
746	0.0635	32.0435	-82.505
747	0.0606	32.0453	-82.5041
748	0.06655	32.0483	-82.5027
749	0.0642	32.0507	-82.5016
750	0.0662	32.0535	-82.5003
751	0.06705	32.0552	-82.4995
752	0.0754	32.0576	-82.4983
753	0.07165	32.0603	-82.4976
754	0.0771	32.0627	-82.4972
755	0.0791	32.0649	-82.4962
756	0.0761	32.0676	-82.4954
757	0.07335	32.0678	-82.4998
758	0.06865	32.0663	-82.5078
759	0.0779	32.0675	-82.5096
760	0.0802	32.069	-82.5111
761	0.07065	32.0706	-82.5116
762	0.0649	32.0725	-82.512
763	0.0686	32.074	-82.5133
764	0.07265	32.0755	-82.514
765	0.08115	32.0773	-82.515
766	0.08215	32.0788	-82.5162
767	0.08455	32.0811	-82.5164
768	0.08665	32.0831	-82.5159
769	0.08665	32.0852	-82.5162
770	0.0874	32.0876	-82.5162
771	0.0881	32.0889	-82.5169
772	0.0868	32.0901	-82.5179
773	0.0892	32.0916	-82.5191
774	0.0889	32.0925	-82.52
775	0.0924	32.0945	-82.5223
776	0.09345	32.0962	-82.5238
777	0.09495	32.0979	-82.5247
778	0.0963	32.0998	-82.5256
779	0.09045	32.1014	-82.5265
780	0.08785	32.1028	-82.5273
781	0.08955	32.1052	-82.528
782	0.08425	32.1066	-82.5284
783	0.0914	32.107	-82.5327
784	0.09275	32.1079	-82.5358
785	0.0931	32.1092	-82.5372
786	0.0921	32.1115	-82.5359
787	0.09205	32.1145	-82.5347
788	0.09	32.1167	-82.5336
789	0.08905	32.1188	-82.5336
790	0.0903	32.1213	-82.5331
791	0.0922	32.1264	-82.5261
792	0.0915	32.1282	-82.5265
793	0.0945	32.1298	-82.5272
794	0.08775	32.1309	-82.5286
795	0.08695	32.1326	-82.5311
796	0.0865	32.1337	-82.5328
797	0.0836	32.135	-82.5348
798	0.0803	32.1361	-82.5366
799	0.07795	32.1374	-82.5387
800	0.07775	32.1386	-82.5404
801	0.072	32.1396	-82.5418
802	0.0663	32.1413	-82.5435
803	0.06155	32.1426	-82.5453
804	0.0643	32.1439	-82.5466
805	0.0686	32.1457	-82.5477
806	0.0708	32.1472	-82.5485
807	0.0767	32.1489	-82.5492
808	0.0792	32.1509	-82.55
809	0.0749	32.1524	-82.5508
810	0.0705	32.1541	-82.5517
811	0.0719	32.156	-82.553
812	0.0723	32.1572	-82.5544
813	0.0725	32.1583	-82.5562
814	0.07875	32.1595	-82.5581
815	0.0855	32.161	-82.5606
816	0.0861	32.1628	-82.5612
817	0.0866	32.1644	-82.561
818	0.0869	32.1669	-82.5606
819	0.08515	32.1691	-82.5602
820	0.0851	32.1709	-82.5599
821	0.08305	32.1731	-82.5605
822	0.08755	32.175	-82.5611
823	0.0833	32.1765	-82.5618
824	0.08635	32.1782	-82.5637
825	0.0766	32.1763	-82.5723
826	0.06485	32.1761	-82.5778
827	0.06835	32.1761	-82.5822
828	0.07565	32.1778	-82.5831
829	0.07795	32.1798	-82.5837
830	0.0783	32.1813	-82.5845
831	0.07715	32.183	-82.5856
832	0.0744	32.1845	-82.5865
833	0.0727	32.1862	-82.5876
834	0.06675	32.1873	-82.5892
835	0.06075	32.1887	-82.5915
836	0.06535	32.1906	-82.5941
837	0.06895	32.1926	-82.5951
838	0.0639	32.1945	-82.5956
839	0.0632	32.1961	-82.5961
840	0.05885	32.1975	-82.5965
841	0.0573	32.1991	-82.5969
842	0.0577	32.2004	-82.5974
843	0.06045	32.2021	-82.5979
844	0.06005	32.2039	-82.5984
845	0.05655	32.2058	-82.5985
846	0.0503	32.2081	-82.5984
847	0.05325	32.2102	-82.5981
848	0.0508	32.212	-82.5983
849	0.05705	32.214	-82.5986
850	0.0584	32.2158	-82.5993
851	0.06685	32.2175	-82.5997
852	0.0617	32.2191	-82.6005
853	0.06215	32.2206	-82.6015
854	0.0617	32.222	-82.6022
855	0.05915	32.2236	-82.6032
856	0.0547	32.2254	-82.6047
857	0.05	32.2268	-82.6056
858	0.0497	32.2287	-82.6067
859	0.04935	32.2309	-82.6071
860	0.0504	32.2328	-82.607
861	0.0549	32.2351	-82.6068
862	0.0582	32.2371	-82.6066
863	0.0598	32.2394	-82.6063
864	0.0545	32.2413	-82.6063
865	0.06515	32.2438	-82.6061
866	0.07	32.246	-82.606
867	0.07325	32.2484	-82.6057
868	0.0743	32.2507	-82.6048
869	0.07485	32.2523	-82.6054
870	0.07825	32.2538	-82.6068
871	0.0719	32.2552	-82.6081
872	0.06465	32.2564	-82.6094
873	0.06505	32.2583	-82.6109
874	0.0654	32.2596	-82.6119
875	0.06845	32.2614	-82.6133
876	0.0616	32.2628	-82.6144
877	0.05665	32.2644	-82.6158
878	0.0491	32.2657	-82.6168
879	0.0487	32.2669	-82.6178
880	0.0349	32.2685	-82.619
881	0.0598	32.2704	-82.6207
882	0.06175	32.2721	-82.6224
883	0.0628	32.2735	-82.6238
884	0.0657	32.2747	-82.6252
885	0.0667	32.276	-82.6265
886	0.06475	32.2773	-82.6278
887	0.06605	32.2787	-82.6293
888	0.06595	32.2801	-82.6308
889	0.0656	32.2816	-82.6322
890	0.06465	32.2835	-82.6333
891	0.06335	32.2851	-82.6339
892	0.0638	32.2872	-82.6344
893	0.06735	32.2893	-82.6342
894	0.06945	32.2912	-82.6341
895	0.0734	32.2938	-82.6339
896	0.07	32.2959	-82.6337
897	0.06975	32.298	-82.6337
898	0.07175	32.2998	-82.634
899	0.0732	32.3017	-82.6346
900	0.07	32.3035	-82.6351
901	0.07075	32.3054	-82.6354
902	0.0691	32.3066	-82.6372
903	0.06165	32.3076	-82.6398
904	0.0586	32.3085	-82.6424
905	0.05405	32.3095	-82.6449
906	0.05035	32.3104	-82.6474
907	0.04925	32.3111	-82.6488
908	0.0522	32.3131	-82.6509
909	0.0514	32.3144	-82.6526
910	0.05235	32.3157	-82.6542
911	0.05495	32.3171	-82.6558
912	0.05935	32.3185	-82.6574
913	0.0609	32.3199	-82.6591
914	0.06305	32.3211	-82.6605
915	0.06435	32.3225	-82.6623
916	0.06555	32.3234	-82.6638
917	0.06655	32.3249	-82.6662
918	0.06335	32.3259	-82.6676
919	0.0692	32.3274	-82.6699
920	0.07435	32.3287	-82.6716
921	0.0774	32.33	-82.6732
922	0.07615	32.3315	-82.6747
923	0.07895	32.3328	-82.6764
924	0.075	32.3344	-82.6776
925	0.07135	32.3359	-82.679
926	0.07135	32.3373	-82.6804
927	0.07485	32.3389	-82.6816
928	0.0803	32.3401	-82.6831
929	0.08595	32.3416	-82.6844
930	0.0835	32.3432	-82.6858
931	0.0836	32.3447	-82.6871
932	0.08915	32.3459	-82.6889
933	0.08935	32.3472	-82.6906
934	0.0899	32.3487	-82.6923
935	0.0893	32.351	-82.6919
936	0.0908	32.3542	-82.6893
937	0.09015	32.3568	-82.6884
938	0.08235	32.3592	-82.6875
939	0.07725	32.3613	-82.6869
940	0.08245	32.3636	-82.6865
941	0.08535	32.3658	-82.6856
942	0.09175	32.3665	-82.6892
943	0.08545	32.3679	-82.6906
944	0.07805	32.3693	-82.6919
945	0.08395	32.371	-82.6929
946	0.08925	32.3725	-82.694
947	0.08875	32.3746	-82.6941
948	0.0884	32.3764	-82.6948
949	0.08015	32.3784	-82.6951
950	0.0726	32.3796	-82.6964
951	0.0677	32.3805	-82.6992
952	0.0668	32.3816	-82.7014
953	0.0706	32.3829	-82.7039
954	0.07035	32.3837	-82.7061
955	0.06335	32.385	-82.7078
956	0.0642	32.3862	-82.7096
957	0.0675	32.3876	-82.7116
958	0.0605	32.389	-82.7138
959	0.0525	32.3899	-82.7158
960	0.0528	32.3914	-82.7173
961	0.061	32.3938	-82.7165
962	0.0572	32.396	-82.7149
963	0.0677	32.3989	-82.7139
964	0.067	32.401	-82.7134
965	0.06195	32.403	-82.714
966	0.06605	32.4046	-82.7152
967	0.06635	32.4063	-82.7162
968	0.0757	32.409	-82.7165
969	0.07415	32.4103	-82.7165
970	0.0759	32.4125	-82.7161
971	0.07605	32.4146	-82.716
972	0.076	32.4164	-82.7164
973	0.0793	32.4181	-82.7172
974	0.08605	32.4196	-82.7186
975	0.08695	32.4213	-82.7197
976	0.08275	32.423	-82.7204
977	0.08225	32.4246	-82.7213
978	0.08755	32.4264	-82.7218
979	0.08315	32.4284	-82.7223
980	0.0835	32.4301	-82.7228
981	0.08295	32.432	-82.7233
982	0.08335	32.4338	-82.7239
983	0.0816	32.4356	-82.7245
984	0.08845	32.4375	-82.7248
985	0.096	32.4395	-82.7251
986	0.0927	32.4413	-82.7254
987	0.09495	32.4424	-82.7256
988	0.09365	32.4451	-82.726
989	0.09145	32.4469	-82.7272
990	0.08695	32.4481	-82.7291
991	0.0951	32.4494	-82.7308
992	0.08615	32.4506	-82.7327
993	0.08675	32.452	-82.7345
994	0.0801	32.4532	-82.7363
995	0.08075	32.4544	-82.738
996	0.08715	32.4562	-82.7389
997	0.0962	32.4579	-82.7397
998	0.0984	32.4595	-82.7408
999	0.09395	32.461	-82.7419
1000	0.09135	32.4624	-82.7436
1001	0.08995	32.4636	-82.7454
1002	0.09065	32.4647	-82.7477
1003	0.0893	32.4656	-82.7502
1004	0.0873	32.4663	-82.7533
1005	0.07245	32.4669	-82.7568
1006	0.06725	32.4678	-82.7593
1007	0.0719	32.4692	-82.7608
1008	0.0792	32.471	-82.7612
1009	0.08275	32.4728	-82.762
1010	0.08115	32.4745	-82.763
1011	0.0847	32.4761	-82.764
1012	0.08705	32.4779	-82.7648
1013	0.07315	32.4804	-82.7639
1014	0.0707	32.4826	-82.763
1015	0.07735	32.4847	-82.7625
1016	0.0784	32.4874	-82.7625
1017	0.0722	32.4887	-82.7639
1018	0.07575	32.4901	-82.7654
1019	0.0723	32.4915	-82.7668
1020	0.07345	32.4927	-82.7681
1021	0.0587	32.4943	-82.7697
1022	0.06405	32.4956	-82.7713
1023	0.06605	32.4968	-82.7728
1024	0.0704	32.4984	-82.775
1025	0.0729	32.4996	-82.7764
1026	0.0788	32.5009	-82.7782
1027	0.08155	32.5023	-82.78
1028	0.0711	32.5036	-82.7816
1029	0.0709	32.5047	-82.783
1030	0.07585	32.506	-82.7847
1031	0.0748	32.5074	-82.7867
1032	0.0821	32.5087	-82.7883
1033	0.07975	32.5099	-82.7897
1034	0.0778	32.5112	-82.7915
1035	0.0843	32.5129	-82.7933
1036	0.08665	32.5142	-82.795
1037	0.0888	32.5155	-82.797
1038	0.09515	32.5166	-82.7985
1039	0.0937	32.5179	-82.8001
1040	0.0911	32.5191	-82.8017
1041	0.0879	32.5205	-82.8035
1042	0.0826	32.5221	-82.8057
1043	0.09085	32.5249	-82.8037
1044	0.101	32.527	-82.8021
1045	0.08885	32.5308	-82.7993
1046	0.085	32.5332	-82.7985
1047	0.0957	32.5356	-82.7978
1048	0.0927	32.5374	-82.7986
1049	0.09295	32.5392	-82.7993
1050	0.0984	32.5409	-82.8
1051	0.0944	32.5426	-82.8007
1052	0.0983	32.5444	-82.8014
1053	0.10185	32.5464	-82.8016
1054	0.1016	32.5485	-82.8014
1055	0.10135	32.5506	-82.8013
1056	0.11185	32.5529	-82.8006
1057	0.10215	32.5545	-82.8021
1058	0.10285	32.5554	-82.8047
1059	0.0948	32.5562	-82.8073
1060	0.0877	32.5575	-82.8092
1061	0.08965	32.559	-82.8103
1062	0.0916	32.5606	-82.8114
1063	0.0961	32.5624	-82.8121
1064	0.08715	32.5605	-82.8213
1065	0.08275	32.5603	-82.8264
1066	0.0849	32.5625	-82.8261
1067	0.0914	32.5647	-82.8258
1068	0.0949	32.5669	-82.8253
1069	0.09585	32.5688	-82.8256
1070	0.0938	32.5706	-82.8263
1071	0.0903	32.5723	-82.8273
1072	0.088	32.5739	-82.8282
1073	0.08565	32.5756	-82.8294
1074	0.0846	32.5766	-82.8316
1075	0.0896	32.5778	-82.8336
1076	0.086	32.579	-82.8355
1077	0.07875	32.5807	-82.8368
1078	0.06855	32.5833	-82.8352
1079	0.0755	32.5862	-82.8334
1080	0.0852	32.589	-82.8316
1081	0.0853	32.592	-82.8296
1082	0.0786	32.5952	-82.8269
1083	0.07545	32.598	-82.8252
1084	0.07295	32.6008	-82.8237
1085	0.0714	32.6034	-82.8222
1086	0.0741	32.6061	-82.8205
1087	0.0711	32.609	-82.8191
1088	0.07675	32.6117	-82.8175
1089	0.079	32.6144	-82.816
1090	0.0859	32.6169	-82.8148
1091	0.08875	32.6182	-82.8166
1092	0.09075	32.6193	-82.8191
1093	0.0737	32.6202	-82.8214
1094	0.07305	32.6206	-82.8253
1095	0.08095	32.6212	-82.8286
1096	0.0865	32.6225	-82.8304
1097	0.0842	32.624	-82.8318
1098	0.0825	32.6256	-82.8328
1099	0.0843	32.6273	-82.8337
1100	0.08365	32.6289	-82.8347
1101	0.08555	32.6305	-82.8356
1102	0.08755	32.6321	-82.8367
1103	0.08895	32.6337	-82.8379
1104	0.08615	32.6352	-82.839
1105	0.0837	32.6368	-82.8402
1106	0.08565	32.6356	-82.8476
1107	0.0766	32.6354	-82.8529
1108	0.0752	32.636	-82.8563
1109	0.0866	32.6372	-82.858
1110	0.08765	32.6387	-82.8595
1111	0.08485	32.6404	-82.8603
1112	0.0873	32.642	-82.8614
1113	0.08835	32.6436	-82.8624
1114	0.0914	32.6452	-82.8635
1115	0.0891	32.6466	-82.8651
1116	0.08805	32.648	-82.8666
1117	0.08845	32.6495	-82.868
1118	0.09235	32.651	-82.8691
1119	0.09435	32.6521	-82.8713
1120	0.09755	32.6538	-82.8721
1121	0.1016	32.6557	-82.8726
1122	0.10445	32.6566	-82.8753
1123	0.10375	32.6576	-82.8777
1124	0.0997	32.6586	-82.8801
1125	0.09785	32.6597	-82.8822
1126	0.0931	32.6607	-82.8847
1127	0.0925	32.6611	-82.8885
1128	0.09215	32.6615	-82.8923
1129	0.0922	32.6622	-82.8959
1130	0.095	32.6642	-82.8954
1131	0.08395	32.6669	-82.8943
1132	0.0841	32.6686	-82.8948
1133	0.0759	32.6704	-82.8955
1134	0.082	32.6725	-82.8956
1135	0.08675	32.6748	-82.8951
1136	0.09265	32.6773	-82.8939
1137	0.0938	32.6799	-82.8928
1138	0.0959	32.6822	-82.8921
1139	0.09435	32.6841	-82.8927
1140	0.0947	32.6855	-82.8941
1141	0.0959	32.6869	-82.8955
1142	0.0908	32.6884	-82.897
1143	0.0914	32.6897	-82.8986
1144	0.09025	32.691	-82.9003
1145	0.09015	32.6923	-82.9021
1146	0.0817	32.6934	-82.904
1147	0.0772	32.6946	-82.9064
1148	0.08505	32.6958	-82.9084
1149	0.087	32.697	-82.9101
1150	0.07695	32.6984	-82.9118
1151	0.0775	32.6996	-82.9131
1152	0.0784	32.7012	-82.9148
1153	0.0793	32.7027	-82.9161
1154	0.084	32.7043	-82.9172
1155	0.09565	32.706	-82.9182
1156	0.093	32.7079	-82.9183
1157	0.09775	32.7102	-82.9178
1158	0.09665	32.7125	-82.9174
1159	0.0975	32.7148	-82.9169
1160	0.1009	32.7171	-82.9164
1161	0.10135	32.7194	-82.9158
1162	0.10305	32.722	-82.9146
1163	0.1038	32.7249	-82.9126
1164	0.0989	32.7281	-82.9101
1165	0.0965	32.7304	-82.9096
1166	0.09605	32.7324	-82.9094
1167	0.09335	32.7341	-82.9105
1168	0.10235	32.7354	-82.9124
1169	0.1086	32.7365	-82.9142
1170	0.1064	32.7378	-82.9161
1171	0.08995	32.739	-82.918
1172	0.08095	32.7403	-82.92
1173	0.07845	32.7418	-82.9212
1174	0.0819	32.7434	-82.9223
1175	0.0891	32.745	-82.9234
1176	0.08915	32.7463	-82.9243
1177	0.0871	32.7479	-82.9252
1178	0.0969	32.7498	-82.9262
1179	0.0986	32.7516	-82.9266
1180	0.10175	32.7536	-82.9271
1181	0.1048	32.7552	-82.9276
1182	0.10495	32.7568	-82.9284
1183	0.1081	32.7587	-82.9292
1184	0.11095	32.7602	-82.9297
1185	0.1093	32.7623	-82.9304
1186	0.1109	32.7642	-82.9306
1187	0.11495	32.7664	-82.9304
1188	0.11685	32.7688	-82.9299
1189	0.12005	32.7712	-82.9293
1190	0.1209	32.7732	-82.9288
1191	0.12455	32.7757	-82.9281
1192	0.1212	32.7781	-82.9275
1193	0.1205	32.7806	-82.9266
1194	0.1128	32.7837	-82.9249
1195	0.11155	32.7874	-82.9211
1196	0.11045	32.7904	-82.9186
1197	0.11305	32.7936	-82.9161
1198	0.11085	32.7965	-82.9146
1199	0.11195	32.798	-82.9142
1200	0.1106	32.8005	-82.9142
1201	0.11225	32.8027	-82.9139
1202	0.1138	32.8047	-82.9135
1203	0.11515	32.8066	-82.9135
1205	0.12495	32.8107	-82.9137
1206	0.12625	32.8125	-82.9145
1207	0.1238	32.8143	-82.9152
1208	0.12185	32.8155	-82.9159
1209	0.11945	32.8175	-82.9172
1210	0.13045	32.8187	-82.9185
1211	0.13655	32.8204	-82.9209
1212	0.13795	32.8216	-82.9225
1213	0.13445	32.8228	-82.9241
1214	0.13335	32.824	-82.9259
1215	0.1292	32.8254	-82.9278
1216	0.13	32.8266	-82.9297
1217	0.1324	32.8281	-82.9312
1218	0.1295	32.8296	-82.9331
1219	0.12735	32.8307	-82.9347
1220	0.13275	32.8321	-82.9363
1221	0.13345	32.8335	-82.9377
1222	0.13425	32.8348	-82.9395
1223	0.1335	32.836	-82.9417
1224	0.13385	32.8372	-82.9436
1225	0.1255	32.8387	-82.9453
1226	0.11085	32.8402	-82.9461
1227	0.11105	32.8422	-82.9458
1228	0.11	32.8432	-82.9459
1229	0.1228	32.8457	-82.9484
1230	0.12105	32.8471	-82.9491
1231	0.11625	32.8485	-82.9494
1232	0.1121	32.8507	-82.9505
1233	0.0998	32.8525	-82.9506
1234	0.0885	32.8542	-82.9509
1235	0.08335	32.8562	-82.9511
1236	0.07005	32.8583	-82.9519
1237	0.079	32.8611	-82.9505
1238	0.07775	32.8635	-82.9494
1239	0.081	32.8661	-82.948
1240	0.09355	32.868	-82.9481
1241	0.10665	32.8698	-82.9489
1242	0.1188	32.8721	-82.9489
1243	0.12125	32.8744	-82.9484
1244	0.12485	32.8776	-82.9461
1245	0.1295	32.8796	-82.9452
1246	0.131	32.8815	-82.9455
1247	0.13495	32.8835	-82.9462
1248	0.1286	32.885	-82.9471
1249	0.125	32.8868	-82.9488
1250	0.10905	32.8876	-82.9514
1251	0.09325	32.8885	-82.954
1252	0.0817	32.8894	-82.9567
1253	0.0738	32.8903	-82.9591
1254	0.0687	32.8913	-82.9609
1255	0.0707	32.8926	-82.9628
1256	0.0781	32.8938	-82.9645
1257	0.078	32.8953	-82.9663
1258	0.07955	32.8969	-82.9672
1259	0.0764	32.8988	-82.9681
1260	0.0784	32.9002	-82.9689
1261	0.07765	32.9019	-82.9697
1262	0.07975	32.9038	-82.9706
1263	0.0802	32.9055	-82.9716
1264	0.0834	32.9067	-82.9731
1265	0.0811	32.9081	-82.9751
1266	0.0882	32.909	-82.9774
1267	0.09745	32.9099	-82.9801
1268	0.09625	32.9108	-82.9827
1269	0.0989	32.9119	-82.985
1270	0.0992	32.9129	-82.9869
1271	0.10355	32.9146	-82.9884
1272	0.10235	32.9158	-82.99
1273	0.10585	32.9172	-82.9927
1274	0.1115	32.918	-82.9955
1275	0.1088	32.9187	-82.9977
1276	0.1136	32.9198	-82.9993
1277	0.1138	32.9213	-83.001
1278	0.11505	32.9227	-83.0026
1279	0.11755	32.9241	-83.0041
1280	0.1239	32.9255	-83.0055
1281	0.12035	32.9267	-83.0079
1282	0.11835	32.9275	-83.0109
1283	0.1181	32.9289	-83.0127
1284	0.1151	32.9302	-83.0142
1285	0.119	32.9313	-83.0157
1286	0.12415	32.9325	-83.0176
1287	0.1347	32.9339	-83.0192
1288	0.13215	32.9354	-83.0201
1289	0.1367	32.9373	-83.0215
1290	0.128	32.9387	-83.0224
1291	0.1303	32.9402	-83.0233
1292	0.1366	32.9419	-83.0245
1293	0.13475	32.9436	-83.0255
1294	0.1355	32.9451	-83.0264
1295	0.12825	32.947	-83.0276
1296	0.10705	32.9485	-83.0285
1297	0.0977	32.9503	-83.0298
1298	0.0928	32.9517	-83.031
1299	0.08455	32.9533	-83.0322
1300	0.07835	32.9546	-83.0335
1301	0.04145	32.9563	-83.0346
1302	0.08885	32.9578	-83.0359
1303	0.0892	32.9595	-83.0372
1304	0.09145	32.961	-83.0383
1305	0.097	32.9626	-83.0396
1306	0.09915	32.9641	-83.0408
1307	0.10125	32.9657	-83.042
1308	0.10275	32.9673	-83.0429
1309	0.10545	32.969	-83.0436
1310	0.1126	32.9707	-83.0443
1311	0.11185	32.9726	-83.045
1312	0.1095	32.9743	-83.0458
1313	0.09905	32.9758	-83.0465
1314	0.09295	32.9775	-83.0482
1315	0.0868	32.9784	-83.0504
1316	0.0812	32.9798	-83.0515
1317	0.08445	32.9814	-83.0532
1318	0.09055	32.9831	-83.0551
1319	0.0911	32.9844	-83.0571
1320	0.0918	32.9855	-83.0588
1321	0.09295	32.9865	-83.0606
1322	0.08545	32.9877	-83.0622
1323	0.0822	32.9888	-83.064
1324	0.0836	32.9903	-83.0661
1325	0.08225	32.9912	-83.0687
1326	0.08255	32.9918	-83.0717
1327	0.079	32.9925	-83.0752
1328	0.08105	32.9936	-83.0771
1329	0.08955	32.9951	-83.0789
1330	0.0881	32.9961	-83.0805
1331	0.09185	32.9974	-83.0823
1332	0.0961	32.9988	-83.0842
1333	0.09675	33.0003	-83.0856
1334	0.0975	33.0017	-83.087
1335	0.1014	33.0031	-83.0885
1336	0.098	33.0045	-83.0898
1337	0.09695	33.006	-83.0914
1338	0.0976	33.0076	-83.0928
1339	0.0959	33.0089	-83.0943
1340	0.0952	33.0103	-83.0957
1341	0.09545	33.0117	-83.0966
1342	0.10115	33.0134	-83.0977
1343	0.10535	33.0151	-83.0987
1344	0.11605	33.0168	-83.0997
1345	0.11845	33.0186	-83.1006
1346	0.1183	33.0201	-83.1015
1347	0.1218	33.0217	-83.1027
1348	0.129	33.0233	-83.1038
1349	0.13085	33.025	-83.1048
1350	0.13005	33.0266	-83.1057
1351	0.1281	33.028	-83.1067
1352	0.1218	33.0297	-83.1079
1353	0.1127	33.0314	-83.109
1354	0.11105	33.0329	-83.11
1355	0.1136	33.0345	-83.1114
1356	0.11735	33.0357	-83.1129
1357	0.1178	33.0368	-83.1144
1358	0.1183	33.0395	-83.1157
1359	0.12175	33.041	-83.1157
1360	0.1245	33.0423	-83.1165
1361	0.12915	33.0441	-83.1182
1362	0.1267	33.0454	-83.1195
1363	0.13235	33.047	-83.1209
1364	0.13185	33.0487	-83.1218
1365	0.1313	33.0504	-83.1226
1366	0.13385	33.0521	-83.1234
1367	0.13425	33.0537	-83.1241
1368	0.13475	33.0555	-83.125
1369	0.13225	33.0569	-83.1264
1370	0.1343	33.0582	-83.1279
1371	0.1387	33.0596	-83.1294
1372	0.14435	33.0611	-83.1307
1373	0.1446	33.0627	-83.1317
1374	0.1497	33.0644	-83.1328
1375	0.15275	33.066	-83.1339
1376	0.15175	33.0676	-83.1346
1377	0.15325	33.0693	-83.1353
1378	0.1554	33.0708	-83.1361
1379	0.15755	33.0728	-83.1368
1380	0.1597	33.0744	-83.1377
1381	0.1578	33.0758	-83.1391
1382	0.1553	33.0773	-83.1405
1383	0.1571	33.0784	-83.1427
1384	0.1647	33.0793	-83.1456
1385	0.16545	33.0812	-83.1461
1386	0.16455	33.0835	-83.1464
1387	0.1656	33.0853	-83.1468
1388	0.16645	33.0867	-83.1472
1389	0.17215	33.0889	-83.1476
1390	0.1675	33.0911	-83.1474
1391	0.1643	33.0934	-83.1471
1392	0.1602	33.0957	-83.1474
1393	0.17455	33.0973	-83.1469
1394	0.1719	33.0993	-83.147
1395	0.1753	33.1018	-83.1467
1396	0.17395	33.1048	-83.1443
1397	0.1737	33.108	-83.1417
1398	0.18145	33.1106	-83.1404
1399	0.18225	33.1128	-83.1404
1400	0.1809	33.1148	-83.1403
1401	0.18075	33.1173	-83.1398
1402	0.18075	33.1197	-83.1388
1403	0.18075	33.1215	-83.1395
1404	0.1707	33.1227	-83.1412
1405	0.16945	33.1246	-83.1417
1406	0.1619	33.1261	-83.1432
1407	0.1588	33.1274	-83.1445
1408	0.1571	33.1287	-83.1465
1409	0.14795	33.1297	-83.1485
1410	0.14755	33.1309	-83.1505
1411	0.1442	33.1321	-83.1525
1412	0.14215	33.1318	-83.158
1413	0.1241	33.1308	-83.1652
1414	0.1385	33.1305	-83.1707
1415	0.12735	33.129	-83.179
1416	0.12565	33.1311	-83.1793
1417	0.13345	33.1337	-83.1777
1418	0.1372	33.1353	-83.1786
1419	0.1388	33.137	-83.1794
1420	0.13575	33.1389	-83.1802
1421	0.1304	33.1411	-83.18
1422	0.132	33.143	-83.18
1423	0.1325	33.1449	-83.1805
1424	0.13705	33.1465	-83.1817
1425	0.1337	33.1478	-83.1832
1426	0.1271	33.1497	-83.1839
1427	0.1207	33.1513	-83.1843
1428	0.1222	33.1602	-83.1832
1429	0.1341	33.1619	-83.1843
1430	0.13315	33.1655	-83.1808
1431	0.1242	33.1673	-83.1814
1432	0.12045	33.1692	-83.1816
1433	0.1266	33.1704	-83.1836
1434	0.1248	33.1718	-83.1851
1435	0.12595	33.1733	-83.1865
1436	0.1303	33.1748	-83.1877
1437	0.12085	33.1769	-83.1878
1438	0.11545	33.1791	-83.1874
1439	0.1261	33.1807	-83.1884
1440	0.1326	33.182	-83.1899
1441	0.13755	33.1835	-83.1915
1442	0.13765	33.1852	-83.192
1443	0.13645	33.1866	-83.1938
1444	0.1225	33.1885	-83.1941
1445	0.1334	33.1906	-83.1942
1446	0.1333	33.192	-83.1958
1447	0.1367	33.1928	-83.1984
1448	0.13275	33.1947	-83.199
1449	0.131	33.1965	-83.1994
1450	0.1235	33.1985	-83.1998
1451	0.11755	33.2004	-83.2001
1452	0.13515	33.2025	-83.2002
1453	0.1272	33.2046	-83.1999
1454	0.1207	33.2056	-83.2021
1455	0.1335	33.2081	-83.2061
1456	0.12405	33.2097	-83.2071
1457	0.1203	33.211	-83.2089
1458	0.1167	33.2124	-83.2103
1459	0.11425	33.214	-83.2113
1460	0.10805	33.2157	-83.2123
1461	0.1116	33.2174	-83.2131
1462	0.1455	33.2176	-83.217
1463	0.14285	33.2183	-83.2203
1464	0.14405	33.2198	-83.2221
1465	0.1503	33.2211	-83.2236
1466	0.1467	33.2227	-83.2248
1467	0.15085	33.224	-83.2262
1468	0.1339	33.2242	-83.2306
1469	0.131	33.2243	-83.2349
1470	0.1289	33.2247	-83.2389
1471	0.1278	33.2235	-83.2463
1472	0.1288	33.2242	-83.2497
1473	0.12635	33.2263	-83.2496
1474	0.1292	33.2287	-83.2488
1475	0.12345	33.2312	-83.2476
1476	0.12415	33.2339	-83.2464
1477	0.1221	33.2366	-83.2451
1478	0.1231	33.2393	-83.2439
1479	0.1257	33.2414	-83.2433
1480	0.14835	33.2431	-83.2439
1481	0.1409	33.244	-83.2468
1482	0.1196	33.2453	-83.2486
1483	0.1396	33.2477	-83.2484
1484	0.15785	33.2503	-83.2466
1485	0.1428	33.2515	-83.2487
1486	0.13385	33.2533	-83.2492
1487	0.13775	33.2547	-83.2508
1488	0.1318	33.2568	-83.2508
1489	0.11875	33.2638	-83.2489
1490	0.13065	33.2676	-83.2448
1491	0.14095	33.2716	-83.2404
1492	0.123	33.2729	-83.2421
1493	0.12535	33.2743	-83.2438
1494	0.1285	33.2761	-83.2446
1495	0.13385	33.2782	-83.2446
1496	0.1337	33.2802	-83.2443
1497	0.1421	33.2819	-83.2453
1498	0.1422	33.2843	-83.2447
1499	0.14795	33.2876	-83.2417
1500	0.1503	33.289	-83.2431
1501	0.1429	33.2898	-83.247
1502	0.13555	33.2899	-83.2505
1503	0.1162	33.2912	-83.2526
1504	0.11225	33.2926	-83.2539
1505	0.13515	33.2933	-83.2571
1506	0.0895	33.2947	-83.2587
1507	0.1358	33.2958	-83.2608
1508	0.1404	33.2972	-83.2623
1509	0.0921	33.2985	-83.2641
1510	0.14465	33.2995	-83.2669
1511	0.15385	33.2987	-83.2731
1512	0.15965	33.2991	-83.2773
1513	0.167	33.3001	-83.2793
1514	0.18605	33.2995	-83.2855
1515	0.1792	33.2994	-83.2903
1516	0.1731	33.3003	-83.2929
1517	0.1781	33.3012	-83.2957
1518	0.18175	33.3021	-83.2985
1519	0.1946	33.3033	-83.3004
1520	0.19805	33.3041	-83.3015
1521	0.1939	33.3072	-83.3009
1522	0.19495	33.3094	-83.3006
1523	0.1864	33.3116	-83.3002
1524	0.1773	33.3139	-83.2999
1525	0.1775	33.3163	-83.2992
1526	0.18	33.3187	-83.2984
1527	0.1733	33.321	-83.2975
1528	0.18155	33.3235	-83.2961
1529	0.17455	33.3263	-83.2949
1530	0.1625	33.3288	-83.294
1531	0.15855	33.3309	-83.2933
1532	0.1516	33.3338	-83.292
1533	0.15125	33.3365	-83.2907
1534	0.1513	33.3389	-83.29
1535	0.1529	33.3408	-83.2903
1536	0.1478	33.3442	-83.288
1537	0.1454	33.3475	-83.2845
1538	0.1516	33.3499	-83.2837
1539	0.1558	33.3524	-83.2829
1540	0.16235	33.3547	-83.2821
1541	0.17275	33.3574	-83.281
1542	0.1748	33.3589	-83.2817
1543	0.16925	33.3606	-83.2831
1544	0.16665	33.3615	-83.2853
1545	0.16805	33.3621	-83.2892
1546	0.17385	33.3632	-83.2908
1547	0.1793	33.366	-83.2896
1548	0.181	33.3686	-83.2879
1549	0.1748	33.3698	-83.2902
1550	0.17265	33.3708	-83.2926
1551	0.17715	33.3719	-83.2948
1552	0.1804	33.373	-83.2972
1553	0.1748	33.3741	-83.2994
1554	0.17365	33.375	-83.3018
1555	0.17555	33.3759	-83.3045
1556	0.1752	33.3765	-83.3076
1557	0.1705	33.3775	-83.3103
1558	0.17525	33.3785	-83.3132
1559	0.1723	33.3774	-83.3199
1560	0.16275	33.3793	-83.3205
1561	0.17195	33.3806	-83.322
1562	0.171	33.3821	-83.3238
1563	0.17685	33.3834	-83.3254
1564	0.17395	33.3848	-83.327
1565	0.1779	33.3862	-83.3286
1566	0.1796	33.3875	-83.3303
1567	0.1845	33.3888	-83.3319
1568	0.18985	33.3901	-83.3334
1569	0.18255	33.3915	-83.3351
1570	0.1866	33.3927	-83.3365
1571	0.19275	33.3939	-83.3388
1572	0.1868	33.3951	-83.3412
1573	0.1824	33.397	-83.341
1574	0.1827	33.3992	-83.341
1575	0.18115	33.4012	-83.3413
1576	0.1872	33.4031	-83.3415
1577	0.1843	33.4051	-83.3418
1578	0.1825	33.4069	-83.3425
1579	0.1754	33.4088	-83.3427
1580	0.1629	33.4108	-83.3432
1581	0.16175	33.4133	-83.342
1582	0.1677	33.4155	-83.3417
1583	0.1715	33.4172	-83.3419
1584	0.17515	33.4198	-83.3412
1585	0.16775	33.4241	-83.3363
1586	0.18565	33.4279	-83.3322
1587	0.1908	33.4301	-83.3319
1588	0.1879	33.4319	-83.3324
1589	0.1863	33.4337	-83.3332
1590	0.1729	33.4355	-83.3339
1591	0.18345	33.4371	-83.3359
1592	0.18935	33.4383	-83.3372
1593	0.1864	33.4395	-83.3385
1594	0.18785	33.4405	-83.3411
1595	0.1926	33.4415	-83.3453
1596	0.18645	33.4385	-83.3552
1597	0.18985	33.436	-83.3674
1598	0.20155	33.4339	-83.3748
1599	0.19685	33.4349	-83.3769
1600	0.2007	33.4359	-83.3798
1601	0.1957	33.4365	-83.3825
1602	0.1928	33.4371	-83.3855
1603	0.18895	33.438	-83.3885
1604	0.12415	33.4383	-83.3909
1605	0.19115	33.4396	-83.3939
1606	0.1913	33.4407	-83.3965
1607	0.18945	33.4417	-83.3986
1608	0.18595	33.4429	-83.4006
1609	0.1855	33.4442	-83.4026
1610	0.1913	33.4459	-83.4043
1611	0.1937	33.4469	-83.4056
1612	0.1928	33.4487	-83.4072
1613	0.194	33.4499	-83.4077
1614	0.188	33.4518	-83.4086
1615	0.19095	33.4532	-83.4093
1616	0.18995	33.4551	-83.4099
1617	0.1967	33.4576	-83.4109
1618	0.2037	33.4592	-83.4118
1619	0.20235	33.461	-83.4125
1620	0.2033	33.4628	-83.4135
1621	0.1958	33.4644	-83.4142
1622	0.2004	33.4662	-83.4153
1623	0.2018	33.4676	-83.4159
1624	0.20275	33.4693	-83.4171
1625	0.20545	33.4706	-83.4188
1626	0.20595	33.4717	-83.4212
1627	0.2054	33.4725	-83.4235
1628	0.2045	33.4736	-83.4266
1629	0.20495	33.4745	-83.4291
1630	0.20805	33.4752	-83.4308
1631	0.204	33.4768	-83.4325
1632	0.199	33.4782	-83.4332
1633	0.1975	33.4801	-83.4343
1634	0.19775	33.4815	-83.435
1635	0.1973	33.4834	-83.436
1636	0.1952	33.485	-83.4368
1637	0.1946	33.4872	-83.4372
1638	0.1939	33.4891	-83.4375
1639	0.1942	33.4914	-83.4378
1640	0.1957	33.4934	-83.4381
1641	0.19345	33.4951	-83.4384
1642	0.19515	33.4973	-83.4387
1643	0.1937	33.4989	-83.439
1644	0.1926	33.5007	-83.4404
1645	0.1934	33.502	-83.4416
1646	0.19405	33.5034	-83.443
1647	0.1938	33.5051	-83.4446
1648	0.19195	33.5063	-83.4458
1649	0.1944	33.5077	-83.4471
1650	0.1953	33.5099	-83.4481
1651	0.1926	33.5123	-83.4476
1652	0.19135	33.5146	-83.4468
1653	0.1919	33.5169	-83.446
1654	0.1986	33.52	-83.4449
1655	0.19925	33.5216	-83.4444
1656	0.1981	33.5235	-83.4441
1657	0.2011	33.5257	-83.4443
1658	0.2068	33.5278	-83.4442
1659	0.20865	33.5295	-83.4451
1660	0.2062	33.5308	-83.4469
1661	0.2054	33.5325	-83.4508
1662	0.1989	33.5336	-83.4537
1663	0.19655	33.5346	-83.4554
1664	0.20385	33.5365	-83.4581
1665	0.20485	33.5375	-83.4595
1666	0.2045	33.5393	-83.462
1667	0.2035	33.5408	-83.4641
1668	0.2024	33.5421	-83.4657
1669	0.1991	33.5434	-83.4675
1670	0.2016	33.5447	-83.4693
1671	0.20345	33.5461	-83.4708
1672	0.204	33.5477	-83.4717
1673	0.2058	33.5488	-83.4724
1674	0.206	33.5497	-83.4729
1675	0.20885	33.5511	-83.4734
1676	0.2084	33.5528	-83.474
1677	0.2099	33.5571	-83.4754
1678	0.20925	33.5584	-83.4762
1679	0.2093	33.5602	-83.4775
1680	0.2087	33.5612	-83.4781
1681	0.2079	33.5622	-83.4786
1682	0.2068	33.5651	-83.4784
1683	0.20495	33.567	-83.4782
1684	0.2049	33.5689	-83.4779
1685	0.20675	33.5705	-83.4777
1686	0.21015	33.5727	-83.4775
1687	0.2133	33.575	-83.4772
1688	0.21525	33.5764	-83.4773
1689	0.2193	33.5786	-83.4776
1690	0.21905	33.5813	-83.4775
1691	0.2251	33.5837	-83.4777
1692	0.2195	33.5855	-83.4777
1693	0.21075	33.5889	-83.4751
1694	0.21425	33.5928	-83.4711
1695	0.2093	33.5962	-83.4691
1696	0.2037	33.5979	-83.4711
1697	0.2004	33.5985	-83.4714
1698	0.19625	33.5997	-83.4731
1699	0.19525	33.6007	-83.4737
1700	0.1988	33.6033	-83.4752
1701	0.1894	33.6049	-83.4758
1702	0.18485	33.6066	-83.4768
1703	0.18035	33.6084	-83.4777
1704	0.17555	33.6101	-83.4785
1705	0.1846	33.6118	-83.4793
1706	0.1849	33.613	-83.4798
1707	0.18805	33.6153	-83.4809
1708	0.1866	33.6171	-83.4814
1709	0.18055	33.6188	-83.4819
1710	0.178	33.6207	-83.4826
1711	0.1777	33.6225	-83.4833
1712	0.1822	33.6239	-83.4838
1713	0.18175	33.6248	-83.484
1714	0.18035	33.6269	-83.4847
1715	0.1821	33.6297	-83.4858
1716	0.173	33.6313	-83.4866
1717	0.16405	33.633	-83.4876
1718	0.1607	33.6347	-83.4886
1719	0.1593	33.6363	-83.4896
1720	0.1604	33.6379	-83.4906
1721	0.1617	33.6395	-83.4917
1722	0.1664	33.6411	-83.4928
1723	0.1702	33.6427	-83.4938
1724	0.17765	33.6443	-83.4949
1725	0.18305	33.6459	-83.4959
1726	0.1958	33.6474	-83.4969
1727	0.20565	33.6495	-83.4975
1728	0.21145	33.6515	-83.4975
1729	0.21325	33.6536	-83.4972
1730	0.21825	33.6557	-83.4974
1731	0.21485	33.6578	-83.4972
1732	0.21445	33.6595	-83.4972
1733	0.21315	33.6618	-83.4972
1734	0.2093	33.6642	-83.4968
1735	0.2052	33.6662	-83.4971
1736	0.19475	33.6682	-83.4973
1737	0.189	33.67	-83.4977
1738	0.18035	33.672	-83.498
1739	0.182	33.674	-83.4984
1740	0.19055	33.6756	-83.4986
1741	0.1971	33.6772	-83.4989
1742	0.20565	33.6793	-83.499
1743	0.21105	33.6812	-83.4995
1744	0.2189	33.6831	-83.4998
1745	0.2097	33.685	-83.5011
1746	0.2092	33.6866	-83.5022
1747	0.2144	33.6882	-83.5033
1748	0.19215	33.6902	-83.5042
1749	0.1829	33.6915	-83.5046
1750	0.18005	33.6936	-83.5049
1751	0.18315	33.6949	-83.5049
1752	0.198	33.6976	-83.5044
1753	0.2029	33.7003	-83.5032
1754	0.2112	33.7029	-83.5021
1755	0.21075	33.7062	-83.5007
1756	0.2132	33.7087	-83.4996
1757	0.21205	33.7112	-83.4985
1758	0.2034	33.7138	-83.4977
1759	0.2038	33.7163	-83.4975
1760	0.20435	33.7184	-83.4976
1761	0.19925	33.7201	-83.4981
1762	0.22485	33.7224	-83.499
1763	0.22645	33.7242	-83.5
1764	0.2244	33.7257	-83.5012
1765	0.2232	33.7269	-83.5024
1766	0.2305	33.7282	-83.5038
1767	0.2354	33.7294	-83.5052
1768	0.224	33.7307	-83.5065
1769	0.22505	33.7321	-83.5083
1770	0.22935	33.7334	-83.5097
1771	0.2324	33.7347	-83.511
1772	0.23375	33.7359	-83.5125
1773	0.2333	33.7378	-83.5153
1774	0.2317	33.7387	-83.5166
1775	0.23055	33.7399	-83.5182
1776	0.2339	33.7416	-83.5202
1777	0.2325	33.7428	-83.5217
1778	0.23	33.7437	-83.5228
1779	0.2334	33.7455	-83.5247
1780	0.22915	33.7467	-83.5262
1781	0.2303	33.7482	-83.5282
1782	0.2289	33.7488	-83.5289
1783	0.221	33.7505	-83.5309
1784	0.22325	33.7523	-83.5329
1785	0.21355	33.7535	-83.5345
1786	0.2373	33.755	-83.5361
1787	0.2319	33.7558	-83.5373
1788	0.2313	33.7575	-83.5393
1789	0.2322	33.759	-83.5412
1790	0.23675	33.7601	-83.5434
1791	0.2417	33.7607	-83.5476
1792	0.24055	33.7606	-83.5501
1793	0.2404	33.7601	-83.5575
1794	0.2425	33.7598	-83.5616
1795	0.2472	33.7602	-83.5655
1796	0.24255	33.7613	-83.5677
1797	0.24505	33.7632	-83.5689
1798	0.24425	33.7648	-83.5699
1799	0.24065	33.7661	-83.5708
1800	0.2407	33.7679	-83.5721
1801	0.2434	33.7693	-83.5731
1802	0.2461	33.7708	-83.5741
1803	0.2444	33.7733	-83.5735
1804	0.23845	33.7749	-83.5747
1805	0.2348	33.7767	-83.5758
1806	0.2331	33.7781	-83.5768
1807	0.22785	33.7793	-83.5776
1808	0.22305	33.7814	-83.5788
1809	0.22545	33.7828	-83.5797
1810	0.23225	33.7847	-83.581
1811	0.2348	33.7859	-83.5818
1812	0.24175	33.7879	-83.583
1813	0.2446	33.7893	-83.584
1814	0.2494	33.7911	-83.5853
1815	0.2487	33.7923	-83.5861
1816	0.24315	33.7941	-83.5876
1817	0.2455	33.7949	-83.5907
1818	0.24055	33.7966	-83.5904
1819	0.23595	33.8002	-83.5883
1820	0.2315	33.803	-83.5867
1821	0.23045	33.8054	-83.5854
1822	0.2205	33.8071	-83.5866
1823	0.2233	33.8084	-83.5875
1824	0.2245	33.8101	-83.5888
1825	0.22975	33.8116	-83.5896
1826	0.2339	33.8136	-83.5899
1827	0.23765	33.8144	-83.5935
1828	0.24475	33.8162	-83.5937
1829	0.241	33.8177	-83.5944
1830	0.24755	33.8196	-83.5954
1831	0.2524	33.8209	-83.5962
1832	0.249	33.8228	-83.5974
1833	0.25145	33.8245	-83.5985
1834	0.25705	33.8259	-83.5994
1835	0.2513	33.8278	-83.6003
1836	0.246	33.8292	-83.6012
1837	0.2429	33.8309	-83.6022
1838	0.2419	33.833	-83.6036
1839	0.24185	33.8344	-83.6044
1840	0.2304	33.836	-83.6055
1841	0.23065	33.8378	-83.6069
1842	0.23205	33.8389	-83.6077
1843	0.22685	33.8403	-83.6089
1844	0.22655	33.8417	-83.6102
1845	0.22965	33.8433	-83.6117
1846	0.23465	33.8446	-83.613
1847	0.2392	33.8461	-83.6141
1848	0.23875	33.8474	-83.6151
1849	0.24625	33.8499	-83.6168
1850	0.25305	33.8514	-83.6181
1851	0.2446	33.8542	-83.6166
1852	0.2443	33.8589	-83.6114
1853	0.2435	33.8608	-83.6116
1854	0.24205	33.8617	-83.6123
1855	0.24185	33.8634	-83.6134
1856	0.23335	33.8654	-83.6146
1857	0.2326	33.8663	-83.6153
1858	0.2347	33.8678	-83.6163
1859	0.23495	33.8697	-83.6176
1860	0.2218	33.8715	-83.6188
1861	0.22125	33.873	-83.6197
1862	0.2266	33.8744	-83.6207
1863	0.227	33.8758	-83.6218
1864	0.23645	33.8773	-83.6246
1865	0.2367	33.8754	-83.6333
1866	0.2357	33.8768	-83.6348
1867	0.23515	33.8786	-83.6362
1868	0.2365	33.8802	-83.6372
1869	0.24405	33.8818	-83.6383
1870	0.2383	33.8836	-83.6394
1871	0.23945	33.885	-83.6403
1872	0.24145	33.8865	-83.6412
1873	0.2459	33.8883	-83.6423
1874	0.24895	33.8903	-83.6426
1875	0.2533	33.8925	-83.642
1876	0.2467	33.8944	-83.643
1877	0.25135	33.8961	-83.6439
1878	0.24605	33.8978	-83.6446
1879	0.23455	33.8979	-83.6489
1880	0.23695	33.8992	-83.6511
1881	0.23915	33.9005	-83.6522
1882	0.2502	33.9015	-83.6549
1883	0.2468	33.9031	-83.6559
1884	0.2411	33.9054	-83.6552
1885	0.22835	33.9114	-83.6475
1886	0.2488	33.914	-83.6452
1887	0.24545	33.9125	-83.6529
1888	0.25255	33.9174	-83.6469
1889	0.2462	33.9192	-83.6478
1890	0.2526	33.9208	-83.649
1891	0.25695	33.9227	-83.6493
1892	0.2587	33.9247	-83.6497
1893	0.2647	33.9269	-83.65
1894	0.26685	33.928	-83.651
1895	0.25725	33.9285	-83.6553
1896	0.2547	33.929	-83.6578
1897	0.24605	33.9296	-83.6614
1898	0.2547	33.9312	-83.6626
1899	0.2598	33.9331	-83.6636
1900	0.2664	33.9349	-83.6639
1901	0.27145	33.9374	-83.663
1902	0.26945	33.9404	-83.6607
1903	0.25165	33.9389	-83.6686
1904	0.2376	33.9393	-83.6725
1905	0.23435	33.94	-83.6759
1906	0.25265	33.9406	-83.6793
1907	0.25715	33.9419	-83.6805
1908	0.26115	33.9434	-83.6823
1909	0.2619	33.9445	-83.684
1910	0.27315	33.946	-83.6857
1911	0.26315	33.9476	-83.6871
1912	0.26615	33.949	-83.6883
1913	0.27825	33.9511	-83.6883
1914	0.26705	33.9535	-83.6875
1915	0.27545	33.9564	-83.6855
1916	0.2787	33.9596	-83.6823
1917	0.28875	33.9633	-83.6795
1918	0.2838	33.9653	-83.6792
1919	0.28655	33.9669	-83.6807
1920	0.28715	33.9681	-83.6825
1921	0.2859	33.9694	-83.6842
1922	0.29285	33.9706	-83.6863
1923	0.28585	33.9716	-83.6885
1924	0.28555	33.9735	-83.6893
1925	0.284	33.9748	-83.6911
1926	0.2887	33.9757	-83.6935
1927	0.28875	33.9771	-83.6953
1928	0.28915	33.9781	-83.6975
1929	0.29985	33.9794	-83.6997
1930	0.29535	33.9807	-83.6993
1931	0.2742	33.984	-83.6975
1932	0.2705	33.9841	-83.6999
1933	0.27715	33.9872	-83.7019
1934	0.2862	33.9877	-83.7037
1935	0.29555	33.989	-83.7053
1936	0.2882	33.9905	-83.707
1937	0.2984	33.9926	-83.7071
1938	0.29925	33.9948	-83.7075
1939	0.29435	33.9963	-83.7083
1940	0.29995	33.9983	-83.7084
1941	0.2976	33.9995	-83.7104
1942	0.29505	34.0009	-83.7119
1943	0.2992	34.0024	-83.7128
1944	0.30595	34.0048	-83.7119
1945	0.2979	34.0063	-83.7138
1946	0.2995	34.0079	-83.7148
1947	0.29355	34.0095	-83.7162
1948	0.28215	34.0103	-83.7182
1949	0.2707	34.0118	-83.7201
1950	0.26765	34.0119	-83.7246
1951	0.25855	34.0136	-83.725
1952	0.2544	34.0154	-83.7255
1953	0.26055	34.0173	-83.7267
1954	0.2661	34.0186	-83.7283
1955	0.2751	34.02	-83.7297
1956	0.2782	34.0213	-83.7309
1957	0.2865	34.0222	-83.734
1958	0.2923	34.0232	-83.7363
1959	0.2936	34.0244	-83.7386
1960	0.29495	34.0255	-83.7405
1961	0.29065	34.0293	-83.7337
1962	0.2806	34.0329	-83.7338
1963	0.25825	34.0363	-83.7329
1964	0.2602	34.0377	-83.7326
1965	0.25845	34.0395	-83.733
1966	0.24695	34.0419	-83.7319
1967	0.2516	34.0459	-83.7272
1968	0.24215	34.0491	-83.7251
1969	0.23445	34.0508	-83.7256
1970	0.23325	34.0527	-83.7263
1971	0.2432	34.0541	-83.7275
1972	0.2457	34.0553	-83.7296
1973	0.2489	34.0564	-83.732
1974	0.25675	34.0573	-83.7344
1975	0.26125	34.0579	-83.7374
1976	0.27515	34.0575	-83.744
1977	0.2817	34.0546	-83.7545
1978	0.29645	34.0554	-83.7575
1979	0.28005	34.0575	-83.7573
1980	0.28075	34.0592	-83.7567
1981	0.27145	34.0616	-83.7576
1982	0.26	34.0632	-83.7587
1983	0.2593	34.0643	-83.7602

## Sheet: Line2_ArrivalPicks
Shot Number	Instrument Number	Arrival Type	Distance (km)	Pick Time (s)	Pick Uncertainty (s)
7	1223	1	159.106	1.2733	0.1
7	1222	1	159.304	1.2106	0.1
7	1221	1	159.467	1.1735	0.1
7	1220	1	159.585	1.1412	0.1
7	1219	1	159.711	1.1218	0.1
7	1218	1	159.831	1.1109	0.1
7	1217	1	159.967	1.0759	0.1
7	1216	1	160.044	1.058	0.1
7	1215	1	160.158	1.0123	0.1
7	1214	1	160.249	1.0033	0.1
7	1213	1	160.329	0.989	0.1
7	1212	1	160.382	0.9718	0.1
7	1211	1	160.417	0.9734	0.1
7	1209	1	165.728	0.7638	0.1
7	1208	1	165.84	0.9478	0.1
7	1207	1	165.914	0.935	0.1
7	1206	1	166.05	0.9458	0.1
7	1205	1	166.191	0.9635	0.1
7	1203	1	166.597	0.998	0.1
7	1202	1	166.799	1.0361	0.1
7	1200	1	167.25	1.1458	0.1
7	1198	1	167.688	1.2495	0.1
8	1163	1	171.051	1.0648	0.1
8	1162	1	171.425	0.9831	0.1
8	1161	1	171.734	0.9114	0.1
8	1160	1	171.989	0.8823	0.1
8	1159	1	172.246	0.8266	0.1
8	1158	1	172.496	0.7861	0.1
8	1157	1	172.741	0.7303	0.1
8	1156	1	172.984	0.6423	0.1
8	1155	1	173.15	0.5623	0.1
8	1152	1	175.059	0.6079	0.1
8	1151	1	175.196	0.6472	0.1
8	1150	1	175.325	0.6912	0.1
8	1149	1	175.496	0.7724	0.1
8	1148	1	175.685	0.8015	0.1
8	1147	1	175.904	0.8311	0.1
8	1146	1	176.153	0.9007	0.1
8	1145	1	176.364	0.9682	0.1
8	1144	1	176.572	1.0042	0.1
10	954	1	214.243	1.1325	0.1
10	953	1	214.289	1.1156	0.1
10	950	1	214.359	1.0817	0.1
10	951	1	214.39	1.07	0.1
10	949	1	214.401	1.0733	0.1
10	941	1	214.482	1.0218	0.1
10	948	1	214.561	0.9872	0.1
10	940	1	214.616	0.9674	0.1
10	947	1	214.669	0.9458	0.1
10	939	1	214.685	0.9448	0.1
10	938	1	214.744	0.9186	0.1
10	942	1	214.783	0.902	0.1
10	937	1	214.803	0.8869	0.1
10	936	1	214.814	0.8847	0.1
10	946	1	214.823	0.8929	0.1
10	943	1	214.841	0.8786	0.1
10	945	1	214.851	0.8776	0.1
10	944	1	214.877	0.8676	0.1
10	935	1	218.919	0.8378	0.1
10	934	1	219.029	0.8807	0.1
10	933	1	219.25	0.9956	0.1
10	932	1	219.466	1.0786	0.1
10	931	1	219.689	1.1739	0.1
2	1837	3	33.103	0.9245	0.05
2	1836	3	33.274	0.8881	0.05
2	1835	3	33.426	0.8658	0.05
2	1834	3	33.597	0.8233	0.05
2	1833	3	33.735	0.7951	0.05
2	1832	3	33.903	0.7642	0.05
2	1831	3	34.084	0.7575	0.05
2	1830	3	34.204	0.7098	0.05
2	1829	3	34.361	0.6877	0.05
2	1828	3	34.47	0.6659	0.05
2	1827	3	34.528	0.6509	0.05
2	1826	3	34.872	0.602	0.05
2	1825	3	34.938	0.6039	0.05
2	1824	3	35.024	0.5887	0.05
2	1823	3	35.151	0.5591	0.05
2	1822	3	35.226	0.5324	0.05
2	1821	3	40.569	0.5084	0.05
2	1820	3	40.734	0.5489	0.05
2	1819	3	40.963	0.5973	0.05
2	1814	3	41.175	0.6208	0.05
2	1813	3	41.21	0.6161	0.05
2	1811	3	41.324	0.6306	0.05
2	1809	3	41.463	0.6319	0.05
2	1808	3	41.545	0.6435	0.05
2	1807	3	41.689	0.6878	0.05
2	1806	3	41.764	0.7094	0.05
2	1805	3	41.86	0.7201	0.05
2	1804	3	41.998	0.7494	0.05
2	1803	3	42.127	0.7804	0.05
2	1802	3	42.405	0.8141	0.05
2	1801	3	42.528	0.8219	0.05
2	1800	3	42.651	0.8539	0.05
2	1799	3	42.809	0.8863	0.05
2	1798	3	42.926	0.8892	0.05
3	1773	3	46.685	0.9036	0.05
3	1772	3	46.989	0.8609	0.05
3	1771	3	47.161	0.8385	0.05
3	1770	3	47.342	0.7945	0.05
3	1769	3	47.515	0.7477	0.05
3	1768	3	47.712	0.7335	0.05
3	1767	3	47.897	0.695	0.05
3	1766	3	48.059	0.66	0.05
3	1765	3	48.229	0.6338	0.05
3	1764	3	48.388	0.5973	0.05
3	1763	3	48.569	0.5674	0.05
3	1762	3	48.778	0.5272	0.05
3	1761	3	49.051	0.4751	0.05
3	1760	3	49.237	0.4506	0.05
3	1759	3	49.469	0.3987	0.05
3	1758	3	49.738	0.3634	0.05
3	1757	3	50.003	0.3327	0.05
3	1756	3	50.226	0.2944	0.05
3	1755	3	50.42	0.2333	0.05
3	1754	3	50.597	0.202	0.05
3	1753	3	52.496	0.2082	0.05
3	1752	3	52.56	0.208	0.05
3	1751	3	52.655	0.2135	0.05
3	1750	3	52.7	0.2204	0.05
3	1749	3	52.787	0.2409	0.05
3	1748	3	52.848	0.2513	0.05
3	1747	3	52.946	0.2724	0.05
3	1746	3	53.024	0.2723	0.05
3	1745	3	53.128	0.3024	0.05
3	1744	3	53.28	0.3439	0.05
3	1743	3	53.478	0.3643	0.05
3	1742	3	53.66	0.4044	0.05
3	1741	3	53.885	0.434	0.05
3	1740	3	54.055	0.4511	0.05
3	1738	3	54.441	0.5427	0.05
3	1737	3	54.654	0.5674	0.05
3	1736	3	54.858	0.5978	0.05
3	1735	3	55.068	0.6472	0.05
3	1734	3	55.296	0.6773	0.05
3	1733	3	55.556	0.7425	0.05
3	1732	3	55.816	0.7603	0.05
3	1731	3	56.003	0.8052	0.05
3	1730	3	56.232	0.8394	0.05
3	1729	3	56.461	0.8474	0.05
4	1632	3	74.82	0.9183	0.05
4	1631	3	74.973	0.9109	0.05
4	1630	3	75.206	0.8771	0.05
4	1629	3	75.383	0.8398	0.05
4	1628	3	75.623	0.7928	0.05
4	1627	3	75.915	0.7499	0.05
4	1626	3	76.139	0.7074	0.05
4	1625	3	76.393	0.6622	0.05
4	1624	3	76.604	0.6217	0.05
4	1623	3	76.816	0.5931	0.05
4	1622	3	76.957	0.5654	0.05
4	1621	3	77.163	0.5236	0.05
4	1620	3	77.316	0.494	0.05
4	1619	3	77.503	0.4512	0.05
4	1618	3	77.665	0.4222	0.05
4	1617	3	77.814	0.4114	0.05
4	1615	3	78.113	0.3422	0.05
4	1614	3	78.193	0.3128	0.05
4	1613	3	78.284	0.3219	0.05
4	1612	3	78.326	0.3074	0.05
4	1611	3	78.426	0.29	0.05
4	1610	3	78.495	0.2683	0.05
4	1609	3	78.542	0.2732	0.05
4	1608	3	78.578	0.2616	0.05
4	1607	3	80.831	0.2434	0.05
4	1605	3	80.915	0.2714	0.05
4	1604	3	81.064	0.3014	0.05
4	1603	3	81.135	0.3093	0.05
4	1602	3	81.32	0.3499	0.05
4	1601	3	81.509	0.383	0.05
4	1600	3	81.702	0.4248	0.05
4	1599	3	81.957	0.4801	0.05
4	1598	3	82.164	0.516	0.05
4	1597	3	82.533	0.5506	0.05
4	1596	3	83.415	0.7044	0.05
4	1595	3	84.199	0.827	0.05
4	1594	3	84.603	0.8852	0.05
5	1540	3	93.105	0.8601	0.05
5	1539	3	93.376	0.8215	0.05
5	1538	3	93.661	0.7423	0.05
5	1537	3	93.94	0.6944	0.05
5	1536	3	94.346	0.6632	0.05
5	1535	3	94.733	0.5976	0.05
5	1534	3	94.945	0.565	0.05
5	1533	3	95.216	0.5273	0.05
5	1531	3	95.831	0.3924	0.05
5	1530	3	96.055	0.3579	0.05
5	1529	3	96.318	0.3336	0.05
5	1528	3	96.583	0.2767	0.05
5	1527	3	96.778	0.2477	0.05
5	1526	3	96.94	0.2147	0.05
5	1525	3	97.048	0.2021	0.05
5	1523	3	98.672	0.1708	0.05
5	1522	3	98.773	0.2035	0.05
5	1521	3	98.919	0.2371	0.05
5	1515	3	99.328	0.2967	0.05
5	1514	3	99.422	0.3515	0.05
5	1513	3	99.663	0.3583	0.05
5	1512	3	99.869	0.4162	0.05
5	1511	3	100.174	0.4813	0.05
5	1509	3	100.862	0.575	0.05
5	1507	3	101.286	0.6765	0.05
5	1505	3	101.726	0.7241	0.05
5	1504	3	102.02	0.7451	0.05
5	1503	3	102.21	0.7985	0.05
5	1502	3	102.446	0.8328	0.05
5	1501	3	102.725	0.8818	0.05
6	1414	3	120.426	0.8879	0.05
6	1413	3	120.897	0.8134	0.05
6	1412	3	121.451	0.7141	0.05
6	1411	3	121.88	0.632	0.05
6	1410	3	122.103	0.5856	0.05
6	1409	3	122.331	0.5545	0.05
6	1408	3	122.548	0.5171	0.05
6	1407	3	122.785	0.4726	0.05
6	1406	3	122.969	0.4282	0.05
6	1405	3	123.175	0.4166	0.05
6	1404	3	123.308	0.38	0.05
6	1403	3	123.51	0.3449	0.05
6	1402	3	126.544	0.3235	0.05
6	1401	3	126.584	0.3408	0.05
6	1400	3	126.633	0.3423	0.05
6	1399	3	126.676	0.3569	0.05
6	1398	3	126.748	0.369	0.05
6	1396	3	127.368	0.4664	0.05
6	1395	3	127.738	0.5435	0.05
6	1394	3	127.939	0.5724	0.05
6	1393	3	128.086	0.595	0.05
6	1392	3	128.238	0.6023	0.05
6	1391	3	128.409	0.6246	0.05
6	1388	3	129.001	0.7277	0.05
6	1386	3	129.262	0.7921	0.05
6	1385	3	129.468	0.8197	0.05
6	1382	3	129.656	0.8426	0.05
6	1381	3	129.773	0.8626	0.05
6	1380	3	129.886	0.88	0.05
6	1379	3	130.027	0.9178	0.05
7	1254	2	154.653	2.0442	0.1
7	1253	2	154.853	2.0199	0.1
7	1252	2	155.074	1.9758	0.1
7	1251	2	155.323	1.9583	0.1
7	1250	2	155.551	1.8824	0.1
7	1249	2	155.785	1.8884	0.1
7	1248	2	156.036	1.8553	0.1
7	1247	2	156.216	1.8001	0.1
7	1246	2	156.422	1.7644	0.1
7	1245	2	156.6	1.7249	0.1
7	1244	2	156.71	1.703	0.1
7	1243	2	156.804	1.672	0.1
7	1242	2	156.941	1.6642	0.1
7	1241	2	157.106	1.6024	0.1
7	1240	2	157.292	1.5686	0.1
7	1239	2	157.42	1.5704	0.1
7	1238	2	157.478	1.555	0.1
7	1237	2	157.529	1.5537	0.1
7	1236	2	157.563	1.5512	0.1
7	1235	2	157.73	1.5065	0.1
7	1234	2	157.837	1.4853	0.1
7	1233	2	157.931	1.4795	0.1
7	1232	2	158.009	1.4747	0.1
7	1231	2	158.177	1.4399	0.1
7	1230	2	158.252	1.4308	0.1
7	1229	2	158.352	1.4237	0.1
7	1226	2	158.668	1.3333	0.1
7	1227	2	158.67	1.3329	0.1
7	1225	2	158.757	1.3337	0.1
7	1224	2	158.921	1.3048	0.1
7	1223	2	159.106	1.2763	0.1
7	1197	2	168.04	1.3772	0.1
7	1196	2	168.451	1.4888	0.1
7	1195	2	168.837	1.5709	0.1
7	1194	2	169.35	1.6615	0.1
7	1193	2	169.739	1.7354	0.1
7	1192	2	170.026	1.7955	0.1
7	1191	2	170.293	1.8495	0.1
8	1185	2	167.103	1.8014	0.1
8	1184	2	167.332	1.7541	0.1
8	1183	2	167.504	1.7255	0.1
8	1182	2	167.72	1.6936	0.1
8	1181	2	167.898	1.645	0.1
8	1180	2	168.081	1.6229	0.1
8	1179	2	168.298	1.5617	0.1
8	1178	2	168.507	1.5187	0.1
8	1177	2	168.715	1.4699	0.1
8	1176	2	168.895	1.4442	0.1
8	1175	2	169.041	1.4112	0.1
8	1174	2	169.215	1.3864	0.1
8	1173	2	169.386	1.3055	0.1
8	1172	2	169.541	1.3106	0.1
8	1171	2	169.658	1.315	0.1
8	1170	2	169.762	1.2991	0.1
8	1169	2	169.863	1.2837	0.1
8	1168	2	169.948	1.2595	0.1
8	1167	2	170.026	1.2221	0.1
8	1166	2	170.167	1.2358	0.1
8	1165	2	170.386	1.1943	0.1
8	1164	2	170.644	1.1532	0.1
8	1145	2	176.364	0.9734	0.1
8	1144	2	176.572	1.0114	0.1
8	1143	2	176.772	1.0586	0.1
8	1142	2	176.967	1.0904	0.1
8	1141	2	177.168	1.1145	0.1
8	1140	2	177.359	1.1652	0.1
8	1139	2	177.545	1.2042	0.1
8	1138	2	177.697	1.2239	0.1
8	1137	2	177.792	1.2267	0.1
8	1133	2	178.322	1.2895	0.1
8	1132	2	178.506	1.3198	0.1
8	1131	2	178.691	1.3764	0.1
8	1130	2	178.862	1.415	0.1
8	1128	2	179.279	1.4856	0.1
8	1127	2	179.537	1.5559	0.1
8	1126	2	179.792	1.5853	0.1
8	1125	2	180.029	1.6273	0.1
8	1124	2	180.252	1.6557	0.1
8	1123	2	180.488	1.7083	0.1
8	1122	2	180.73	1.7621	0.1
8	1121	2	180.979	1.8173	0.1
8	1118	2	181.577	1.9567	0.1
8	1117	2	181.776	2.0217	0.1
8	1116	2	181.983	2.0667	0.1
8	1115	2	182.194	2.1197	0.1
8	1114	2	182.406	2.1513	0.1
8	1113	2	182.607	2.1987	0.1
8	1112	2	182.799	2.2371	0.1
12	658	2	274.652	1.6714	0.04
12	657	2	274.904	1.5969	0.04
12	656	2	275.107	1.5319	0.04
12	655	2	275.269	1.4831	0.04
12	654	2	275.453	1.4423	0.04
12	653	2	275.63	1.3745	0.04
12	652	2	275.772	1.3373	0.04
12	651	2	275.909	1.2813	0.04
12	650	2	276.042	1.2503	0.04
12	649	2	282.96	1.2101	0.04
12	648	2	282.985	1.22	0.04
12	647	2	283.199	1.2806	0.04
12	646	2	283.434	1.3461	0.04
12	645	2	283.934	1.4901	0.04
12	640	2	284.215	1.569	0.04
12	641	2	284.261	1.5739	0.04
12	639	2	284.3	1.5888	0.04
12	624	2	284.494	1.6631	0.04
12	625	2	284.508	1.6659	0.04
12	626	2	284.529	1.6701	0.04
12	629	2	284.638	1.6924	0.04
12	637	2	284.693	1.7075	0.04
12	622	2	284.719	1.7232	0.04
13	530	2	302.687	1.8155	0.04
13	529	2	302.893	1.7221	0.04
13	528	2	303.089	1.6704	0.04
13	527	2	303.303	1.6186	0.04
13	526	2	303.568	1.5386	0.04
13	525	2	303.656	1.5192	0.04
13	524	2	303.883	1.4576	0.04
13	523	2	304.073	1.4142	0.04
13	522	2	304.286	1.3572	0.04
13	521	2	304.497	1.2952	0.04
13	520	2	304.711	1.2398	0.04
13	519	2	304.92	1.1836	0.04
13	518	2	305.107	1.1337	0.04
13	517	2	305.278	1.0869	0.04
13	516	2	305.446	1.0479	0.04
13	515	2	305.664	0.9863	0.04
13	514	2	305.789	0.9577	0.04
13	513	2	306.014	0.8947	0.04
13	512	2	306.201	0.8465	0.04
13	511	2	306.481	0.7833	0.04
13	510	2	306.68	0.7183	0.04
13	509	2	306.923	0.6589	0.04
13	508	2	307.144	0.5986	0.04
13	507	2	307.335	0.5478	0.04
13	506	2	307.53	0.4944	0.04
13	505	2	307.78	0.4156	0.04
13	504	2	309.148	0.363	0.04
13	503	2	309.324	0.4342	0.04
13	502	2	309.435	0.4798	0.04
13	501	2	309.573	0.5164	0.04
13	500	2	309.815	0.5774	0.04
13	499	2	309.928	0.6018	0.04
13	498	2	310.138	0.6564	0.04
13	497	2	310.326	0.6958	0.04
13	496	2	310.654	0.7919	0.04
13	495	2	310.741	0.8183	0.04
13	494	2	311.185	0.9467	0.04
13	493	2	311.244	0.9621	0.04
13	492	2	311.376	0.9921	0.04
13	491	2	311.531	1.0285	0.04
13	490	2	311.685	1.0755	0.04
13	489	2	311.862	1.1199	0.04
13	488	2	312.054	1.1691	0.04
13	487	2	312.258	1.2296	0.04
13	486	2	312.459	1.2842	0.04
13	485	2	312.669	1.337	0.04
13	484	2	312.862	1.3882	0.04
13	483	2	313.058	1.4436	0.04
13	482	2	313.268	1.4982	0.04
13	481	2	313.467	1.5506	0.04
13	480	2	313.678	1.609	0.04
13	479	2	313.878	1.6867	0.04
13	478	2	314.087	1.7357	0.04
14	412	2	325.511	1.9085	0.04
14	411	2	325.639	1.8757	0.04
14	410	2	325.923	1.8045	0.04
14	409	2	326.152	1.7472	0.04
14	408	2	326.322	1.7017	0.04
14	407	2	326.496	1.6568	0.04
14	406	2	326.792	1.5804	0.04
14	405	2	327.001	1.5314	0.04
14	404	2	327.347	1.4435	0.04
14	394	2	327.557	1.3943	0.04
14	403	2	327.626	1.3762	0.04
14	393	2	327.799	1.3329	0.04
14	402	2	327.88	1.3052	0.04
14	392	2	328.023	1.2723	0.04
14	396	2	328.061	1.2618	0.04
14	401	2	328.141	1.2343	0.04
14	397	2	328.175	1.2289	0.04
14	398	2	328.269	1.2087	0.04
14	399	2	328.339	1.1774	0.04
14	400	2	328.366	1.172	0.04
14	391	2	328.449	1.1612	0.04
14	390	2	329.007	1.0151	0.04
14	389	2	329.248	0.9553	0.04
14	388	2	329.479	0.9091	0.04
14	387	2	329.633	0.8611	0.04
14	386	2	329.718	0.8426	0.04
14	385	2	334.13	0.8205	0.04
14	384	2	334.355	0.8763	0.04
14	379	2	335.439	1.1659	0.04
14	380	2	335.482	1.181	0.04
14	378	2	335.559	1.2022	0.04
14	381	2	335.691	1.2444	0.04
14	382	2	335.751	1.2578	0.04
14	377	2	335.987	1.3209	0.04
14	376	2	336.024	1.3326	0.04
14	375	2	336.057	1.3449	0.04
14	374	2	336.106	1.349	0.04
14	373	2	336.148	1.3761	0.04
14	372	2	336.458	1.451	0.04
14	371	2	336.584	1.4791	0.04
14	370	2	336.734	1.5339	0.04
14	369	2	336.816	1.5403	0.04
14	368	2	336.936	1.5628	0.04
14	367	2	337.204	1.6423	0.04
14	366	2	337.348	1.6798	0.04
14	365	2	337.429	1.6974	0.04
14	364	2	337.648	1.7498	0.04
14	363	2	337.85	1.8075	0.04
14	362	2	338.058	1.8433	0.04
14	361	2	338.366	1.9208	0.04
15	307	2	349.026	2.1	0.04
15	306	2	349.237	2.052	0.04
15	305	2	349.444	2.0048	0.04
15	304	2	349.641	1.9352	0.04
15	303	2	349.849	1.8979	0.04
15	302	2	350.054	1.8526	0.04
15	301	2	350.261	1.7637	0.04
15	300	2	350.449	1.7247	0.04
15	298	2	350.78	1.6441	0.04
15	297	2	353.494	0.9236	0.04
15	296	2	353.526	0.9129	0.04
15	295	2	353.59	0.8972	0.04
15	294	2	353.658	0.8851	0.04
15	293	2	353.749	0.8654	0.04
15	287	2	353.836	0.8423	0.04
15	292	2	353.895	0.8233	0.04
15	288	2	353.904	0.82	0.04
15	286	2	353.935	0.8124	0.04
15	289	2	353.956	0.8082	0.04
15	290	2	353.982	0.8016	0.04
15	291	2	354.014	0.7894	0.04
15	285	2	354.213	0.7438	0.04
15	284	2	354.256	0.7252	0.04
15	283	2	354.274	0.7201	0.04
15	282	2	358.06	0.6953	0.04
15	281	2	358.068	0.6984	0.04
15	280	2	358.107	0.7134	0.04
15	279	2	358.208	0.7379	0.04
15	278	2	358.324	0.7712	0.04
15	277	2	358.411	0.7986	0.04
15	276	2	358.556	0.8319	0.04
15	275	2	358.632	0.8529	0.04
15	274	2	358.806	0.8963	0.04
15	273	2	358.942	0.935	0.04
15	272	2	359.074	0.973	0.04
15	271	2	359.207	1.0111	0.04
15	270	2	359.338	1.0416	0.04
15	269	2	359.507	1.084	0.04
15	268	2	359.706	1.1353	0.04
15	267	2	359.877	1.1911	0.04
15	266	2	360.023	1.2203	0.04
15	265	2	360.183	1.2667	0.04
15	264	2	360.394	1.319	0.04
15	263	2	360.523	1.3534	0.04
15	262	2	360.739	1.4167	0.04
15	261	2	360.923	1.4636	0.04
15	260	2	361.036	1.492	0.04
15	258	2	361.285	1.559	0.04
15	257	2	361.382	1.577	0.04
15	256	2	361.637	1.6366	0.04
15	255	2	361.787	1.6796	0.04
15	254	2	361.98	1.7355	0.04
15	253	2	362.115	1.7625	0.04
15	252	2	362.258	1.8112	0.04
15	250	2	362.415	1.8498	0.04
15	249	2	362.478	1.8725	0.04
17	119	2	390.496	2.1158	0.04
17	118	2	390.676	2.0741	0.04
17	117	2	390.862	2.0541	0.04
17	116	2	391.104	1.9913	0.04
17	115	2	391.312	1.9641	0.04
17	114	2	391.553	1.9102	0.04
17	113	2	391.76	1.8659	0.04
17	112	2	391.971	1.8208	0.04
17	111	2	392.187	1.7776	0.04
17	110	2	392.397	1.7212	0.04
17	109	2	392.605	1.6883	0.04
17	108	2	392.807	1.6363	0.04
17	107	2	392.992	1.5936	0.04
17	106	2	393.189	1.5571	0.04
17	105	2	393.378	1.5164	0.04
17	104	2	393.558	1.4718	0.04
17	103	2	393.745	1.4286	0.04
17	102	2	393.961	1.3825	0.04
17	101	2	394.198	1.3466	0.04
17	100	2	394.43	1.2916	0.04
17	99	2	394.637	1.2502	0.04
17	98	2	394.844	1.2059	0.04
17	97	2	395.051	1.1645	0.04
17	96	2	395.241	1.1323	0.04
17	95	2	395.45	1.0905	0.04
17	94	2	395.653	1.0441	0.04
17	93	2	395.815	1.0146	0.04
17	92	2	395.972	0.9832	0.04
17	91	2	396.133	0.9452	0.04
17	90	2	396.325	0.8925	0.04
17	89	2	396.524	0.8469	0.04
17	85	2	396.644	0.8143	0.04
17	87	2	396.773	0.7885	0.04
17	86	2	396.984	0.7434	0.04
17	83	2	397.2	0.6887	0.04
17	82	2	400.454	0.6542	0.04
17	81	2	400.535	0.6992	0.04
17	80	2	400.753	0.7543	0.04
17	79	2	400.952	0.8085	0.04
17	78	2	401.23	0.8727	0.04
17	77	2	401.472	0.9355	0.04
17	76	2	401.787	1.0129	0.04
17	75	2	401.965	1.0514	0.04
17	74	2	402.225	1.1034	0.04
17	73	2	402.53	1.1701	0.04
17	72	2	402.85	1.2514	0.04
17	71	2	403.375	1.3765	0.04
17	70	2	403.857	1.4845	0.04
17	69	2	404.758	1.7078	0.04
17	68	2	405.708	1.932	0.04
17	67	2	406.614	2.1385	0.04
17	66	2	407.184	2.2744	0.04
17	65	2	407.66	2.4013	0.04
17	64	2	408.129	2.4819	0.04
17	63	2	408.511	2.5637	0.04
17	62	2	408.92	2.6449	0.04
17	56	2	408.942	2.639	0.04
17	58	2	408.983	2.6607	0.04
17	52	2	408.987	2.6613	0.04
17	51	2	409.01	2.6555	0.04
17	50	2	409.068	2.6774	0.04
17	59	2	409.085	2.6843	0.04
17	48	2	409.154	2.7033	0.04
17	61	2	409.23	2.7098	0.04
17	46	2	409.305	2.7725	0.04
17	45	2	409.387	2.7819	0.04
17	44	2	409.472	2.8031	0.04
17	43	2	409.576	2.8202	0.04
17	42	2	409.687	2.8452	0.04
17	38	2	409.751	2.8656	0.04
17	39	2	409.776	2.8647	0.04
17	40	2	409.824	2.8715	0.04
17	41	2	409.838	2.8735	0.04
17	36	2	409.857	2.8876	0.04
17	35	2	409.972	2.9063	0.04
17	34	2	410.197	2.9702	0.04
17	33	2	410.323	3.0018	0.04
17	32	2	410.488	3.0253	0.04
17	31	2	410.694	3.0661	0.04
17	30	2	410.897	3.1291	0.04
17	29	2	411.141	3.1933	0.04
17	27	2	411.525	3.2346	0.04
17	26	2	411.713	3.2796	0.04
17	25	2	411.872	3.3295	0.04
17	24	2	412.15	3.3828	0.04
17	23	2	412.416	3.4389	0.04
17	22	2	412.561	3.4732	0.04
17	21	2	412.712	3.522	0.04
17	20	2	412.911	3.5595	0.04
17	19	2	413.178	3.6203	0.04
17	18	2	413.358	3.6506	0.04
17	17	2	413.565	3.6937	0.04
17	16	2	413.763	3.7402	0.04
17	15	2	413.954	3.7765	0.04
17	14	2	414.162	3.8198	0.04
17	13	2	414.388	3.8703	0.04
17	12	2	414.561	3.904	0.04
17	11	2	414.761	3.9326	0.04
17	10	2	415.01	3.9863	0.04
17	9	2	415.193	4.0261	0.04
17	8	2	415.417	4.0581	0.04
17	7	2	415.648	4.1137	0.04
17	6	2	415.86	4.135	0.04
17	5	2	416.118	4.1945	0.04
17	4	2	416.364	4.2251	0.04
17	3	2	416.523	4.2614	0.04
17	2	2	416.693	4.2993	0.04
17	1	2	416.852	4.3265	0.04
2	1981	3	4.314	5.6019	0.05
2	1980	3	4.576	5.5519	0.05
2	1979	3	4.705	5.546	0.05
2	1978	3	4.885	5.5506	0.05
2	1977	3	5.116	5.4974	0.05
2	1976	3	5.378	5.4549	0.05
2	1974	3	5.859	5.356	0.05
2	1973	3	6.054	5.3055	0.05
2	1972	3	6.268	5.2749	0.05
2	1971	3	6.484	5.2692	0.05
2	1970	3	6.672	5.2021	0.05
2	1969	3	6.889	5.1887	0.05
2	1968	3	7.075	5.1174	0.05
2	1967	3	7.285	5.1132	0.05
2	1966	3	7.434	5.092	0.05
2	1965	3	7.607	5.0597	0.05
2	1964	3	7.788	5.0338	0.05
2	1963	3	7.903	5.0275	0.05
2	1961	3	8.521	4.8836	0.05
2	1959	3	8.712	4.9157	0.05
2	1958	3	8.943	4.86	0.05
2	1957	3	9.152	4.8176	0.05
2	1956	3	9.394	4.8069	0.05
2	1955	3	9.574	4.7762	0.05
2	1954	3	9.782	4.7313	0.05
2	1953	3	9.987	4.692	0.05
2	1952	3	10.22	4.6612	0.05
2	1951	3	10.405	4.6247	0.05
2	1950	3	10.591	4.6007	0.05
2	1949	3	10.829	4.5389	0.05
2	1944	3	11.895	4.3867	0.05
2	1943	3	12.064	4.3625	0.05
2	1941	3	12.461	4.3083	0.05
2	1940	3	12.675	4.2576	0.05
2	1939	3	12.869	4.2274	0.05
2	1938	3	13.042	4.1976	0.05
2	1937	3	13.266	4.1631	0.05
2	1936	3	13.465	4.1422	0.05
2	1935	3	13.686	4.1157	0.05
2	1934	3	13.895	4.0783	0.05
2	1933	3	14.03	4.0665	0.05
2	1932	3	14.42	3.9831	0.05
2	1931	3	14.551	3.9669	0.05
2	1930	3	14.762	3.9317	0.05
2	1928	3	15.093	3.8819	0.05
2	1927	3	15.299	3.85	0.05
2	1926	3	15.527	3.8149	0.05
2	1915	3	17.704	3.4586	0.05
2	1914	3	17.848	3.438	0.05
2	1913	3	18.016	3.4216	0.05
2	1912	3	18.202	3.3673	0.05
2	1911	3	18.388	3.3457	0.05
2	1910	3	18.613	3.3161	0.05
2	1909	3	18.839	3.2914	0.05
2	1908	3	19.03	3.2666	0.05
2	1891	3	22.685	2.6412	0.05
2	1890	3	22.872	2.6145	0.05
2	1889	3	23.079	2.5874	0.05
2	1888	3	23.288	2.5576	0.05
2	1886	3	23.693	2.477	0.05
2	1885	3	23.801	2.444	0.05
2	1884	3	23.885	2.4572	0.05
2	1883	3	24.038	2.4353	0.05
2	1882	3	24.232	2.4026	0.05
2	1878	3	25.162	2.2521	0.05
2	1877	3	25.347	2.2181	0.05
2	1876	3	25.548	2.1869	0.05
2	1875	3	25.766	2.1582	0.05
2	1874	3	25.92	2.1362	0.05
2	1873	3	26.099	2.093	0.05
2	1872	3	26.316	2.0595	0.05
2	1871	3	26.491	2.0396	0.05
2	1870	3	26.667	1.9968	0.05
2	1869	3	26.883	1.9533	0.05
2	1868	3	27.079	1.9203	0.05
2	1867	3	27.281	1.8965	0.05
2	1866	3	27.512	1.8534	0.05
2	1865	3	27.718	1.824	0.05
2	1864	3	28.091	1.7606	0.05
2	1863	3	28.38	1.6992	0.05
2	1862	3	28.574	1.6916	0.05
2	1861	3	28.744	1.627	0.05
2	1860	3	28.932	1.5901	0.05
2	1859	3	29.159	1.5677	0.05
2	1858	3	29.392	1.5244	0.05
2	1857	3	29.58	1.49	0.05
2	1856	3	29.701	1.4853	0.05
2	1855	3	29.942	1.4458	0.05
2	1854	3	30.155	1.4028	0.05
2	1853	3	30.264	1.3948	0.05
2	1851	3	30.468	1.3555	0.05
2	1850	3	30.569	1.3411	0.05
2	1849	3	30.775	1.3016	0.05
2	1848	3	31.069	1.2596	0.05
2	1847	3	31.231	1.2415	0.05
2	1846	3	31.419	1.1995	0.05
2	1843	3	32.006	1.0729	0.05
2	1842	3	32.185	1.0523	0.05
2	1841	3	32.322	1.0277	0.05
2	1840	3	32.537	0.997	0.05
2	1839	3	32.716	0.9714	0.05
2	1838	3	32.873	0.9591	0.05
2	1797	3	43.076	0.9035	0.05
2	1790	3	43.46	0.9922	0.05
2	1789	3	43.632	1.0274	0.05
2	1788	3	43.84	1.0482	0.05
2	1787	3	44.072	1.0909	0.05
2	1785	3	44.396	1.1657	0.05
2	1784	3	44.578	1.1923	0.05
2	1783	3	44.823	1.2083	0.05
2	1782	3	45.068	1.2611	0.05
2	1781	3	45.153	1.2756	0.05
2	1780	3	45.374	1.3155	0.05
2	1779	3	45.555	1.3761	0.05
2	1778	3	45.805	1.3988	0.05
2	1777	3	45.938	1.4301	0.05
2	1776	3	46.124	1.4519	0.05
2	1775	3	46.372	1.4886	0.05
2	1774	3	46.557	1.537	0.05
2	1773	3	46.692	1.5848	0.05
2	1772	3	47.005	1.6427	0.05
2	1770	3	47.371	1.6878	0.05
2	1769	3	47.553	1.7067	0.05
2	1768	3	47.765	1.7631	0.05
2	1767	3	47.961	1.7864	0.05
2	1766	3	48.136	1.8114	0.05
2	1765	3	48.325	1.8419	0.05
2	1764	3	48.5	1.8776	0.05
2	1763	3	48.693	1.9099	0.05
2	1762	3	48.91	1.9398	0.05
2	1761	3	49.181	1.9868	0.05
2	1760	3	49.358	2.018	0.05
2	1759	3	49.57	2.0495	0.05
2	1758	3	49.804	2.0758	0.05
2	1757	3	50.03	2.1306	0.05
2	1756	3	50.232	2.1631	0.05
2	1755	3	50.438	2.1818	0.05
2	1754	3	50.718	2.2301	0.05
2	1753	3	50.948	2.2772	0.05
2	1752	3	51.182	2.3	0.05
2	1751	3	51.447	2.3402	0.05
2	1750	3	51.575	2.3573	0.05
2	1749	3	51.805	2.3997	0.05
2	1748	3	51.957	2.4309	0.05
2	1747	3	52.195	2.4649	0.05
2	1746	3	52.391	2.5285	0.05
2	1745	3	52.591	2.5191	0.05
2	1744	3	52.84	2.5855	0.05
2	1743	3	53.047	2.5985	0.05
2	1742	3	53.252	2.6539	0.05
2	1741	3	53.475	2.6644	0.05
2	1740	3	53.652	2.6992	0.05
2	1738	3	54.046	2.7863	0.05
2	1735	3	54.68	2.8864	0.05
2	1734	3	54.904	2.9244	0.05
2	1733	3	55.139	2.9746	0.05
2	1732	3	55.383	2.9853	0.05
2	1731	3	55.561	3.0274	0.05
2	1730	3	55.773	3.0516	0.05
2	1728	3	56.217	3.1468	0.05
2	1727	3	56.433	3.1731	0.05
2	1726	3	56.667	3.2035	0.05
2	1725	3	56.852	3.2314	0.05
2	1724	3	57.05	3.2582	0.05
2	1723	3	57.253	3.2872	0.05
2	1722	3	57.447	3.3285	0.05
2	1721	3	57.643	3.3399	0.05
2	1720	3	57.853	3.3956	0.05
2	1719	3	58.05	3.4116	0.05
2	1718	3	58.24	3.4645	0.05
2	1717	3	58.45	3.4854	0.05
2	1716	3	58.658	3.5302	0.05
2	1715	3	58.851	3.5684	0.05
2	1714	3	59.182	3.6142	0.05
2	1713	3	59.418	3.6509	0.05
2	1712	3	59.525	3.6662	0.05
2	1711	3	59.678	3.6865	0.05
2	1710	3	59.897	3.7163	0.05
2	1709	3	60.113	3.7577	0.05
2	1708	3	60.31	3.7723	0.05
2	1707	3	60.508	3.8051	0.05
2	1706	3	60.789	3.8725	0.05
2	1705	3	60.928	3.8712	0.05
2	1703	3	61.33	3.9618	0.05
2	1702	3	61.542	3.9846	0.05
2	1701	3	61.755	4.012	0.05
2	1659	3	70.594	5.4703	0.05
2	1658	3	70.795	5.4743	0.05
2	1657	3	71.011	5.507	0.05
2	1656	3	71.248	5.5662	0.05
2	1655	3	71.441	5.5623	0.05
2	1654	3	71.596	5.6209	0.05
2	1643	3	73.986	5.9799	0.05
2	1642	3	74.172	6.0142	0.05
2	1641	3	74.407	6.073	0.05
2	1640	3	74.602	6.0957	0.05
2	1639	3	74.817	6.1053	0.05
2	1631	3	76.511	6.4139	0.05
2	1623	3	77.967	6.6336	0.07
2	1622	3	78.131	6.6675	0.07
2	1621	3	78.355	6.7114	0.07
2	1609	3	80.82	7.0829	0.07
2	1608	3	81.024	7.0875	0.07
2	1605	3	81.576	7.2089	0.07
2	1604	3	81.814	7.2322	0.07
2	1603	3	81.921	7.2664	0.07
2	1594	3	83.423	7.5462	0.07
2	1592	3	83.798	7.6087	0.07
2	1588	3	84.633	7.7217	0.07
2	1587	3	84.833	7.7387	0.07
2	1583	3	85.725	7.8953	0.07
2	1582	3	85.904	7.916	0.07
2	1581	3	86.116	7.9725	0.07
2	1580	3	86.32	7.9612	0.07
2	1579	3	86.546	7.9777	0.07
2	1578	3	86.744	8.059	0.07
2	1577	3	86.952	8.0998	0.07
2	1576	3	87.166	8.1717	0.07
2	1575	3	87.364	8.1684	0.07
2	1574	3	87.579	8.1771	0.07
2	1573	3	87.802	8.2021	0.07
2	1572	3	87.988	8.2452	0.07
2	1571	3	88.201	8.2807	0.07
2	1569	3	88.583	8.3414	0.07
2	1568	3	88.788	8.4027	0.07
2	1563	3	89.776	8.5221	0.07
2	1562	3	89.964	8.5534	0.07
2	1561	3	90.185	8.56	0.07
2	1560	3	90.378	8.6103	0.07
2	1556	3	91.165	8.7505	0.07
2	1555	3	91.354	8.776	0.07
2	1547	3	92.953	9.0485	0.07
2	1541	3	94.169	9.2331	0.07
2	1540	3	94.383	9.2778	0.07
2	1539	3	94.583	9.3081	0.07
2	1538	3	94.799	9.3139	0.07
2	1521	3	98.427	9.9155	0.07
2	1520	3	98.718	9.9761	0.07
2	1519	3	98.848	10.0341	0.07
2	1518	3	99.039	10.0538	0.07
2	1517	3	99.228	10.1095	0.07
2	1516	3	99.428	10.1277	0.07
2	1515	3	99.609	10.1548	0.07
2	1514	3	99.782	10.1988	0.07
2	1513	3	99.96	10.2103	0.07
2	1509	3	100.715	10.3301	0.07
2	1508	3	100.926	10.3864	0.07
2	1507	3	101.124	10.4194	0.07
2	1506	3	101.317	10.4607	0.07
2	1505	3	101.525	10.4681	0.07
2	1504	3	101.726	10.4714	0.07
2	1503	3	101.922	10.5313	0.07
2	1502	3	102.13	10.5599	0.07
2	1501	3	102.282	10.5913	0.07
2	1500	3	102.524	10.6074	0.07
2	1498	3	102.924	10.6922	0.07
2	1495	3	103.542	10.7771	0.07
2	1494	3	103.75	10.8027	0.07
2	1492	3	104.166	10.8781	0.07
2	1483	3	106.44	11.2208	0.07
2	1482	3	106.676	11.2662	0.07
2	962	5	213.227	29.1226	0.1
2	961	5	213.378	29.1539	0.1
2	958	5	213.969	29.2327	0.1
2	957	5	214.194	29.2625	0.1
2	956	5	214.421	29.27	0.1
2	955	5	214.614	29.3037	0.1
2	954	5	214.814	29.3305	0.1
2	953	5	214.984	29.3566	0.1
2	952	5	215.217	29.3925	0.1
2	951	5	215.415	29.431	0.1
2	945	5	216.624	29.6371	0.1
2	944	5	216.842	29.6546	0.1
2	943	5	217.027	29.679	0.1
2	942	5	217.234	29.7108	0.1
2	941	5	217.449	29.756	0.1
2	940	5	217.634	29.7701	0.1
2	939	5	217.84	29.8242	0.1
2	938	5	218.03	29.8534	0.1
2	937	5	218.227	29.8717	0.1
2	934	5	218.869	29.9704	0.1
2	931	5	219.487	30.0776	0.1
2	930	5	219.683	30.1158	0.1
2	928	5	220.105	30.1888	0.1
2	924	5	220.905	30.3199	0.1
2	923	5	221.112	30.3518	0.1
2	922	5	221.311	30.3784	0.1
2	921	5	221.52	30.4105	0.1
2	920	5	221.721	30.4374	0.1
2	919	5	221.918	30.4677	0.1
2	913	5	223.125	30.6857	0.1
2	912	5	223.332	30.7175	0.1
2	911	5	223.54	30.7495	0.1
2	910	5	223.74	30.7722	0.1
2	905	5	224.752	30.944	0.1
2	904	5	224.957	30.9756	0.1
2	903	5	225.155	31.01	0.1
2	902	5	225.364	31.0422	0.1
2	901	5	225.559	31.0722	0.1
2	900	5	225.763	31.0875	0.1
2	899	5	225.966	31.1187	0.1
2	896	5	226.575	31.2003	0.1
2	895	5	226.777	31.2374	0.1
2	869	5	232.089	32.0979	0.1
2	868	5	232.281	32.1014	0.1
2	867	5	232.47	32.1332	0.1
2	865	5	232.905	32.1953	0.1
2	863	5	233.328	32.2606	0.1
2	862	5	233.541	32.291	0.1
2	860	5	233.953	32.3594	0.1
2	859	5	234.14	32.3861	0.1
2	858	5	234.37	32.4094	0.1
2	856	5	234.782	32.4778	0.1
3	1983	3	4.015	7.8489	0.07
3	1981	3	4.396	7.8086	0.07
3	1980	3	4.661	7.7607	0.07
3	1974	3	5.89	7.571	0.07
3	1970	3	6.693	7.4402	0.07
3	1969	3	6.911	7.4191	0.07
3	1968	3	7.099	7.3822	0.07
3	1967	3	7.317	7.3571	0.07
3	1965	3	7.665	7.2933	0.07
3	1964	3	7.849	7.265	0.07
3	1957	3	9.258	7.0516	0.07
3	1956	3	9.491	7.0243	0.07
3	1927	3	15.39	6.0577	0.07
3	1926	3	15.615	6.0175	0.07
3	1925	3	15.814	6.0052	0.07
3	1924	3	16.018	5.974	0.07
3	1922	3	16.439	5.9219	0.07
3	1894	3	22.157	4.9741	0.05
3	1893	3	22.316	4.9494	0.05
3	1891	3	22.754	4.8787	0.05
3	1890	3	22.947	4.8592	0.05
3	1889	3	23.154	4.8297	0.05
3	1887	3	23.551	4.7568	0.05
3	1886	3	23.776	4.7207	0.05
3	1884	3	24.1	4.6784	0.05
3	1883	3	24.28	4.6487	0.05
3	1880	3	24.883	4.5444	0.05
3	1879	3	25.119	4.4925	0.05
3	1878	3	25.341	4.483	0.05
3	1877	3	25.533	4.4555	0.05
3	1875	3	25.963	4.4042	0.05
3	1874	3	26.144	4.3683	0.05
3	1873	3	26.339	4.3203	0.05
3	1872	3	26.562	4.2713	0.05
3	1871	3	26.743	4.2545	0.05
3	1870	3	26.924	4.2165	0.05
3	1869	3	27.145	4.1638	0.05
3	1868	3	27.347	4.143	0.05
3	1867	3	27.555	4.1002	0.05
3	1866	3	27.791	4.0735	0.05
3	1865	3	27.996	4.0372	0.05
3	1864	3	28.246	4.0075	0.05
3	1863	3	28.518	3.9329	0.05
3	1862	3	28.714	3.918	0.05
3	1861	3	28.885	3.8593	0.05
3	1860	3	29.077	3.8319	0.05
3	1859	3	29.308	3.7938	0.05
3	1858	3	29.545	3.763	0.05
3	1857	3	29.735	3.7349	0.05
3	1854	3	30.322	3.6067	0.05
3	1852	3	30.628	3.5965	0.05
3	1850	3	30.986	3.5015	0.05
3	1849	3	31.199	3.5005	0.05
3	1848	3	31.511	3.459	0.05
3	1847	3	31.682	3.4396	0.05
3	1846	3	31.882	3.4241	0.05
3	1844	3	32.29	3.3084	0.05
3	1843	3	32.489	3.281	0.05
3	1842	3	32.677	3.2592	0.05
3	1841	3	32.824	3.2281	0.05
3	1840	3	33.058	3.2047	0.05
3	1839	3	33.256	3.1775	0.05
3	1838	3	33.436	3.1527	0.05
3	1836	3	33.903	3.0749	0.05
3	1835	3	34.082	3.0393	0.05
3	1834	3	34.306	3.0002	0.05
3	1833	3	34.478	2.9545	0.05
3	1832	3	34.688	2.9316	0.05
3	1831	3	34.924	2.916	0.05
3	1830	3	35.083	2.8681	0.05
3	1829	3	35.31	2.8387	0.05
3	1828	3	35.491	2.7997	0.05
3	1827	3	35.662	2.7602	0.05
3	1826	3	35.923	2.7269	0.05
3	1825	3	36.122	2.7197	0.05
3	1824	3	36.304	2.6816	0.05
3	1823	3	36.525	2.6298	0.05
3	1822	3	36.686	2.5998	0.05
3	1821	3	36.912	2.5514	0.05
3	1820	3	37.058	2.5477	0.05
3	1819	3	37.213	2.5306	0.05
3	1818	3	37.404	2.5128	0.05
3	1817	3	37.53	2.4878	0.05
3	1816	3	37.783	2.4234	0.05
3	1815	3	38.025	2.409	0.05
3	1814	3	38.178	2.367	0.05
3	1813	3	38.402	2.3229	0.05
3	1812	3	38.586	2.3138	0.05
3	1811	3	38.822	2.2559	0.05
3	1810	3	38.976	2.246	0.05
3	1809	3	39.213	2.1718	0.05
3	1808	3	39.387	2.1389	0.05
3	1807	3	39.64	2.1128	0.05
3	1806	3	39.785	2.1012	0.05
3	1805	3	39.962	2.0708	0.05
3	1804	3	40.178	2.049	0.05
3	1803	3	40.388	2.015	0.05
3	1802	3	40.56	1.9824	0.05
3	1801	3	40.742	1.9312	0.05
3	1800	3	40.923	1.9205	0.05
3	1799	3	41.144	1.8798	0.05
3	1798	3	41.303	1.838	0.05
3	1797	3	41.499	1.8079	0.05
3	1795	3	41.956	1.7614	0.05
3	1794	3	42.234	1.6844	0.05
3	1793	3	42.469	1.6301	0.05
3	1792	3	42.845	1.5823	0.05
3	1791	3	42.973	1.5646	0.05
3	1790	3	43.251	1.5098	0.05
3	1789	3	43.467	1.4705	0.05
3	1788	3	43.701	1.4264	0.05
3	1787	3	43.958	1.3768	0.05
3	1785	3	44.313	1.3262	0.05
3	1784	3	44.511	1.2857	0.05
3	1783	3	44.769	1.2299	0.05
3	1782	3	45.028	1.1941	0.05
3	1781	3	45.118	1.1802	0.05
3	1780	3	45.349	1.1427	0.05
3	1779	3	45.537	1.1299	0.05
3	1778	3	45.792	1.0665	0.05
3	1777	3	45.928	1.0475	0.05
3	1776	3	46.117	1.0003	0.05
3	1775	3	46.368	0.9617	0.05
3	1774	3	46.551	0.9295	0.05
3	1728	3	56.7	0.9368	0.05
3	1727	3	56.926	0.9676	0.05
3	1726	3	57.152	1.0023	0.05
3	1725	3	57.312	1.027	0.05
3	1724	3	57.486	1.0517	0.05
3	1723	3	57.667	1.0796	0.05
3	1722	3	57.841	1.1225	0.05
3	1721	3	58.017	1.1354	0.05
3	1720	3	58.208	1.1729	0.05
3	1719	3	58.388	1.2026	0.05
3	1718	3	58.564	1.2498	0.05
3	1717	3	58.761	1.2741	0.05
3	1716	3	58.958	1.3064	0.05
3	1715	3	59.142	1.3468	0.05
3	1709	3	60.383	1.5538	0.05
3	1708	3	60.58	1.6043	0.05
3	1707	3	60.777	1.6084	0.05
3	1706	3	61.051	1.6647	0.05
3	1704	3	61.383	1.7117	0.05
3	1703	3	61.578	1.7647	0.05
3	1702	3	61.785	1.7811	0.05
3	1701	3	61.991	1.8131	0.05
3	1700	3	62.179	1.8571	0.05
3	1697	3	62.764	1.9407	0.05
3	1696	3	62.831	1.9648	0.05
3	1693	3	63.76	2.1115	0.05
3	1692	3	64.102	2.1773	0.05
3	1691	3	64.3	2.2135	0.05
3	1690	3	64.565	2.25	0.05
3	1689	3	64.858	2.3051	0.05
3	1688	3	65.106	2.3328	0.05
3	1681	3	66.659	2.5757	0.05
3	1680	3	66.775	2.587	0.05
3	1679	3	66.885	2.6054	0.05
3	1678	3	67.101	2.6784	0.05
3	1676	3	67.734	2.7677	0.05
3	1675	3	67.929	2.8189	0.05
3	1674	3	68.097	2.8297	0.05
3	1673	3	68.195	2.8503	0.05
3	1672	3	68.328	2.8707	0.05
3	1671	3	68.516	2.9054	0.05
3	1670	3	68.681	2.9553	0.05
3	1667	3	69.186	3.0209	0.05
3	1666	3	69.379	3.0577	0.05
3	1665	3	69.614	3.0689	0.05
3	1664	3	69.753	3.1322	0.05
3	1663	3	70	3.1504	0.05
3	1662	3	70.136	3.1856	0.05
3	1661	3	70.317	3.226	0.05
3	1660	3	70.575	3.2404	0.05
3	1659	3	70.762	3.3014	0.05
3	1658	3	70.96	3.3297	0.05
3	1657	3	71.183	3.3589	0.05
3	1656	3	71.424	3.3973	0.05
3	1655	3	71.625	3.4181	0.05
3	1654	3	71.788	3.4559	0.05
3	1653	3	72.1	3.4899	0.05
3	1652	3	72.332	3.5375	0.05
3	1651	3	72.57	3.5715	0.05
3	1650	3	72.823	3.6143	0.05
3	1649	3	73.08	3.647	0.05
3	1648	3	73.25	3.6753	0.05
3	1646	3	73.619	3.7425	0.05
3	1645	3	73.797	3.7587	0.05
3	1644	3	73.974	3.7998	0.05
3	1643	3	74.186	3.8327	0.05
3	1642	3	74.374	3.8675	0.05
3	1641	3	74.611	3.9092	0.05
3	1640	3	74.808	3.9492	0.05
3	1639	3	75.026	3.9646	0.05
3	1638	3	75.28	3.9956	0.05
3	1637	3	75.489	4.036	0.05
3	1636	3	75.742	4.0655	0.05
3	1635	3	75.935	4.1037	0.05
3	1633	3	76.32	4.1903	0.05
3	1632	3	76.547	4.2161	0.05
3	1631	3	76.716	4.264	0.05
3	1629	3	77.042	4.3185	0.05
3	1628	3	77.188	4.3367	0.05
3	1627	3	77.373	4.3684	0.05
3	1626	3	77.517	4.4008	0.05
3	1625	3	77.699	4.4268	0.05
3	1624	3	77.881	4.4462	0.05
3	1623	3	78.092	4.4988	0.05
3	1622	3	78.255	4.5339	0.05
3	1621	3	78.477	4.5591	0.05
3	1613	3	80.186	4.8345	0.05
3	1612	3	80.328	4.8601	0.05
3	1611	3	80.561	4.8933	0.05
3	1610	3	80.697	4.9009	0.05
3	1609	3	80.924	4.9149	0.05
3	1607	3	81.297	4.9557	0.05
3	1604	3	81.882	5.0867	0.05
3	1602	3	82.166	5.1378	0.05
3	1597	3	82.873	5.2414	0.05
3	1596	3	83.059	5.279	0.05
3	1595	3	83.142	5.3159	0.05
3	1594	3	83.418	5.3554	0.05
3	1593	3	83.628	5.3867	0.05
3	1592	3	83.795	5.4184	0.05
3	1591	3	83.966	5.4073	0.05
3	1590	3	84.211	5.4449	0.05
3	1589	3	84.416	5.5151	0.05
3	1588	3	84.63	5.5575	0.05
3	1587	3	84.83	5.5474	0.05
3	1586	3	85.038	5.6105	0.05
3	1585	3	85.25	5.6153	0.05
3	1584	3	85.486	5.6824	0.05
3	1583	3	85.721	5.7213	0.05
3	1582	3	85.9	5.7442	0.05
3	1580	3	86.319	5.7922	0.05
3	1579	3	86.545	5.8245	0.05
3	1578	3	86.744	5.8819	0.05
3	1577	3	86.952	5.8602	0.05
3	1575	3	87.366	6.005	0.05
3	1574	3	87.582	6.0016	0.05
3	1573	3	87.806	6.0376	0.05
3	1572	3	87.993	6.0748	0.05
3	1571	3	88.204	6.1076	0.05
3	1570	3	88.413	6.1269	0.05
3	1567	3	88.981	6.2278	0.05
3	1566	3	89.163	6.2552	0.05
3	1565	3	89.362	6.2757	0.05
3	1564	3	89.566	6.3088	0.05
3	1563	3	89.773	6.3555	0.05
3	1562	3	89.961	6.3678	0.05
3	1561	3	90.181	6.4296	0.05
3	1560	3	90.374	6.4308	0.05
3	1559	3	90.582	6.4776	0.05
3	1558	3	90.738	6.4999	0.05
3	1557	3	90.952	6.5384	0.05
3	1556	3	91.159	6.5719	0.05
3	1555	3	91.349	6.5991	0.05
3	1553	3	91.739	6.6746	0.05
3	1552	3	91.937	6.7252	0.05
3	1551	3	92.155	6.7445	0.05
3	1550	3	92.351	6.7673	0.05
3	1549	3	92.551	6.784	0.05
3	1548	3	92.769	6.8415	0.05
3	1547	3	92.952	6.8637	0.05
3	1546	3	93.178	6.9065	0.05
3	1545	3	93.359	6.9192	0.05
3	1544	3	93.579	6.9651	0.05
3	1543	3	93.764	6.9744	0.05
3	1542	3	93.985	7.0376	0.05
3	1541	3	94.171	7.076	0.05
3	1540	3	94.382	7.1075	0.05
3	1539	3	94.581	7.1293	0.05
3	1538	3	94.796	7.1469	0.05
3	1537	3	95.003	7.1567	0.05
3	1535	3	95.431	7.2481	0.05
3	1533	3	95.848	7.3627	0.05
3	1532	3	96.066	7.3662	0.05
3	1531	3	96.31	7.3984	0.05
3	1530	3	96.493	7.4153	0.05
3	1528	3	96.947	7.4933	0.05
3	1526	3	97.352	7.5446	0.05
3	1525	3	97.568	7.5979	0.05
3	1519	3	98.858	7.7808	0.05
3	1518	3	99.048	7.8054	0.05
3	1517	3	99.235	7.8387	0.05
3	1516	3	99.433	7.8735	0.05
3	1515	3	99.612	7.8978	0.05
3	1514	3	99.782	7.9511	0.05
3	1513	3	99.957	7.9616	0.05
3	1512	3	100.136	8.0056	0.05
3	1509	3	100.709	8.0637	0.05
3	1507	3	101.118	8.167	0.05
3	1506	3	101.312	8.1736	0.05
3	1505	3	101.52	8.2007	0.05
3	1504	3	101.721	8.207	0.05
3	1503	3	101.917	8.2587	0.05
3	1502	3	102.126	8.2925	0.05
3	1501	3	102.279	8.3275	0.05
3	1500	3	102.523	8.34	0.05
3	1499	3	102.721	8.4039	0.05
3	1498	3	102.921	8.4298	0.05
3	1497	3	103.141	8.4981	0.05
3	1496	3	103.346	8.5235	0.05
3	1495	3	103.538	8.5311	0.05
3	1493	3	103.958	8.5727	0.05
3	1492	3	104.161	8.6149	0.05
3	1491	3	104.363	8.6516	0.05
3	1490	3	104.585	8.7136	0.05
3	1489	3	104.802	8.713	0.05
3	1485	3	106.045	8.9313	0.05
3	1483	3	106.436	8.9766	0.05
3	1482	3	106.672	9.0064	0.05
3	1481	3	106.868	9.0541	0.05
3	1479	3	107.268	9.1192	0.05
3	1478	3	107.464	9.1076	0.05
3	1477	3	107.686	9.1631	0.05
3	1476	3	107.914	9.1653	0.05
3	1475	3	108.135	9.2299	0.05
3	1474	3	108.347	9.2641	0.05
3	1473	3	108.562	9.3133	0.05
3	1472	3	108.772	9.3512	0.05
3	1471	3	108.966	9.3697	0.05
3	1470	3	109.129	9.3916	0.05
3	1469	3	109.319	9.4161	0.05
3	1467	3	109.69	9.4914	0.05
3	1466	3	109.878	9.5156	0.05
3	1460	3	111.085	9.7012	0.05
3	1459	3	111.291	9.757	0.05
3	1458	3	111.487	9.7731	0.05
3	1436	5	116.16	10.7722	0.07
3	1435	5	116.367	10.8141	0.07
3	1434	5	116.571	10.8379	0.07
3	1433	5	116.773	10.8992	0.07
3	1432	5	116.973	10.9048	0.07
3	1431	5	117.171	10.9151	0.07
3	1423	5	119.446	11.2702	0.07
3	1422	5	119.651	11.3118	0.07
3	1421	5	119.847	11.3445	0.07
3	1411	5	121.873	11.7292	0.07
3	1410	5	122.068	11.7542	0.07
3	1408	5	122.456	11.8113	0.07
3	1405	5	123.07	11.9209	0.07
3	1401	5	123.865	12.0608	0.07
3	1395	5	125.116	12.2659	0.07
3	1394	5	125.356	12.3129	0.07
3	1378	5	128.645	12.8567	0.07
3	1377	5	128.823	12.8841	0.07
3	1376	5	129.03	12.9134	0.07
3	1375	5	129.211	12.9362	0.07
3	1353	5	133.687	13.7004	0.07
3	1352	5	133.9	13.7357	0.07
3	1351	5	134.118	13.7919	0.07
3	1350	5	134.292	13.7935	0.07
3	1349	5	134.489	13.8313	0.07
3	1348	5	134.697	13.8709	0.07
3	1344	5	135.518	14.0022	0.07
3	1343	5	135.726	14.0342	0.07
3	1342	5	135.934	14.0662	0.07
3	1341	5	136.148	14.1118	0.07
3	1340	5	136.329	14.1396	0.07
3	1339	5	136.519	14.1713	0.07
3	1338	5	136.717	14.2094	0.07
4	1910	3	18.386	10.1015	0.05
4	1909	3	18.603	10.056	0.05
4	1908	3	18.78	10.024	0.05
4	1907	3	19.004	9.9785	0.05
4	1906	3	19.185	9.9524	0.05
4	1905	3	19.383	9.8954	0.05
4	1904	3	19.589	9.8959	0.05
4	1903	3	19.783	9.8238	0.05
4	1902	3	19.936	9.8367	0.05
4	1901	3	20.16	9.8057	0.05
4	1900	3	20.364	9.7553	0.05
4	1899	3	20.56	9.6955	0.05
4	1898	3	20.795	9.6943	0.05
4	1897	3	21.001	9.6527	0.05
4	1896	3	21.201	9.6357	0.05
4	1894	3	21.56	9.5671	0.05
4	1893	3	21.717	9.5505	0.05
4	1892	3	21.953	9.5264	0.05
4	1891	3	22.169	9.4714	0.05
4	1890	3	22.368	9.4536	0.05
4	1889	3	22.575	9.4211	0.05
4	1888	3	22.788	9.4023	0.05
4	1887	3	23.052	9.3453	0.05
4	1886	3	23.201	9.3269	0.05
4	1885	3	23.37	9.2671	0.05
4	1884	3	23.669	9.2427	0.05
4	1883	3	23.872	9.2011	0.05
4	1882	3	24.071	9.1627	0.05
4	1881	3	24.278	9.1102	0.05
4	1880	3	24.453	9.108	0.05
4	1879	3	24.675	9.0513	0.05
4	1878	3	24.855	9.0641	0.05
4	1877	3	25.051	9.0274	0.05
4	1876	3	25.26	8.985	0.05
4	1875	3	25.485	8.9712	0.05
4	1874	3	25.687	8.9337	0.05
4	1873	3	25.894	8.8819	0.05
4	1872	3	26.117	8.8404	0.05
4	1871	3	26.301	8.8199	0.05
4	1870	3	26.481	8.7913	0.05
4	1869	3	26.703	8.7394	0.05
4	1868	3	26.905	8.7028	0.05
4	1867	3	27.115	8.6718	0.05
4	1866	3	27.349	8.6432	0.05
4	1865	3	27.548	8.6109	0.05
4	1864	3	27.694	8.5824	0.05
4	1863	3	27.948	8.5297	0.05
4	1862	3	28.142	8.5126	0.05
4	1861	3	28.312	8.4536	0.05
4	1860	3	28.504	8.4349	0.05
4	1859	3	28.735	8.4047	0.05
4	1858	3	28.971	8.3537	0.05
4	1857	3	29.159	8.3278	0.05
4	1856	3	29.281	8.3219	0.05
4	1855	3	29.529	8.2807	0.05
4	1854	3	29.745	8.2267	0.05
4	1853	3	29.856	8.2311	0.05
4	1852	3	30.061	8.2134	0.05
4	1850	3	30.55	8.132	0.05
4	1849	3	30.759	8.0616	0.05
4	1848	3	31.071	8.0315	0.05
4	1847	3	31.24	8.0228	0.05
4	1846	3	31.44	7.999	0.05
4	1845	3	31.613	7.9502	0.05
4	1844	3	31.838	7.894	0.05
4	1843	3	32.033	7.8931	0.05
4	1842	3	32.218	7.8754	0.05
4	1841	3	32.363	7.846	0.05
4	1840	3	32.595	7.8331	0.05
4	1839	3	32.793	7.8058	0.05
4	1838	3	32.975	7.7807	0.05
4	1837	3	33.241	7.7456	0.05
4	1836	3	33.443	7.6247	0.05
4	1835	3	33.623	7.6096	0.05
4	1834	3	33.854	7.5602	0.05
4	1833	3	34.027	7.5268	0.05
4	1832	3	34.237	7.4968	0.05
4	1831	3	34.475	7.4898	0.05
4	1830	3	34.634	7.4382	0.05
4	1829	3	34.866	7.3993	0.05
4	1828	3	35.052	7.3708	0.05
4	1827	3	35.239	7.3354	0.05
4	1826	3	35.455	7.3045	0.05
4	1825	3	35.668	7.2943	0.05
4	1824	3	35.854	7.2514	0.05
4	1823	3	36.074	7.2016	0.05
4	1822	3	36.235	7.1709	0.05
4	1821	3	36.46	7.132	0.05
4	1820	3	36.653	7.1083	0.05
4	1819	3	36.869	7.0823	0.05
4	1818	3	37.144	7.0584	0.05
4	1817	3	37.3	7.0294	0.05
4	1816	3	37.508	6.9756	0.05
4	1815	3	37.746	6.9579	0.05
4	1814	3	37.901	6.9233	0.05
4	1813	3	38.128	6.8745	0.05
4	1812	3	38.313	6.8721	0.05
4	1811	3	38.555	6.8125	0.05
4	1810	3	38.71	6.8029	0.05
4	1809	3	38.95	6.7262	0.05
4	1808	3	39.128	6.7104	0.05
4	1807	3	39.39	6.6691	0.05
4	1806	3	39.538	6.6547	0.05
4	1805	3	39.717	6.6243	0.05
4	1804	3	39.939	6.6119	0.05
4	1803	3	40.151	6.5739	0.05
4	1802	3	40.381	6.5343	0.05
4	1801	3	40.568	6.4748	0.05
4	1799	3	40.978	6.4432	0.05
4	1798	3	41.141	6.3881	0.05
4	1797	3	41.343	6.3612	0.05
4	1794	3	41.97	6.2528	0.05
4	1793	3	42.104	6.2212	0.05
4	1792	3	42.318	6.2128	0.05
4	1791	3	42.398	6.2119	0.05
4	1790	3	42.611	6.1622	0.05
4	1789	3	42.803	6.1425	0.05
4	1788	3	43.023	6.0966	0.05
4	1787	3	43.265	6.0563	0.05
4	1785	3	43.598	6.0125	0.05
4	1784	3	43.784	5.986	0.05
4	1783	3	44.03	5.9267	0.05
4	1782	3	44.275	5.9023	0.05
4	1781	3	44.359	5.8846	0.05
4	1779	3	44.755	5.8076	0.05
4	1778	3	44.999	5.7931	0.05
4	1777	3	45.129	5.7803	0.05
4	1776	3	45.309	5.746	0.05
4	1775	3	45.549	5.6924	0.05
4	1774	3	45.725	5.6817	0.05
4	1773	3	45.852	5.6751	0.05
4	1772	3	46.145	5.6294	0.05
4	1771	3	46.314	5.6043	0.05
4	1770	3	46.492	5.5615	0.05
4	1769	3	46.665	5.5243	0.05
4	1768	3	46.862	5.4971	0.05
4	1767	3	47.049	5.4714	0.05
4	1766	3	47.214	5.4507	0.05
4	1765	3	47.39	5.4072	0.05
4	1764	3	47.556	5.371	0.05
4	1763	3	47.743	5.3578	0.05
4	1762	3	47.958	5.3145	0.05
4	1761	3	48.234	5.2674	0.05
4	1760	3	48.419	5.24	0.05
4	1759	3	48.645	5.2	0.05
4	1758	3	48.901	5.1567	0.05
4	1757	3	49.154	5.1369	0.05
4	1756	3	49.38	5.0998	0.05
4	1755	3	49.608	5.0441	0.05
4	1754	3	49.908	4.9955	0.05
4	1753	3	50.147	4.9719	0.05
4	1752	3	50.387	4.9145	0.05
4	1751	3	50.654	4.8725	0.05
4	1750	3	50.781	4.8486	0.05
4	1749	3	51.011	4.8254	0.05
4	1748	3	51.163	4.7901	0.05
4	1747	3	51.4	4.7611	0.05
4	1746	3	51.597	4.6742	0.05
4	1745	3	51.797	4.689	0.05
4	1744	3	52.046	4.6688	0.05
4	1743	3	52.253	4.6036	0.05
4	1742	3	52.458	4.5868	0.05
4	1741	3	52.68	4.5262	0.05
4	1740	3	52.855	4.5099	0.05
4	1739	3	53.032	4.5073	0.05
4	1738	3	53.247	4.4645	0.05
4	1737	3	53.46	4.4244	0.05
4	1736	3	53.671	4.3837	0.05
4	1735	3	53.876	4.3592	0.05
4	1734	3	54.096	4.3124	0.05
4	1733	3	54.324	4.3019	0.05
4	1732	3	54.562	4.2323	0.05
4	1731	3	54.734	4.2231	0.05
4	1730	3	54.939	4.1813	0.05
4	1729	3	55.156	4.1089	0.05
4	1728	3	55.366	4.142	0.05
4	1727	3	55.573	4.0932	0.05
4	1726	3	55.804	4.0486	0.05
4	1725	3	55.992	4.0082	0.05
4	1724	3	56.193	3.9718	0.05
4	1723	3	56.4	3.9384	0.05
4	1722	3	56.596	3.9248	0.05
4	1721	3	56.795	3.8714	0.05
4	1720	3	57.009	3.8495	0.05
4	1719	3	57.208	3.822	0.05
4	1718	3	57.401	3.8021	0.05
4	1717	3	57.611	3.75	0.05
4	1716	3	57.821	3.7209	0.05
4	1715	3	58.014	3.7011	0.05
4	1714	3	58.345	3.6316	0.05
4	1713	3	58.579	3.6049	0.05
4	1712	3	58.684	3.5813	0.05
4	1711	3	58.836	3.5509	0.05
4	1710	3	59.053	3.5083	0.05
4	1709	3	59.267	3.4941	0.05
4	1708	3	59.462	3.4692	0.05
4	1707	3	59.657	3.4133	0.05
4	1706	3	59.939	3.3711	0.05
4	1704	3	60.277	3.2988	0.05
4	1703	3	60.479	3.3084	0.05
4	1702	3	60.691	3.2531	0.05
4	1701	3	60.906	3.1973	0.05
4	1700	3	61.095	3.2031	0.05
4	1699	3	61.41	3.1195	0.05
4	1698	3	61.536	3.1102	0.05
4	1697	3	61.724	3.066	0.05
4	1696	3	61.794	3.082	0.05
4	1695	3	62.038	3.0414	0.05
4	1694	3	62.313	3.0175	0.05
4	1693	3	62.541	2.9435	0.05
4	1692	3	62.767	2.9218	0.05
4	1691	3	62.941	2.9056	0.05
4	1690	3	63.183	2.8489	0.05
4	1689	3	63.436	2.807	0.05
4	1688	3	63.667	2.7634	0.05
4	1687	3	63.799	2.7371	0.05
4	1686	3	64.016	2.6974	0.05
4	1685	3	64.212	2.6781	0.05
4	1684	3	64.356	2.6421	0.05
4	1683	3	64.524	2.6267	0.05
4	1682	3	64.687	2.616	0.05
4	1681	3	64.953	2.5558	0.05
4	1680	3	65.07	2.4945	0.05
4	1679	3	65.189	2.5182	0.05
4	1678	3	65.428	2.4793	0.05
4	1676	3	66.05	2.3789	0.05
4	1675	3	66.241	2.3593	0.05
4	1674	3	66.402	2.316	0.05
4	1673	3	66.505	2.3167	0.05
4	1672	3	66.645	2.2871	0.05
4	1671	3	66.842	2.257	0.05
4	1670	3	67.044	2.2301	0.05
4	1669	3	67.258	2.1841	0.05
4	1668	3	67.469	2.1675	0.05
4	1667	3	67.678	2.1241	0.05
4	1666	3	67.92	2.0944	0.05
4	1665	3	68.215	2.0407	0.05
4	1664	3	68.384	2.0155	0.05
4	1663	3	68.688	1.9552	0.05
4	1662	3	68.864	1.9272	0.05
4	1660	3	69.452	1.8124	0.05
4	1659	3	69.669	1.8016	0.05
4	1658	3	69.87	1.7671	0.05
4	1657	3	70.066	1.7218	0.05
4	1656	3	70.286	1.6952	0.05
4	1655	3	70.452	1.6579	0.05
4	1654	3	70.579	1.6437	0.05
4	1653	3	70.811	1.599	0.05
4	1652	3	70.978	1.5741	0.05
4	1651	3	71.144	1.5417	0.05
4	1650	3	71.328	1.5116	0.05
4	1649	3	71.576	1.4656	0.05
4	1648	3	71.766	1.422	0.05
4	1647	3	71.946	1.4098	0.05
4	1646	3	72.182	1.3742	0.05
4	1645	3	72.38	1.3295	0.05
4	1644	3	72.574	1.295	0.05
4	1643	3	72.8	1.2608	0.05
4	1642	3	72.962	1.2387	0.05
4	1641	3	73.162	1.212	0.05
4	1640	3	73.327	1.1913	0.05
4	1639	3	73.505	1.1389	0.05
4	1638	3	73.71	1.1058	0.05
4	1637	3	73.876	1.0705	0.05
4	1636	3	74.079	1.0415	0.05
4	1635	3	74.255	1.0183	0.05
4	1634	3	74.457	0.9942	0.05
4	1633	3	74.613	0.9768	0.05
4	1593	3	84.866	0.9369	0.05
4	1592	3	85.016	0.9612	0.05
4	1591	3	85.164	0.9756	0.05
4	1590	3	85.393	0.9813	0.05
4	1589	3	85.513	1.0281	0.05
4	1584	3	85.556	1.059	0.05
4	1588	3	85.655	1.066	0.05
4	1583	3	85.677	1.0939	0.05
4	1585	3	85.687	1.06	0.05
4	1587	3	85.773	1.0617	0.05
4	1582	3	85.812	1.1078	0.05
4	1586	3	85.839	1.0921	0.05
4	1581	3	85.948	1.1401	0.05
4	1580	3	86.054	1.1336	0.05
4	1579	3	86.243	1.1591	0.05
4	1578	3	86.407	1.2201	0.05
4	1577	3	86.594	1.1934	0.05
4	1576	3	86.778	1.2804	0.05
4	1575	3	86.947	1.3291	0.05
4	1574	3	87.133	1.3282	0.05
4	1573	3	87.321	1.3536	0.05
4	1572	3	87.477	1.3976	0.05
4	1571	3	87.719	1.4394	0.05
4	1570	3	87.96	1.4579	0.05
4	1569	3	88.143	1.4884	0.05
4	1568	3	88.362	1.5544	0.05
4	1567	3	88.567	1.5605	0.05
4	1566	3	88.763	1.5755	0.05
4	1565	3	88.977	1.6133	0.05
4	1564	3	89.194	1.6515	0.05
4	1563	3	89.412	1.6986	0.05
4	1562	3	89.615	1.716	0.05
4	1561	3	89.849	1.7812	0.05
4	1560	3	90.052	1.7828	0.05
4	1559	3	90.244	1.8276	0.05
4	1558	3	90.567	1.8737	0.05
4	1557	3	90.83	1.917	0.05
4	1556	3	91.084	1.9721	0.05
4	1555	3	91.334	2.0064	0.05
4	1554	3	91.584	2.0493	0.05
4	1553	3	91.812	2.092	0.05
4	1552	3	92.042	2.1437	0.05
4	1551	3	92.294	2.1746	0.05
4	1550	3	92.522	2.2029	0.05
4	1549	3	92.758	2.2322	0.05
4	1548	3	93.007	2.2895	0.05
4	1547	3	93.093	2.3076	0.05
4	1546	3	93.234	2.332	0.05
4	1545	3	93.429	2.3454	0.05
4	1544	3	93.728	2.3997	0.05
4	1543	3	93.944	2.4205	0.05
4	1542	3	94.163	2.4864	0.05
4	1541	3	94.333	2.5049	0.05
4	1540	3	94.471	2.5435	0.05
4	1539	3	94.609	2.5646	0.05
4	1538	3	94.765	2.558	0.05
4	1537	3	94.916	2.5709	0.05
4	1535	3	95.14	2.6405	0.05
4	1534	3	95.324	2.6884	0.05
4	1533	3	95.497	2.7334	0.05
4	1532	3	95.665	2.7323	0.05
4	1531	3	95.86	2.7563	0.05
4	1530	3	96.013	2.7739	0.05
4	1529	3	96.199	2.8265	0.05
4	1528	3	96.395	2.8429	0.05
4	1527	3	96.557	2.8704	0.05
4	1526	3	96.738	2.8991	0.05
4	1525	3	96.93	2.9367	0.05
4	1524	3	97.128	2.9433	0.05
4	1523	3	97.336	3.0019	0.05
4	1522	3	97.531	3.0543	0.05
4	1521	3	97.733	3.0687	0.05
4	1520	3	98.007	3.1194	0.05
4	1519	3	98.141	3.1082	0.05
4	1518	3	98.341	3.131	0.05
4	1517	3	98.547	3.1691	0.05
4	1516	3	98.765	3.2046	0.05
4	1515	3	98.963	3.2314	0.05
4	1514	3	99.181	3.2944	0.05
4	1513	3	99.426	3.3178	0.05
4	1512	3	99.621	3.3674	0.05
4	1511	3	99.866	3.4284	0.05
4	1510	3	100.122	3.4447	0.05
4	1509	3	100.355	3.4607	0.05
4	1508	3	100.577	3.5169	0.05
4	1507	3	100.783	3.5579	0.05
4	1506	3	100.995	3.5608	0.05
4	1505	3	101.21	3.5958	0.05
4	1504	3	101.449	3.614	0.05
4	1503	3	101.649	3.6672	0.05
4	1502	3	101.874	3.6965	0.05
4	1501	3	102.076	3.7441	0.05
4	1500	3	102.367	3.845	0.05
4	1499	3	102.571	3.8336	0.05
4	1498	3	102.693	3.8424	0.05
4	1497	3	102.88	3.911	0.05
4	1496	3	103.082	3.937	0.05
4	1495	3	103.25	3.9436	0.05
4	1494	3	103.44	3.9361	0.05
4	1493	3	103.645	3.9726	0.05
4	1492	3	103.858	4.029	0.05
4	1491	3	104.071	4.0681	0.05
4	1490	3	104.203	4.1217	0.05
4	1489	3	104.346	4.117	0.05
4	1488	3	104.907	4.2664	0.05
4	1487	3	105.102	4.3062	0.05
4	1486	3	105.315	4.3401	0.05
4	1485	3	105.513	4.3399	0.05
4	1484	3	105.724	4.3985	0.05
4	1483	3	105.884	4.3861	0.05
4	1482	3	106.105	4.4283	0.05
4	1481	3	106.309	4.4797	0.05
4	1479	3	106.726	4.5479	0.05
4	1478	3	106.906	4.617	0.05
4	1477	3	107.104	4.5918	0.05
4	1476	3	107.308	4.6961	0.05
4	1475	3	107.507	4.658	0.05
4	1474	3	107.699	4.6869	0.05
4	1473	3	107.899	4.727	0.05
4	1472	3	108.1	4.7659	0.05
4	1471	3	108.315	4.785	0.05
4	1470	3	108.538	4.8169	0.05
4	1469	3	108.758	4.8772	0.05
4	1468	3	108.975	4.8837	0.05
4	1467	3	109.203	4.9336	0.05
4	1466	3	109.396	4.9857	0.05
4	1465	3	109.608	5.0146	0.05
4	1464	3	109.809	5.036	0.05
4	1463	3	110.026	5.0815	0.05
4	1462	3	110.265	5.1113	0.05
4	1461	3	110.476	5.0937	0.05
4	1460	3	110.677	5.1441	0.05
4	1459	3	110.882	5.1807	0.05
4	1458	3	111.077	5.1926	0.05
4	1456	3	111.491	5.2893	0.05
4	1455	3	111.699	5.3306	0.05
4	1454	3	112.133	5.3753	0.05
4	1453	3	112.339	5.4018	0.05
4	1452	3	112.517	5.4504	0.05
4	1451	3	112.713	5.4625	0.05
4	1450	3	112.909	5.4963	0.05
4	1449	3	113.112	5.5354	0.05
4	1448	3	113.303	5.5843	0.05
4	1447	3	113.511	5.6126	0.05
4	1446	3	113.722	5.6167	0.05
4	1445	3	113.926	5.6589	0.05
4	1444	3	114.126	5.6889	0.05
4	1443	3	114.321	5.7269	0.05
4	1442	3	114.542	5.7512	0.05
4	1441	3	114.735	5.799	0.05
4	1440	3	114.947	5.8394	0.05
4	1439	3	115.149	5.8437	0.05
4	1437	3	115.53	5.9025	0.05
4	1436	3	115.729	5.9468	0.05
4	1435	3	115.938	5.9897	0.05
4	1434	3	116.146	6.0035	0.05
4	1433	3	116.352	6.0488	0.05
4	1432	3	116.562	6.073	0.05
4	1431	3	116.751	6.0711	0.05
4	1430	3	116.949	6.1283	0.05
4	1429	3	117.125	6.1607	0.05
4	1428	3	117.337	6.1881	0.05
4	1427	3	118.133	6.3221	0.05
4	1426	3	118.31	6.3618	0.05
4	1425	3	118.514	6.3895	0.05
4	1424	3	118.719	6.4202	0.05
4	1423	3	118.923	6.4291	0.05
4	1422	3	119.123	6.4722	0.05
4	1421	3	119.312	6.4833	0.05
4	1420	3	119.511	6.5392	0.05
4	1419	3	119.731	6.5662	0.05
4	1418	3	119.935	6.6417	0.05
4	1417	3	120.135	6.6442	0.05
4	1416	3	120.313	6.6682	0.05
4	1415	3	120.525	6.6609	0.05
4	1414	3	120.758	6.7361	0.05
4	1413	3	120.993	6.7885	0.05
4	1412	3	121.248	6.8061	0.05
4	1411	3	121.497	6.859	0.05
4	1410	3	121.701	6.8751	0.05
4	1409	3	121.915	6.9303	0.05
4	1408	3	122.109	6.9566	0.05
4	1407	3	122.331	6.997	0.05
4	1406	3	122.523	7.0504	0.05
4	1405	3	122.738	7.0927	0.05
4	1403	3	123.137	7.16	0.05
4	1402	3	123.336	7.174	0.05
4	1401	3	123.51	7.196	0.05
4	1396	3	124.472	7.3597	0.05
4	1395	3	124.638	7.3935	0.05
4	1394	3	124.865	7.3982	0.05
4	1393	3	125.066	7.4402	0.05
4	1391	3	125.431	7.462	0.05
4	1390	3	125.637	7.5044	0.05
4	1389	3	125.835	7.5327	0.05
4	1388	3	126.069	7.582	0.05
4	1386	3	126.413	7.6572	0.05
4	1385	3	126.648	7.6835	0.05
4	1384	3	126.858	7.7179	0.05
4	1383	3	127.071	7.7512	0.05
4	1382	3	127.282	7.7785	0.05
4	1381	3	127.495	7.8147	0.05
4	1380	3	127.698	7.8494	0.05
4	1379	3	127.885	7.8935	0.05
4	1378	3	128.112	7.9259	0.05
4	1377	3	128.29	7.9514	0.05
4	1376	3	128.495	7.9893	0.05
4	1375	3	128.674	8.0192	0.05
4	1374	3	128.883	8.0505	0.05
4	1373	3	129.095	8.0707	0.05
4	1372	3	129.294	8.0934	0.05
4	1369	3	129.899	8.2145	0.05
4	1368	3	130.107	8.2355	0.05
4	1367	3	130.32	8.2819	0.05
4	1366	3	130.503	8.321	0.05
4	1365	3	130.706	8.3457	0.05
4	1363	3	131.11	8.4106	0.05
4	1362	3	131.33	8.4536	0.05
4	1361	3	131.52	8.4894	0.05
4	1360	3	131.76	8.5309	0.05
4	1359	3	131.933	8.56	0.05
4	1358	3	132.076	8.5761	0.05
4	1356	3	132.566	8.6764	0.05
4	1355	3	132.753	8.6901	0.05
4	1353	3	133.169	8.7785	0.05
4	1352	3	133.382	8.8099	0.05
4	1351	3	133.601	8.8713	0.05
4	1350	3	133.776	8.8934	0.05
4	1349	3	133.973	8.9366	0.05
4	1348	3	134.18	8.9757	0.05
4	1347	3	134.391	8.9755	0.05
4	1346	3	134.602	9.0053	0.05
4	1345	3	134.789	9.0461	0.05
4	1344	3	135.001	9.0959	0.05
4	1343	3	135.21	9.1315	0.05
4	1342	3	135.417	9.1539	0.05
4	1341	3	135.631	9.1902	0.05
4	1340	3	135.813	9.2177	0.05
4	1339	3	136.005	9.2523	0.05
4	1338	3	136.207	9.2913	0.05
4	1337	3	136.421	9.3219	0.05
4	1336	3	136.648	9.3644	0.05
4	1335	3	136.845	9.4012	0.05
4	1334	3	137.045	9.4428	0.05
4	1333	3	137.241	9.465	0.05
4	1332	3	137.45	9.5007	0.05
4	1331	3	137.677	9.494	0.05
4	1330	3	137.887	9.5734	0.05
4	1329	3	138.05	9.6002	0.05
4	1327	3	138.476	9.6363	0.05
4	1326	3	138.714	9.7056	0.05
4	1325	3	138.905	9.7294	0.05
4	1324	3	139.124	9.7692	0.05
4	1323	3	139.357	9.8025	0.05
4	1322	3	139.556	9.8612	0.05
4	1321	3	139.739	9.8947	0.25
4	1319	3	140.114	9.955	0.25
4	1318	3	140.329	9.9575	0.25
4	1317	3	140.583	10.0114	0.25
4	1316	3	140.821	10.0207	0.25
4	1315	3	141.004	10.0751	0.25
4	1314	3	141.197	10.1308	0.25
4	1313	3	141.437	10.1581	0.25
4	1311	3	141.814	10.2366	0.25
4	1310	3	142.029	10.2779	0.25
4	1309	3	142.223	10.3233	0.25
4	1308	3	142.424	10.3872	0.25
4	1307	3	142.616	10.3675	0.25
4	1306	3	142.832	10.424	0.25
4	1305	3	143.027	10.4963	0.25
4	1303	3	143.436	10.5394	0.25
4	1302	3	143.662	10.5768	0.25
4	1301	3	143.871	10.6101	0.25
4	1300	3	144.08	10.6314	0.25
4	1299	3	144.27	10.6619	0.25
4	1297	3	144.671	10.7038	0.25
4	1296	3	144.9	10.7981	0.25
4	1295	3	145.09	10.827	0.25
4	1294	3	145.324	10.8689	0.25
4	1290	3	146.123	10.9762	0.25
4	1289	3	146.298	11.0303	0.25
4	1288	3	146.554	11.0942	0.25
4	1286	3	146.949	11.0942	0.25
4	1285	3	147.151	11.1128	0.25
4	1284	3	147.331	11.1505	0.25
4	1283	3	147.524	11.1473	0.25
4	1282	3	147.745	11.2456	0.25
4	1281	3	147.972	11.3173	0.25
4	1280	3	148.203	11.3435	0.25
4	1278	3	148.605	11.4009	0.25
4	1277	3	148.821	11.4386	0.25
4	1276	3	149.043	11.5045	0.25
4	1275	3	149.223	11.484	0.25
4	1274	3	149.405	11.4656	0.25
4	1273	3	149.616	11.5419	0.25
4	1272	3	149.879	11.6188	0.25
4	1271	3	150.071	11.6565	0.25
4	1270	3	150.307	11.7158	0.25
4	1269	3	150.503	11.7729	0.25
4	1268	3	150.716	11.7877	0.25
4	1267	3	150.932	11.8222	0.25
4	1266	3	151.156	11.8542	0.25
4	1263	3	151.771	11.9745	0.25
4	1262	3	151.984	12.0323	0.25
4	1260	3	152.399	12.0986	0.25
4	1259	3	152.573	12.1411	0.25
4	1258	3	152.788	12.1824	0.25
4	1257	3	152.99	12.2501	0.25
4	1256	3	153.221	12.2725	0.25
4	1241	5	156.248	13.2442	0.25
4	1240	5	156.461	13.2928	0.25
4	1239	5	156.637	13.2917	0.25
4	1238	5	156.813	13.333	0.25
4	1237	5	156.983	13.3573	0.25
4	1236	5	157.175	13.3907	0.25
4	1235	5	157.412	13.4448	0.25
4	1234	5	157.617	13.466	0.25
4	1233	5	157.785	13.5202	0.25
4	1231	5	158.219	13.5983	0.25
4	1230	5	158.37	13.6562	0.25
4	1229	5	158.54	13.6805	0.25
4	1228	5	158.903	13.7283	0.25
4	1225	5	159.349	13.8061	0.25
4	1224	5	159.578	13.8711	0.25
4	1223	5	159.78	13.9322	0.25
4	1222	5	160.007	13.9565	0.25
4	1221	5	160.216	14.0025	0.25
4	1218	5	160.807	14.0507	0.25
4	1216	5	161.259	14.1495	0.25
4	1213	5	161.896	14.2848	0.25
4	1212	5	162.086	14.3039	0.25
4	1211	5	162.285	14.3505	0.25
4	1210	5	162.558	14.3854	0.25
4	1209	5	162.737	14.4392	0.25
4	1203	5	163.939	14.5686	0.25
4	1202	5	164.124	14.6011	0.25
4	1199	5	164.723	14.7209	0.25
4	1198	5	164.842	14.7379	0.25
4	1197	5	165.048	14.7734	0.25
4	1193	5	165.784	14.9005	0.25
4	1192	5	165.983	14.9329	0.25
4	1191	5	166.183	15.0018	0.25
4	1190	5	166.386	14.9784	0.25
4	1189	5	166.556	15.0389	0.25
4	1188	5	166.764	15.0525	0.25
4	1187	5	166.968	15.0575	0.25
4	1186	5	167.171	15.1026	0.25
4	1185	5	167.372	15.1192	0.25
4	1184	5	167.596	15.1593	0.25
4	1183	5	167.771	15.1924	0.25
4	1182	5	167.991	15.2238	0.25
4	1163	5	171.796	15.7795	0.25
4	1162	5	171.999	15.8125	0.25
4	1161	5	172.196	15.8205	0.25
4	1160	5	172.387	15.884	0.25
4	1159	5	172.595	15.9097	0.25
4	1158	5	172.79	15.8932	0.25
4	1157	5	172.997	15.9268	0.25
4	1156	5	173.202	15.9561	0.25
4	1152	5	174.014	16.0802	0.25
4	1151	5	174.247	16.1256	0.25
4	1150	5	174.416	16.1537	0.25
4	1144	5	175.65	16.3595	0.25
4	1141	5	176.268	16.4679	0.25
4	1140	5	176.467	16.5165	0.25
4	1139	5	176.667	16.5531	0.25
4	1138	5	176.874	16.5747	0.25
4	1137	5	177.075	16.5792	0.25
4	1123	5	179.916	17.0133	0.25
4	1122	5	180.129	17.0578	0.25
4	1121	5	180.336	17.0773	0.25
4	1120	5	180.539	17.1043	0.25
4	1119	5	180.745	17.1277	0.25
4	1118	5	180.947	17.1605	0.25
4	1117	5	181.15	17.1976	0.25
4	1116	5	181.354	17.2147	0.25
4	1115	5	181.56	17.2441	0.25
4	1113	5	181.97	17.3062	0.25
4	1064	5	191.909	18.7974	0.07
4	1063	5	192.137	18.8403	0.07
4	1062	5	192.341	18.8728	0.07
4	1061	5	192.544	18.8847	0.07
4	1060	5	192.74	18.9401	0.07
4	1059	5	192.951	18.9805	0.07
4	1058	5	193.152	19.0049	0.07
4	1057	5	193.362	19.0469	0.07
4	1056	5	193.574	19.0549	0.07
4	1055	5	193.768	19.1083	0.07
4	1054	5	193.97	19.1525	0.07
4	1053	5	194.173	19.185	0.07
4	1052	5	194.371	19.2252	0.07
4	1051	5	194.576	19.2289	0.07
4	1049	5	194.974	19.2977	0.07
4	1048	5	195.173	19.3176	0.07
4	1047	5	195.383	19.3441	0.07
4	1045	5	195.786	19.4	0.07
4	1042	5	196.357	19.4833	0.07
4	1040	5	196.823	19.5738	0.07
4	1039	5	197.012	19.5974	0.07
4	1038	5	197.208	19.6408	0.07
4	1037	5	197.39	19.665	0.07
4	1036	5	197.606	19.7412	0.07
4	1034	5	198.054	19.8189	0.07
4	1032	5	198.434	19.8826	0.07
4	1031	5	198.639	19.8922	0.07
4	1030	5	198.864	19.9363	0.07
4	1029	5	199.063	19.9408	0.07
4	1028	5	199.233	19.948	0.07
4	1027	5	199.435	19.9546	0.07
4	1026	5	199.65	20.0093	0.07
4	1025	5	199.857	20.0628	0.07
4	1024	5	200.034	20.1222	0.07
4	1020	5	200.896	20.2881	0.07
4	1019	5	201.08	20.3589	0.07
4	1018	5	201.281	20.403	0.07
4	1017	5	201.48	20.4194	0.07
4	1016	5	201.674	20.4471	0.07
4	1013	5	202.283	20.5529	0.07
4	1012	5	202.492	20.5691	0.07
4	1011	5	202.703	20.6087	0.07
4	1010	5	202.904	20.6271	0.07
4	1009	5	203.111	20.643	0.07
4	1005	5	203.925	20.7798	0.07
4	1004	5	204.14	20.8276	0.07
4	1003	5	204.345	20.8774	0.07
4	1001	5	204.759	20.9955	0.07
4	1000	5	204.96	21.0345	0.07
4	998	5	205.367	21.0858	0.07
4	995	5	205.986	21.1725	0.07
4	993	5	206.382	21.2086	0.07
4	992	5	206.599	21.2396	0.07
4	991	5	206.798	21.2971	0.07
4	990	5	207.006	21.3063	0.07
4	988	5	207.429	21.3684	0.07
4	985	5	208.018	21.485	0.07
4	983	5	208.43	21.561	0.07
4	981	5	208.833	21.5981	0.07
4	980	5	209.031	21.6349	0.07
4	979	5	209.225	21.6352	0.07
4	978	5	209.44	21.7053	0.07
[truncated: 13,750 more rows]
